# Supplementary material for: Phosphine Functionalized CpC Ligands and Their Metal Complexes
Source: MDPI journal article supplement (doi:10.3390/chemistry5020062), 2023-04-18

# **Supporting Information**

**belonging to the manuscript**

## **Phosphine Functionalized Cp<sup>C</sup> Ligands and their Metal Complexes**

**by**

**Florian Nährig, Yu Sun and Werner R. Thiel\***

Fachbereich Chemie, RPTU Kaiserslautern-Landau,  
Erwin-Schrödinger-Straße 54, D-67663 Kaiserslautern, Germany

Fax: +49 631 2054676

E-Mail: [thiel@chemie.uni-kl.de](mailto:thiel@chemie.uni-kl.de)

## Additional Spectra

$\text{Cp}^{\text{C}}\text{HBzPPH}_2$  (**2**):

Figure S1:  $^1\text{H}$  NMR spectrum of **2**.

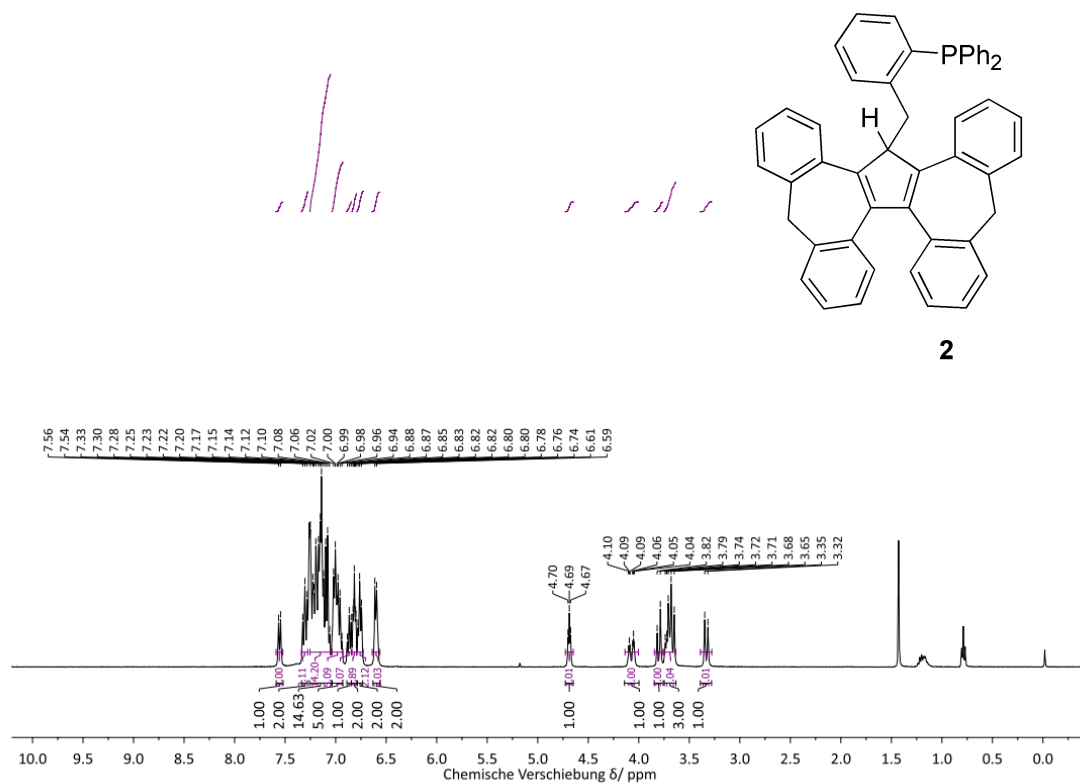

Figure S2:  $^1\text{H}$  NMR spectrum of **2** (expanded).

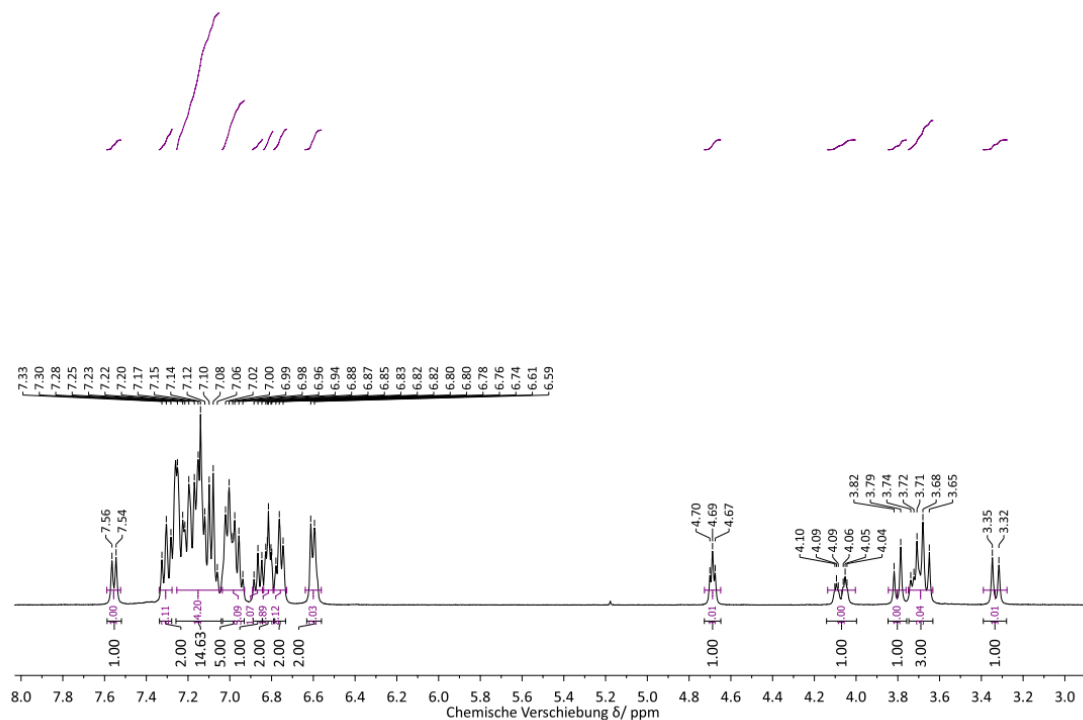

**Figure S3:**  $^{13}\text{C}\{^1\text{H}\}$  NMR spectrum of **2**.

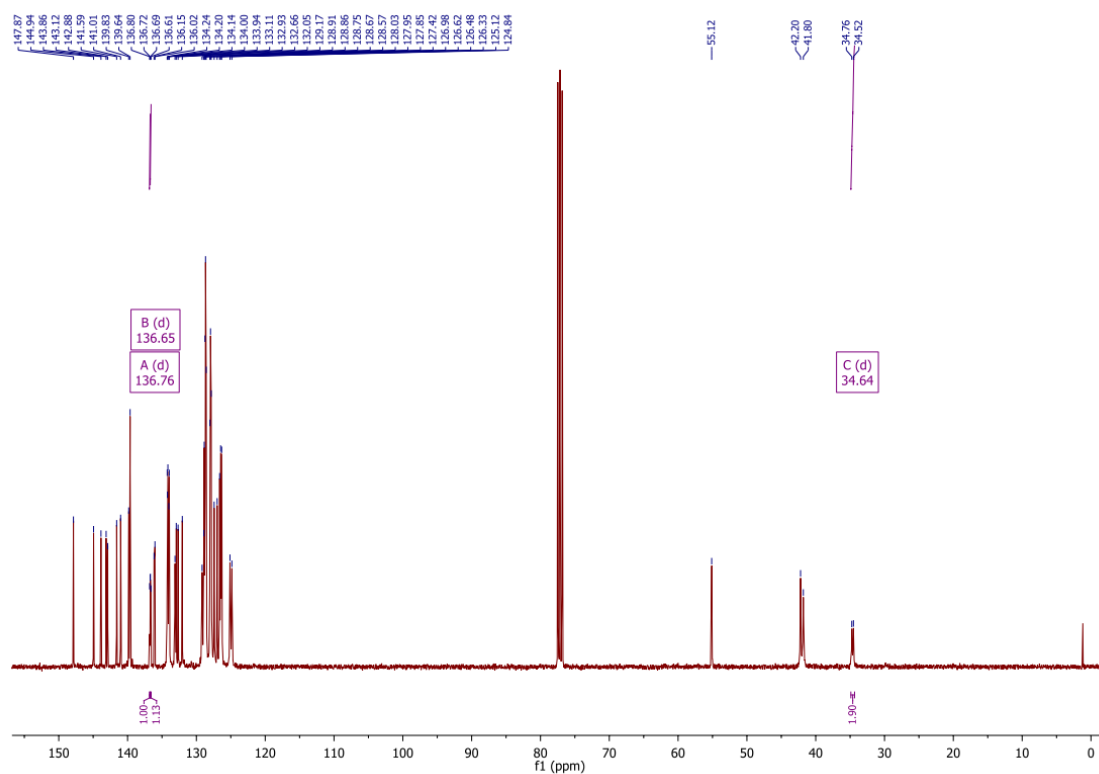

**Figure S4:**  $^{13}\text{C}\{^1\text{H}\}$  NMR spectrum of **2** (expanded).

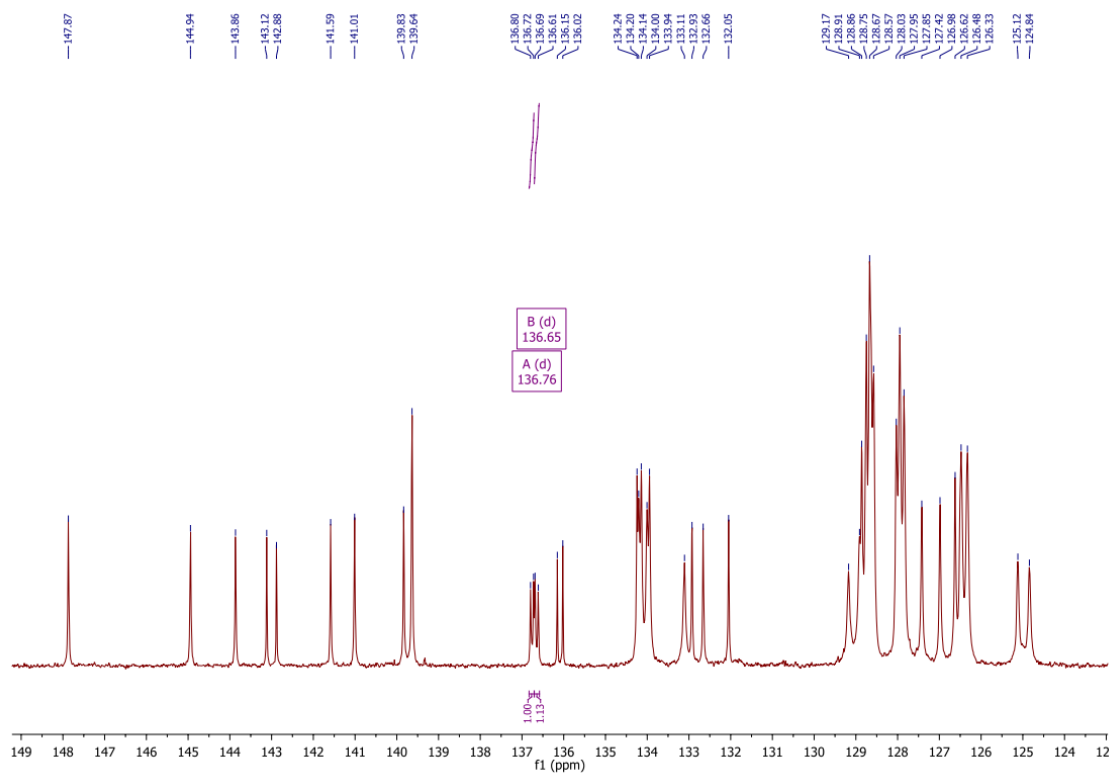

**Figure S5:**  $^{31}\text{P}\{^1\text{H}\}$  NMR spectrum of **2**.

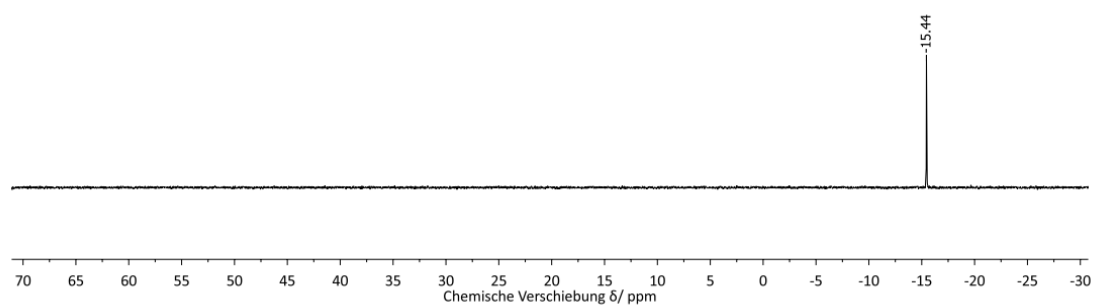

**Figure S6:** H,H-COSY NMR spectrum of **2**.

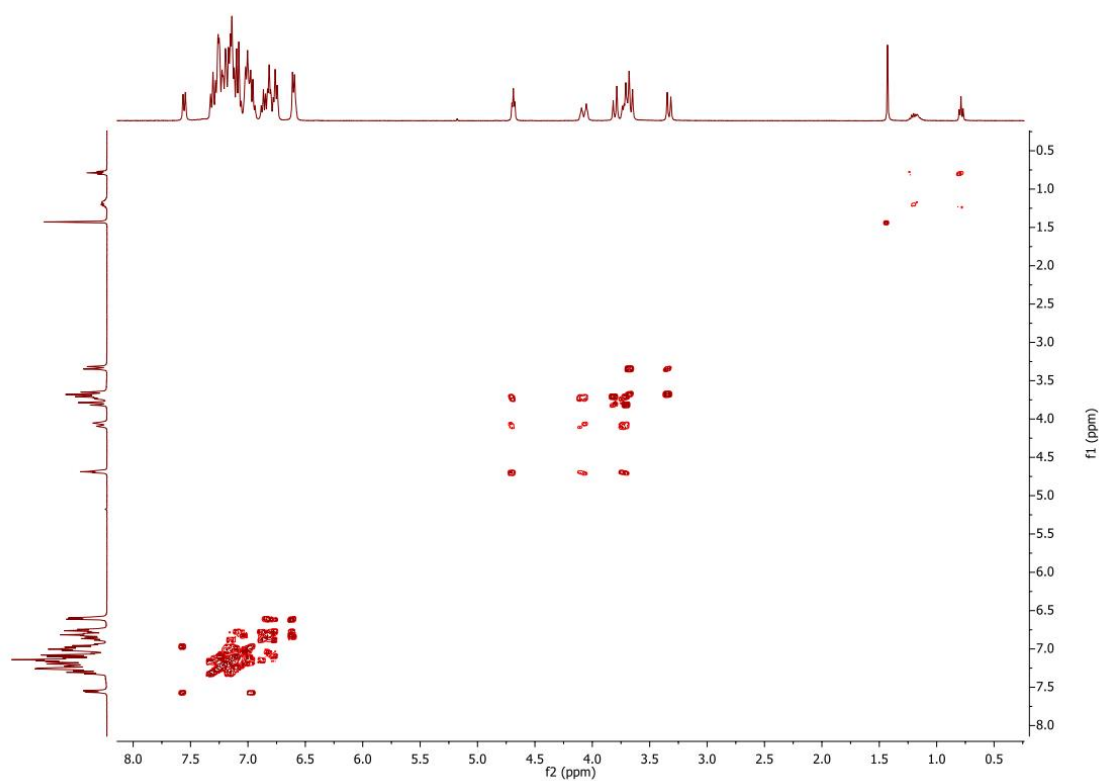

**Figure S7:** H,H-COSY NMR spectrum of **2** (expanded).

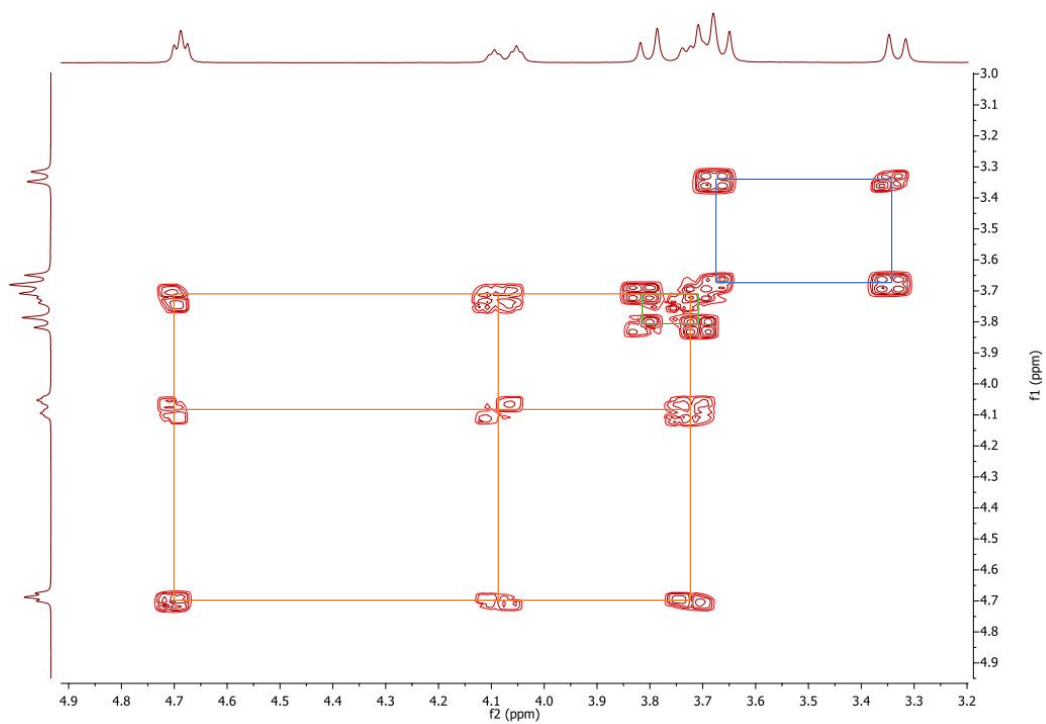

**Figure S8:** H,H-COSY NMR spectrum of **2** (expanded).

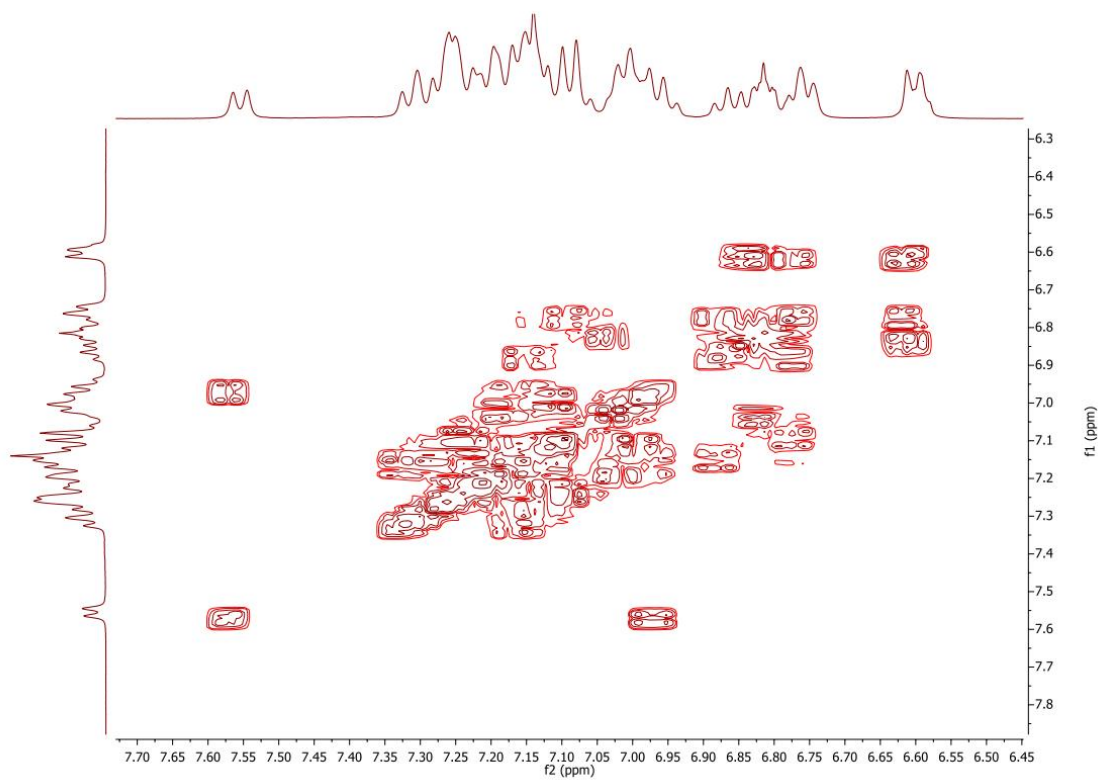

**Figure S9:** HMQC NMR spectrum of **2**.

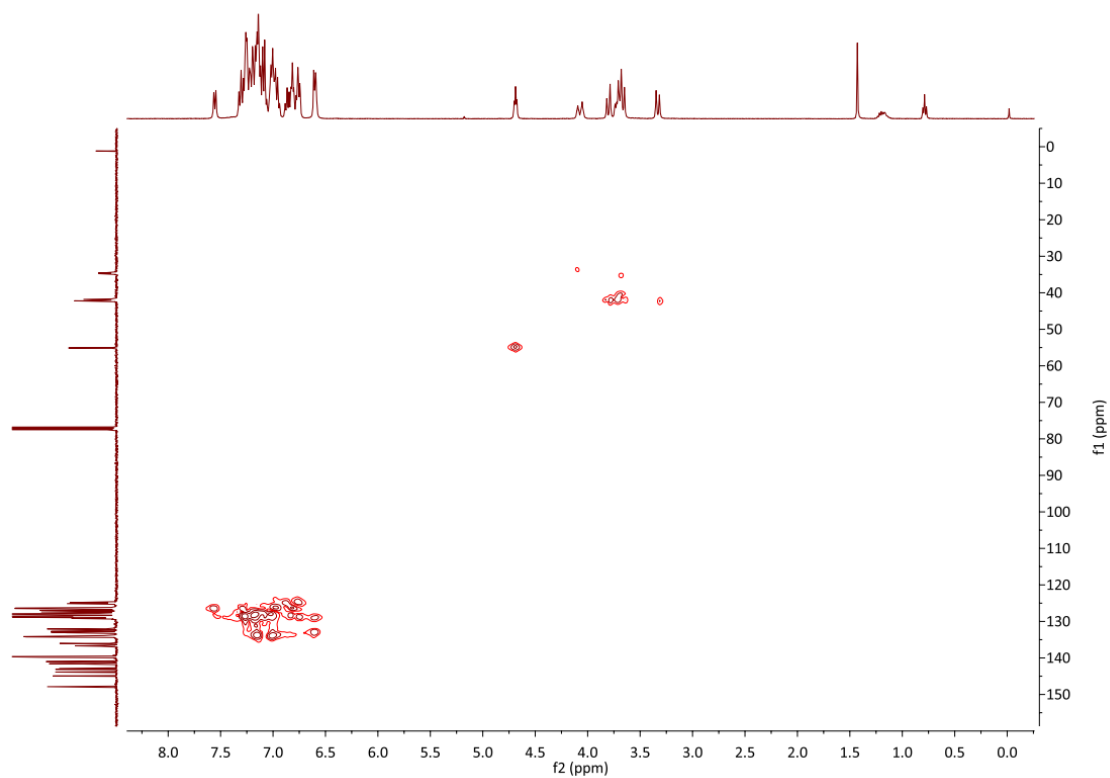

**Figure S10:** HMQC NMR spectrum of **2** (expanded).

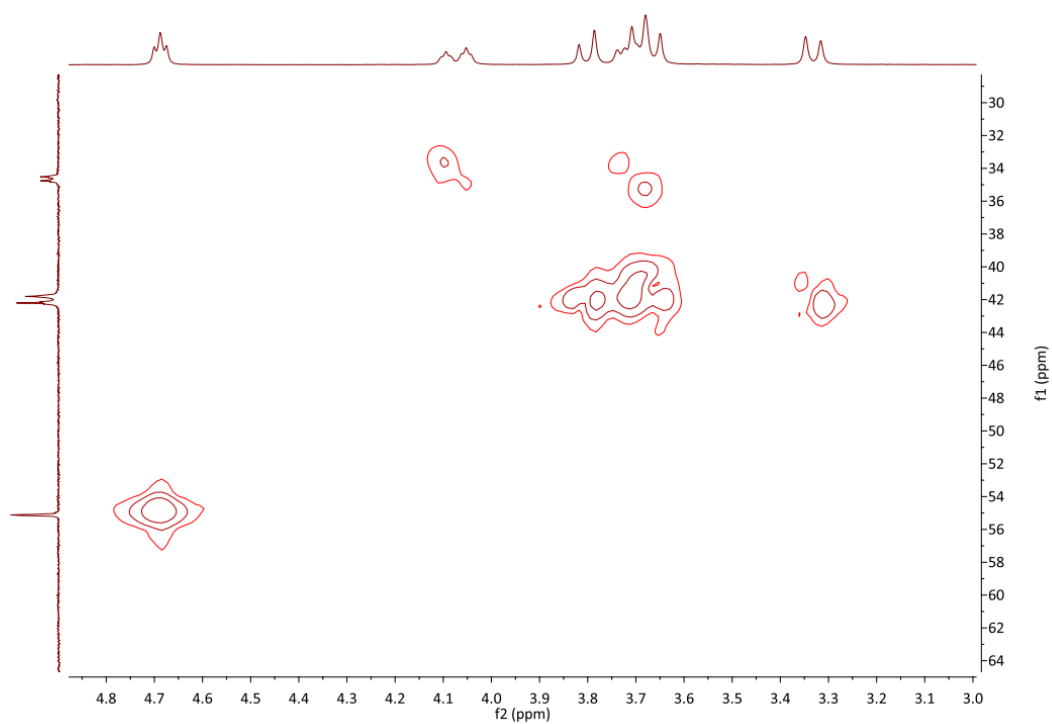

$\text{Cp}^{\text{C}}(\text{BzPPh}_2)_2$  (**3**):

Figure S11:  $^1\text{H}$  NMR spectrum of **3**.

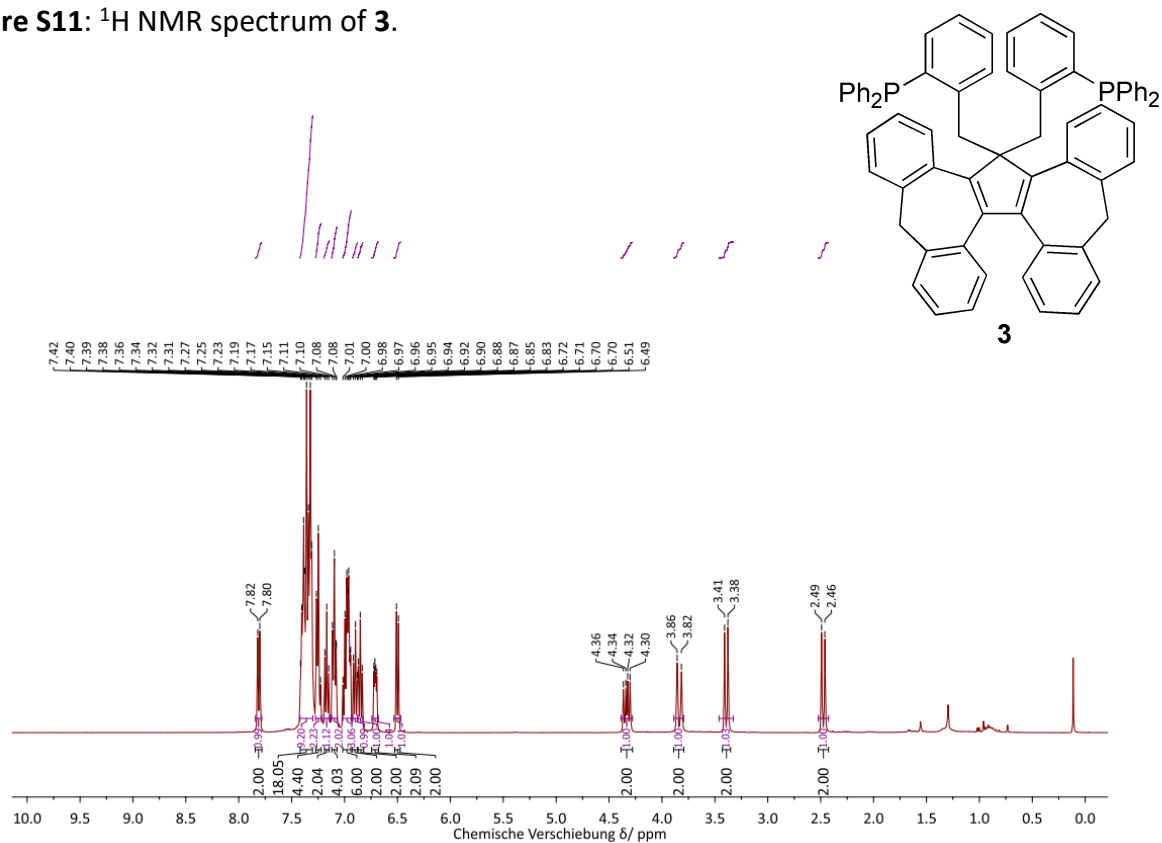

Figure S12:  $^1\text{H}$  NMR spectrum of **3** (expanded).

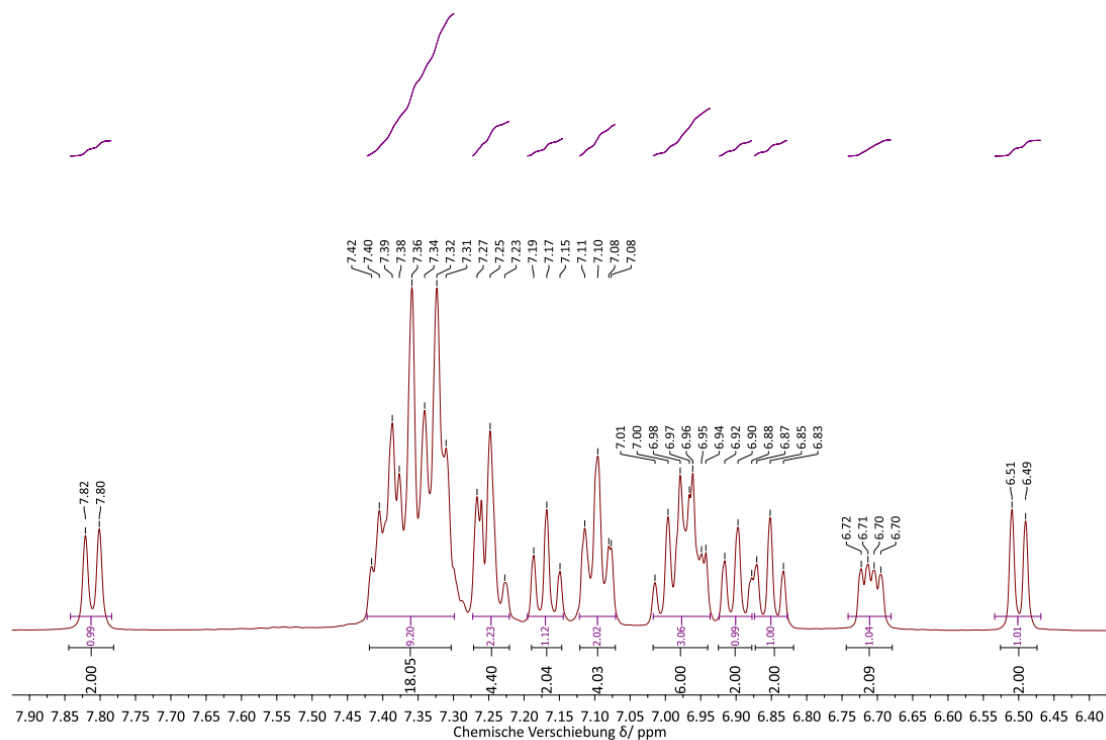

**Figure S13:**  $^{13}\text{C}\{^1\text{H}\}$  NMR spectrum of **3**.

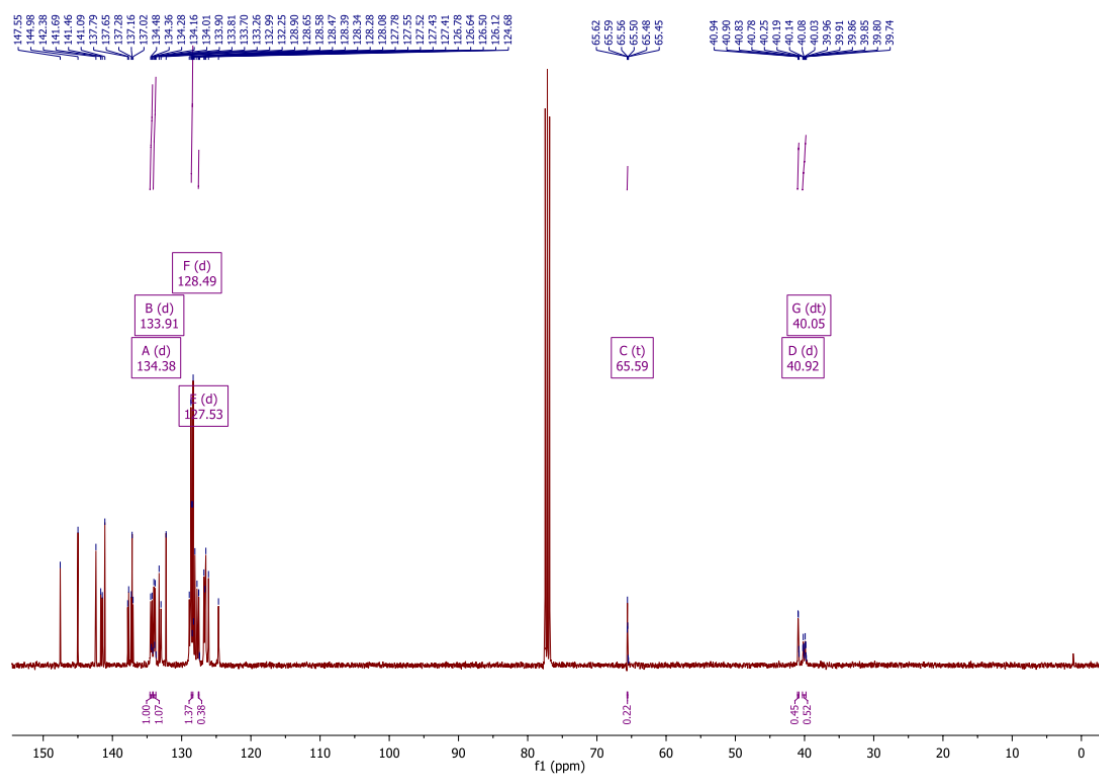

**Figure S14:**  $^{13}\text{C}\{^1\text{H}\}$  NMR spectrum of **3** (expanded).

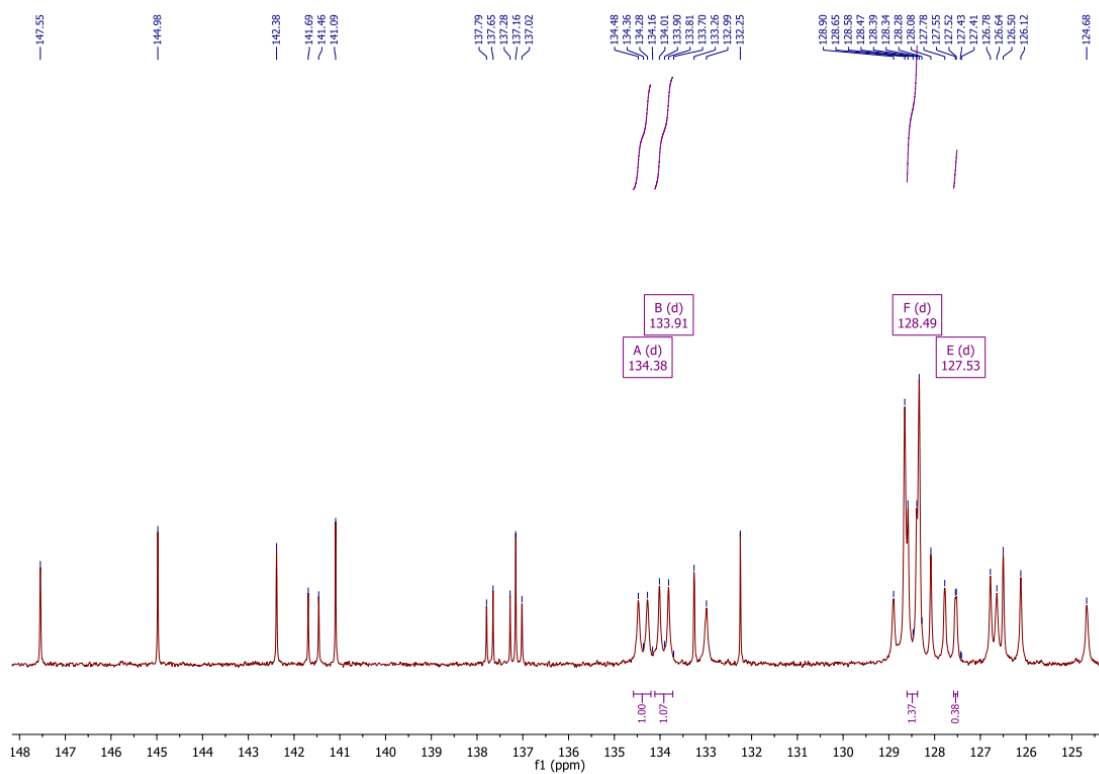



**Figure S15:**  $^{31}\text{P}\{^1\text{H}\}$  NMR spectrum of **3**.

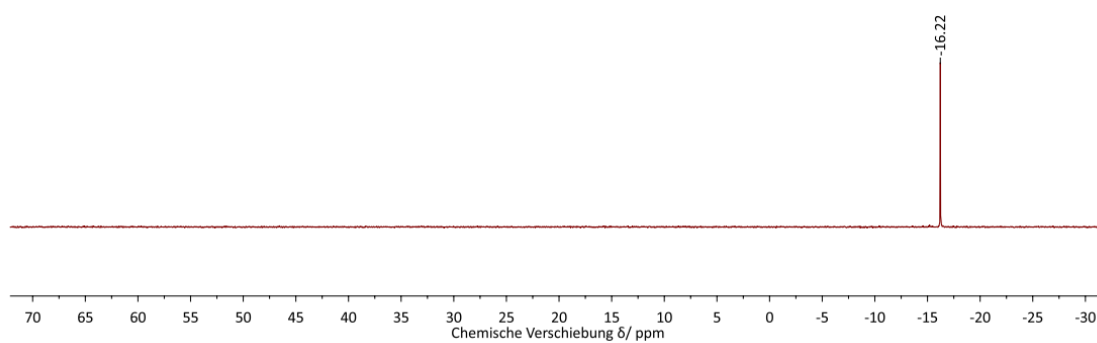

**Figure S16:** H,H-COSY NMR spectrum of **3**.

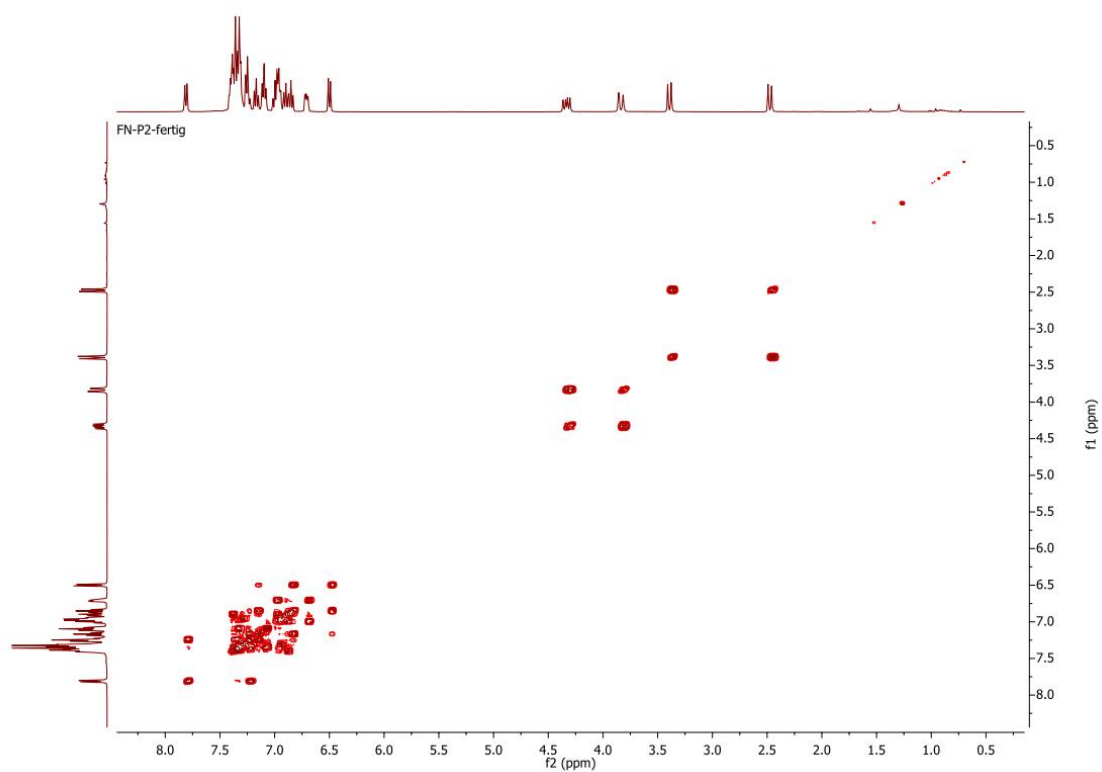

**Figure S17:** H,H-COSY NMR spectrum of **3** (expanded).

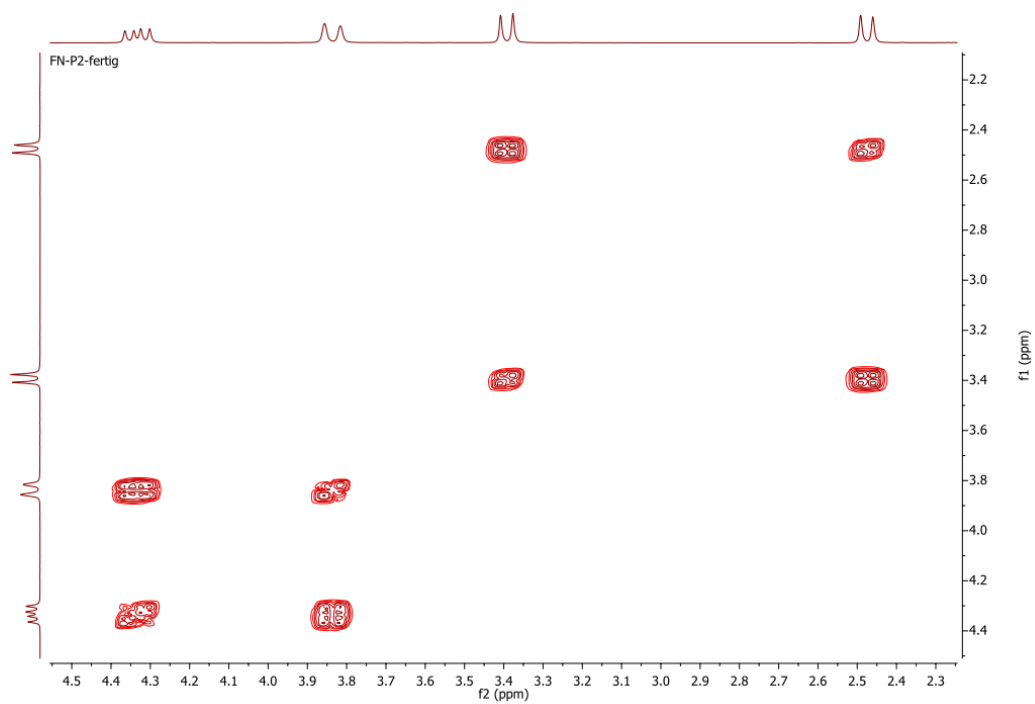

**Figure S18:** H,H-COSY NMR spectrum of **3** (expanded).

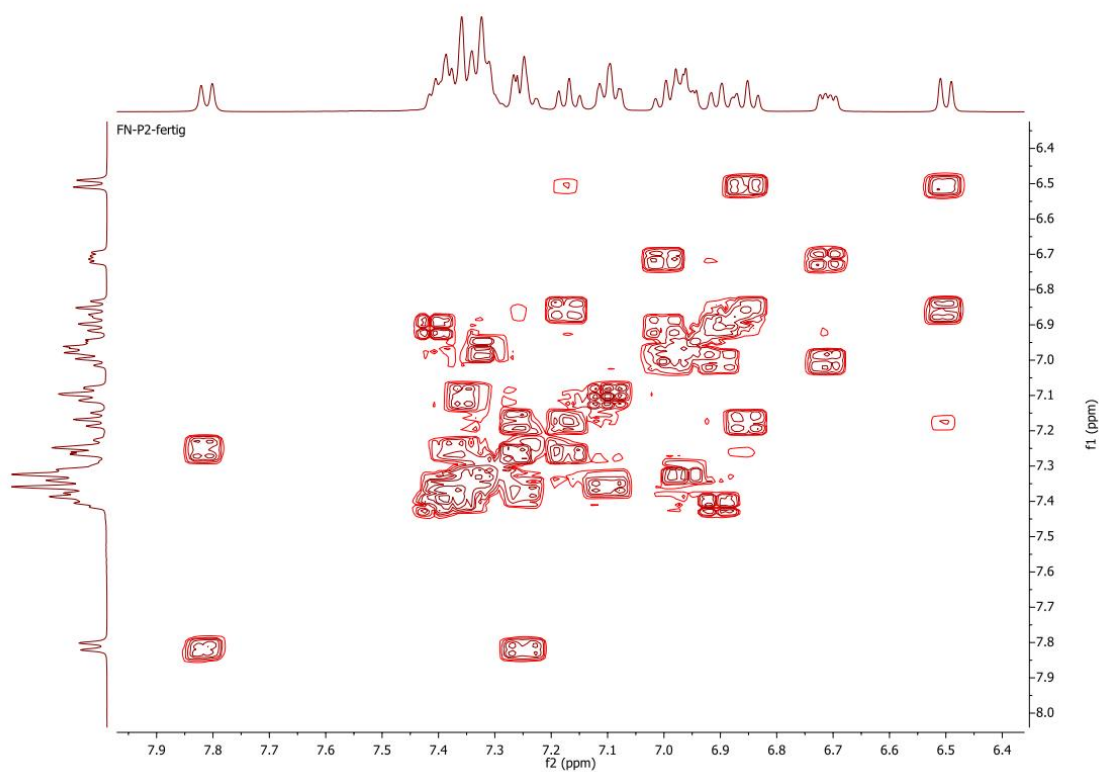

**Figure S19:** HMQC NMR spectrum of **3**.

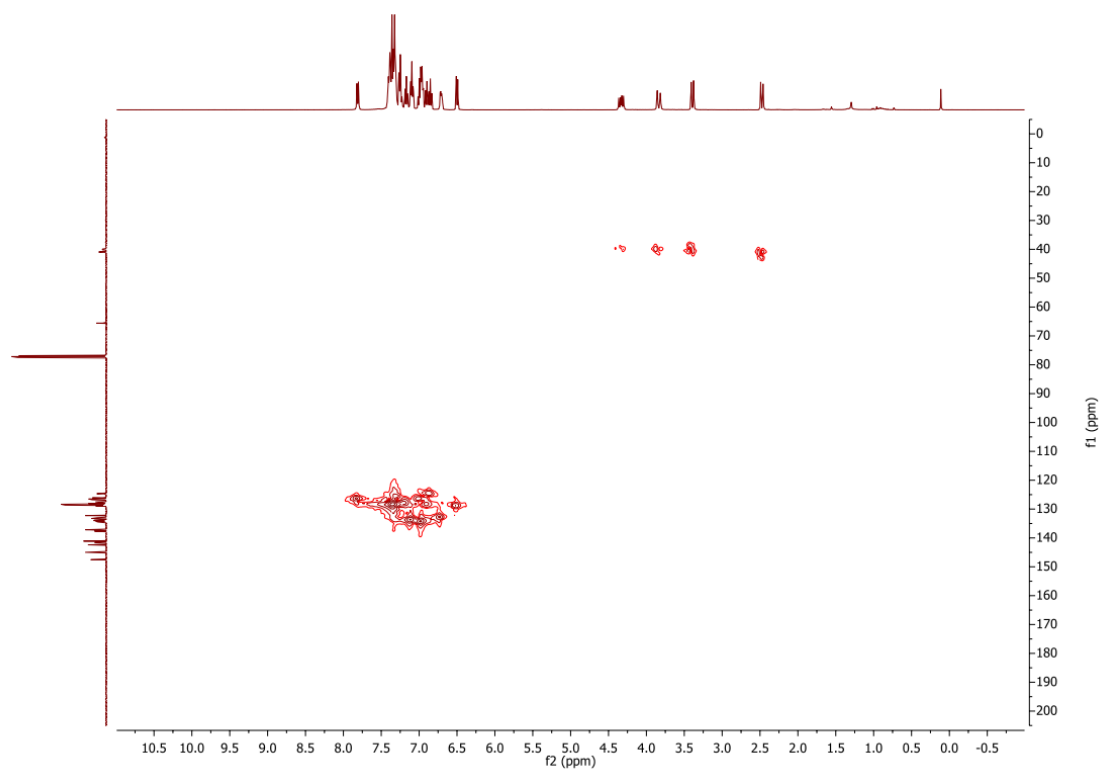

**Figure S20:** HMQC NMR spectrum of **3** (expanded).

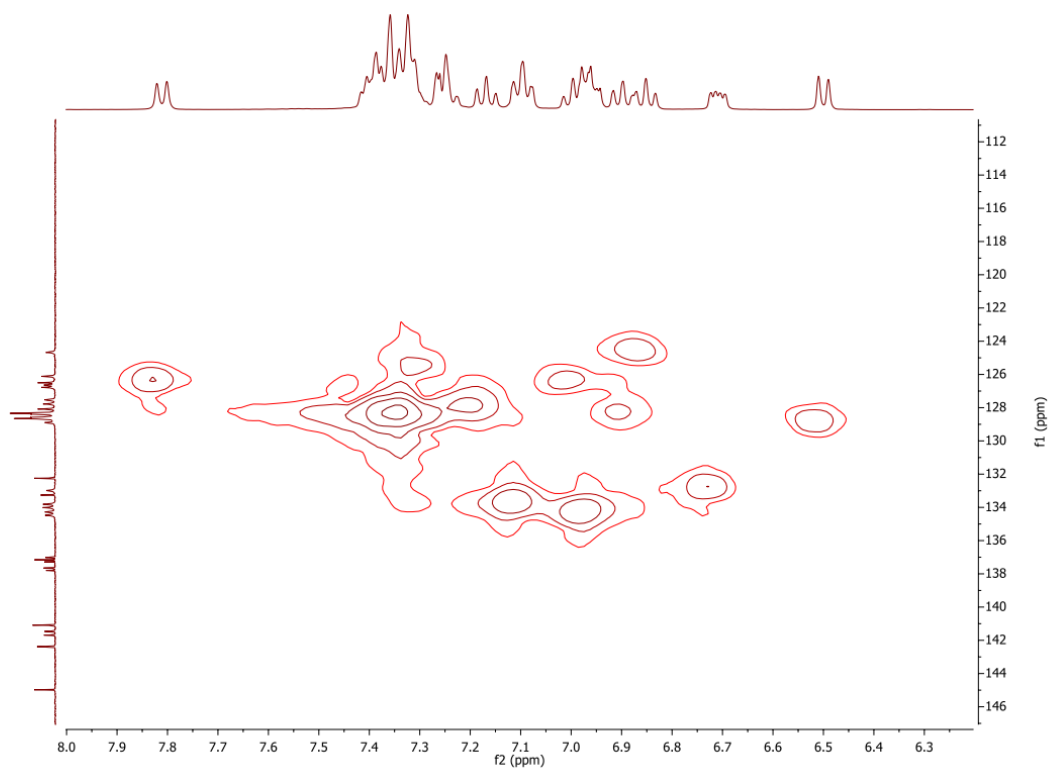

**Figure S21:**  $^1\text{H}$  NMR spectrum of **4**.

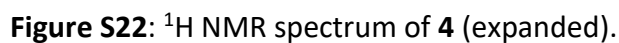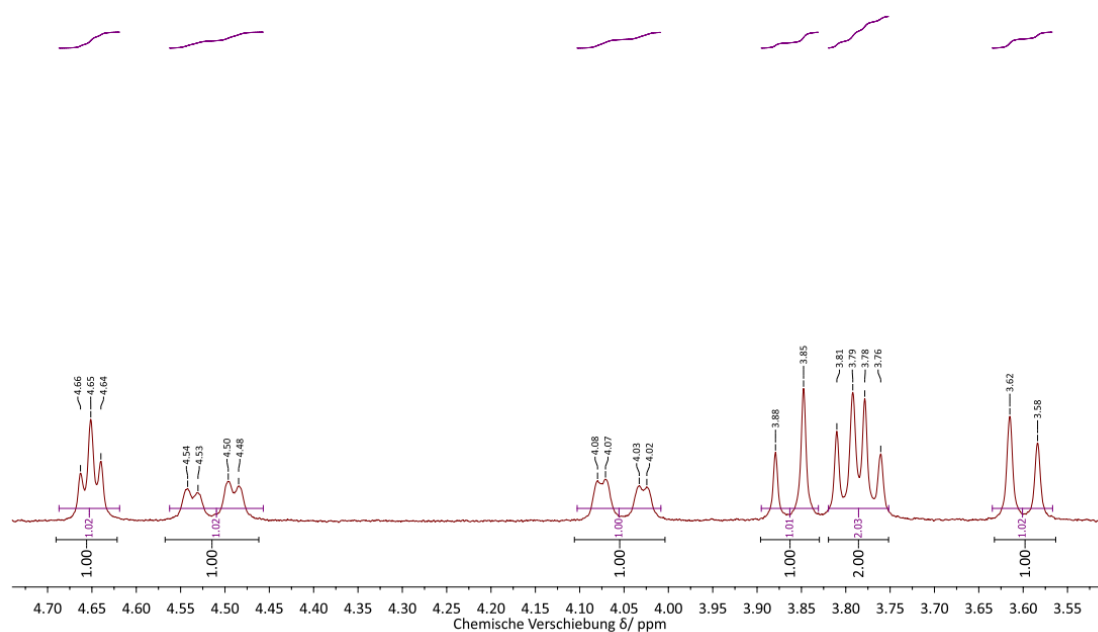

**Figure S23:**  $^1\text{H}$  NMR spectrum of **4** (expanded).

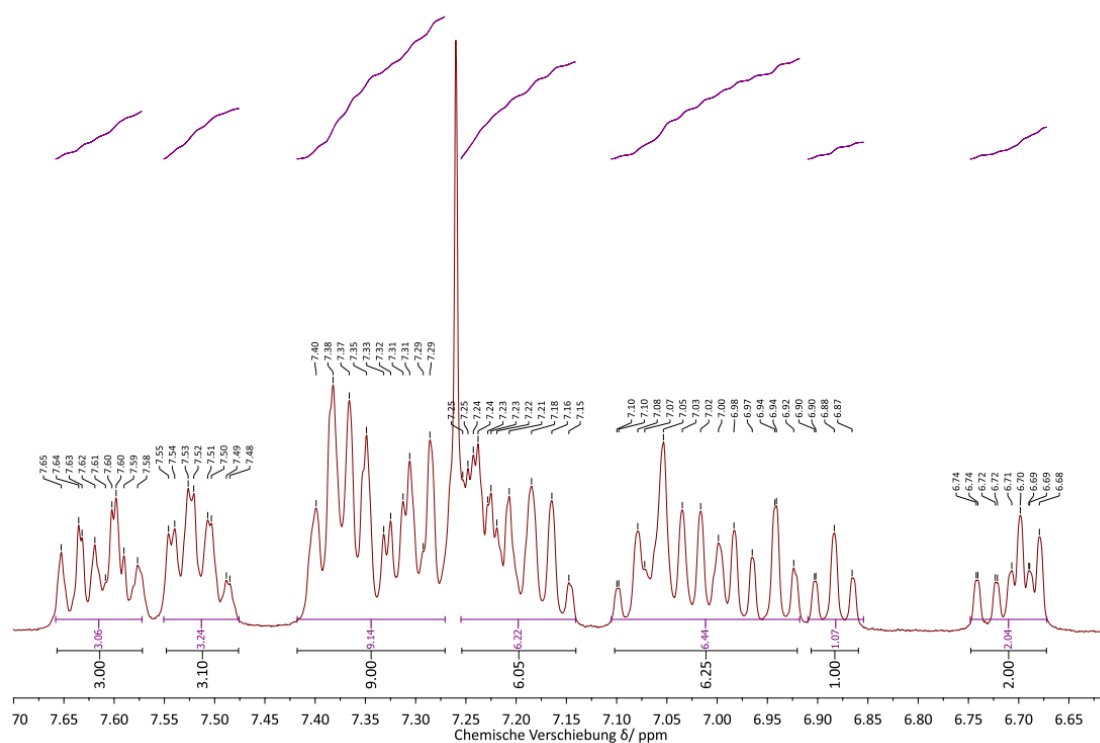

**Figure S24:**  $^{13}\text{C}\{^1\text{H}\}$  NMR spectrum of **4**.

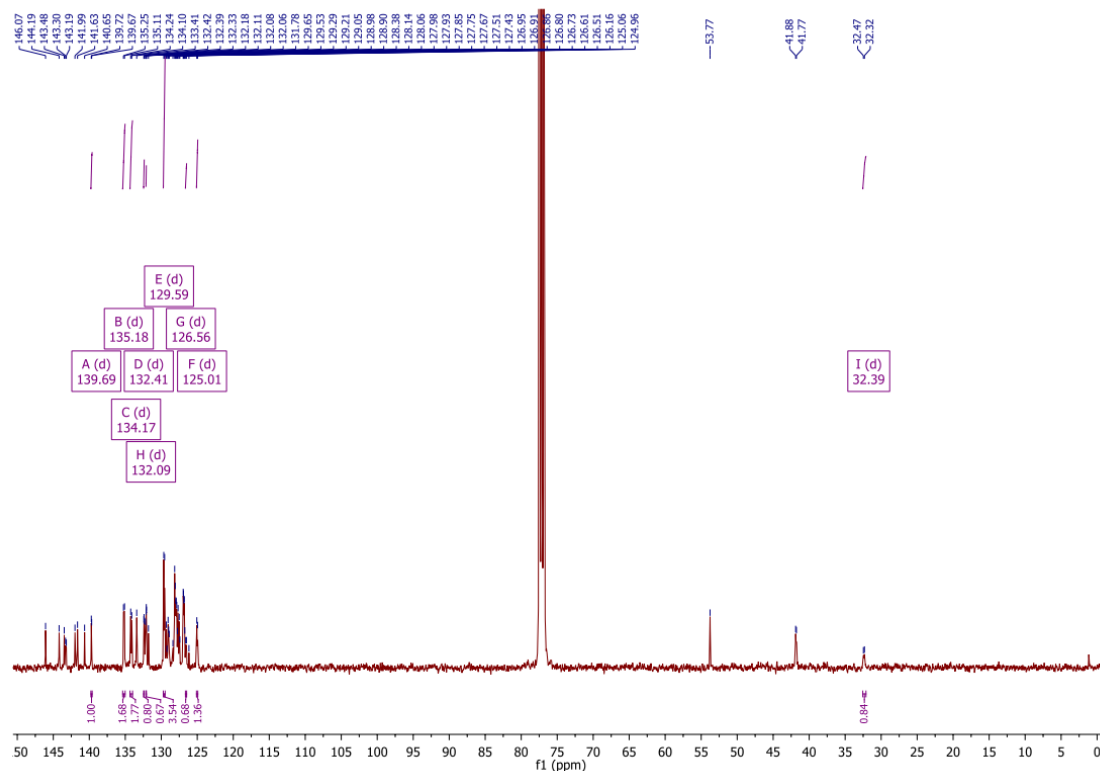

**Figure S25:**  $^{13}\text{C}\{^1\text{H}\}$  NMR spectrum of **4** (expanded).

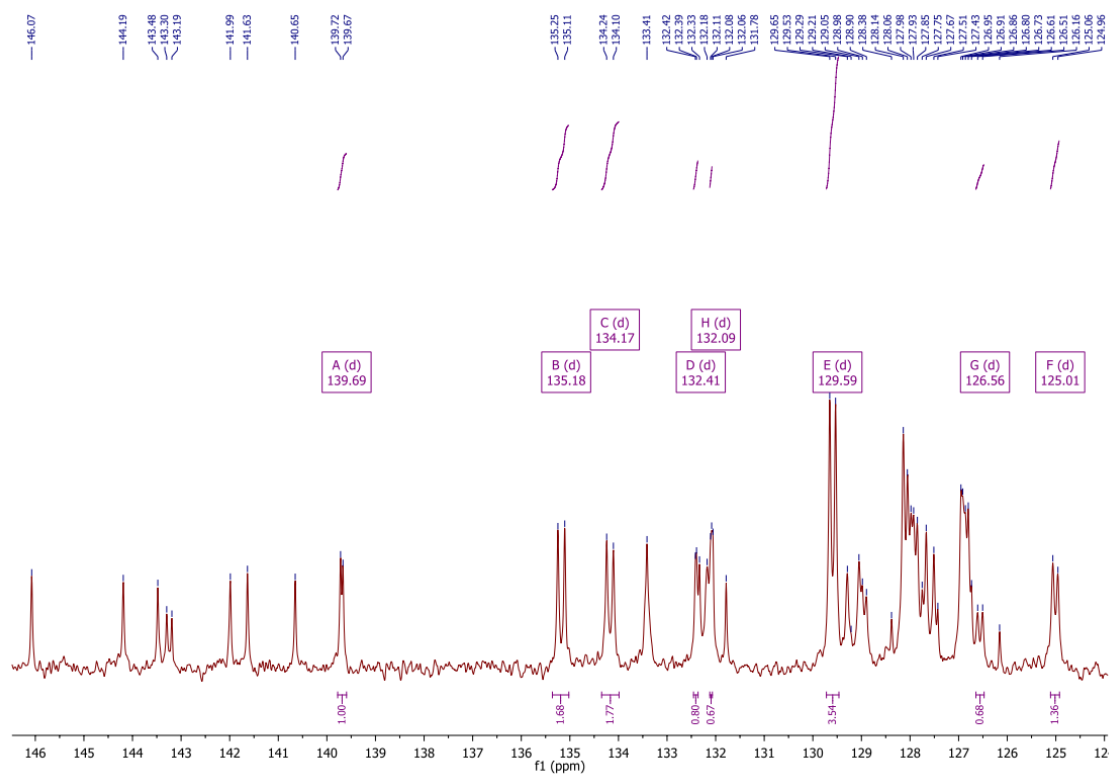

**Figure S26:**  $^{31}\text{P}\{^1\text{H}\}$  NMR spectrum of **4**.

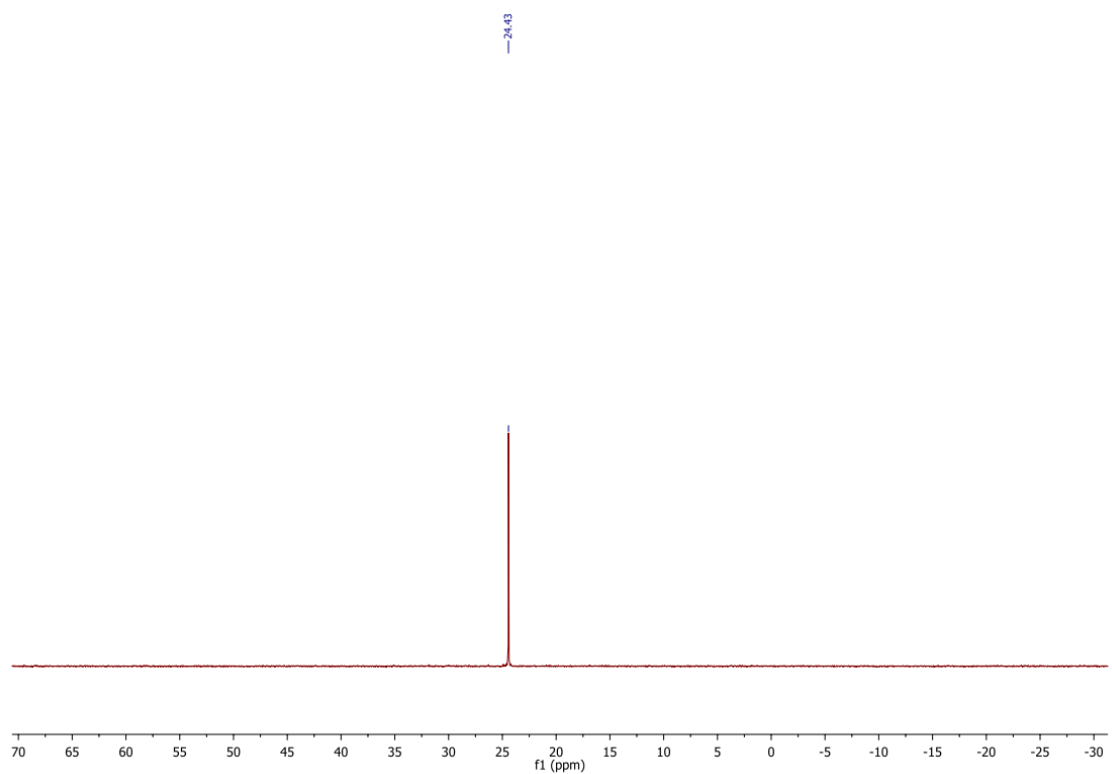

**Figure S27:** H,H-COSY NMR spectrum of **4**.

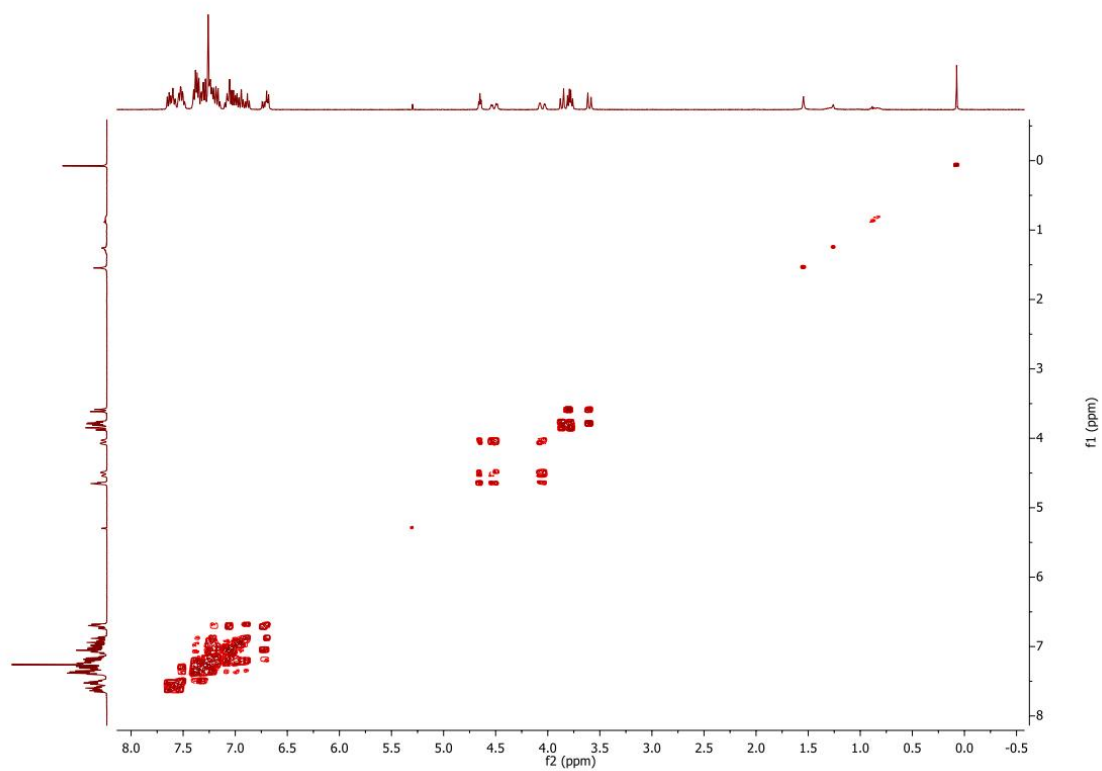

**Figure S28:** H,H-COSY NMR spectrum of **4** (expanded).

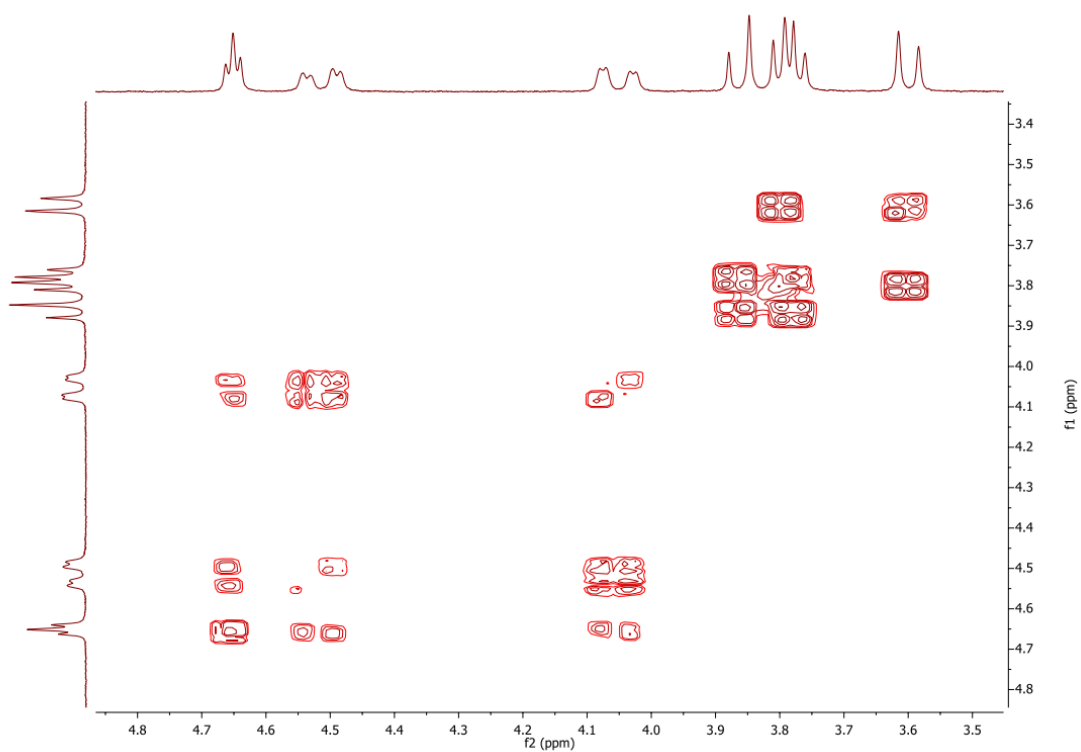

**Figure S29:** H,H-COSY NMR spectrum of **4** (expanded).

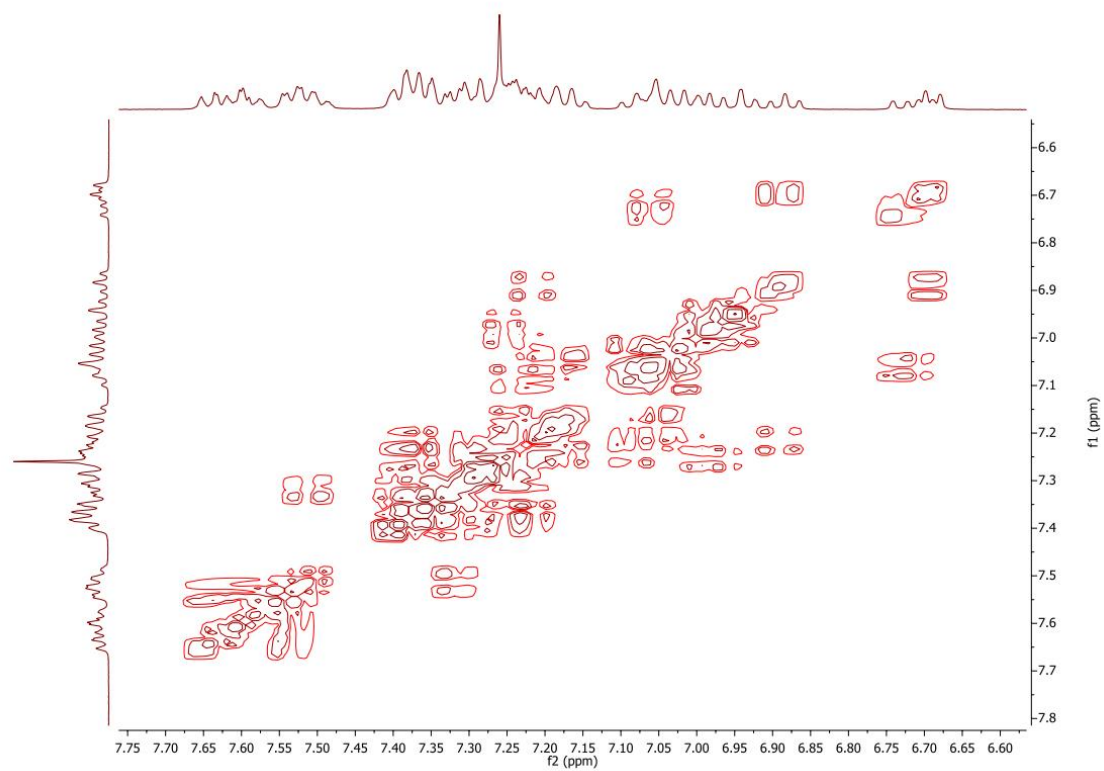

**Figure S30:** HMQC NMR spectrum of **4**.

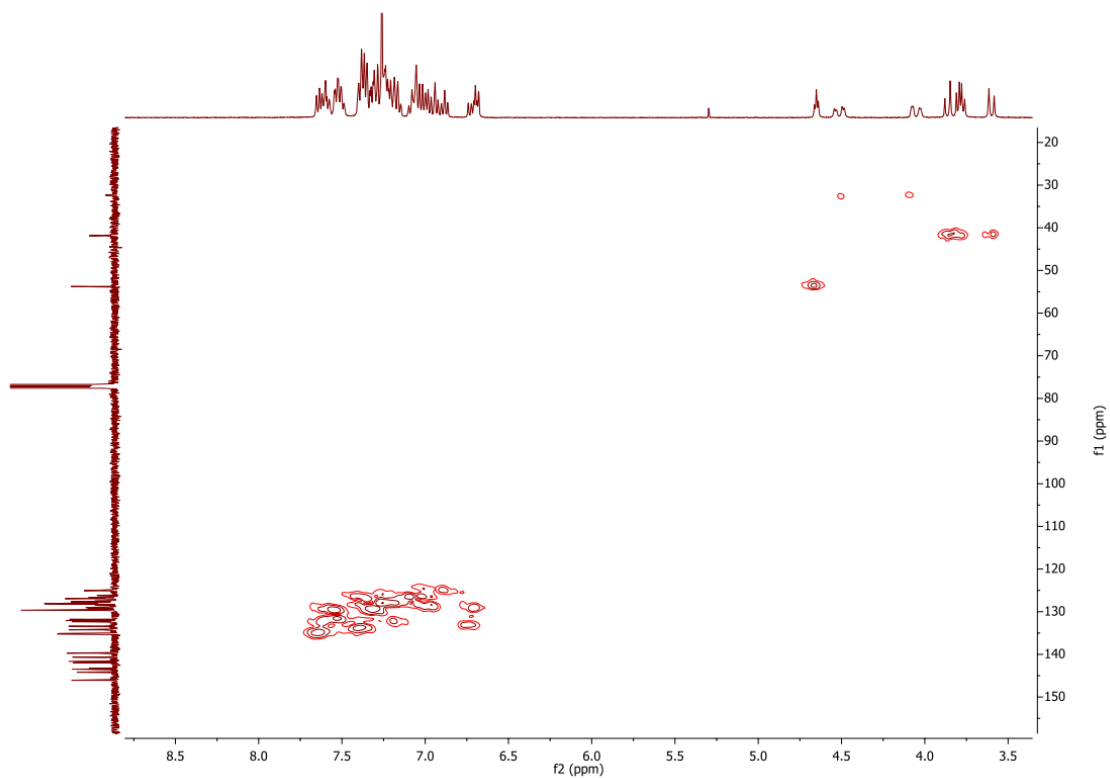



**Figure S31:** HMQC NMR spectrum of **4** (expanded).

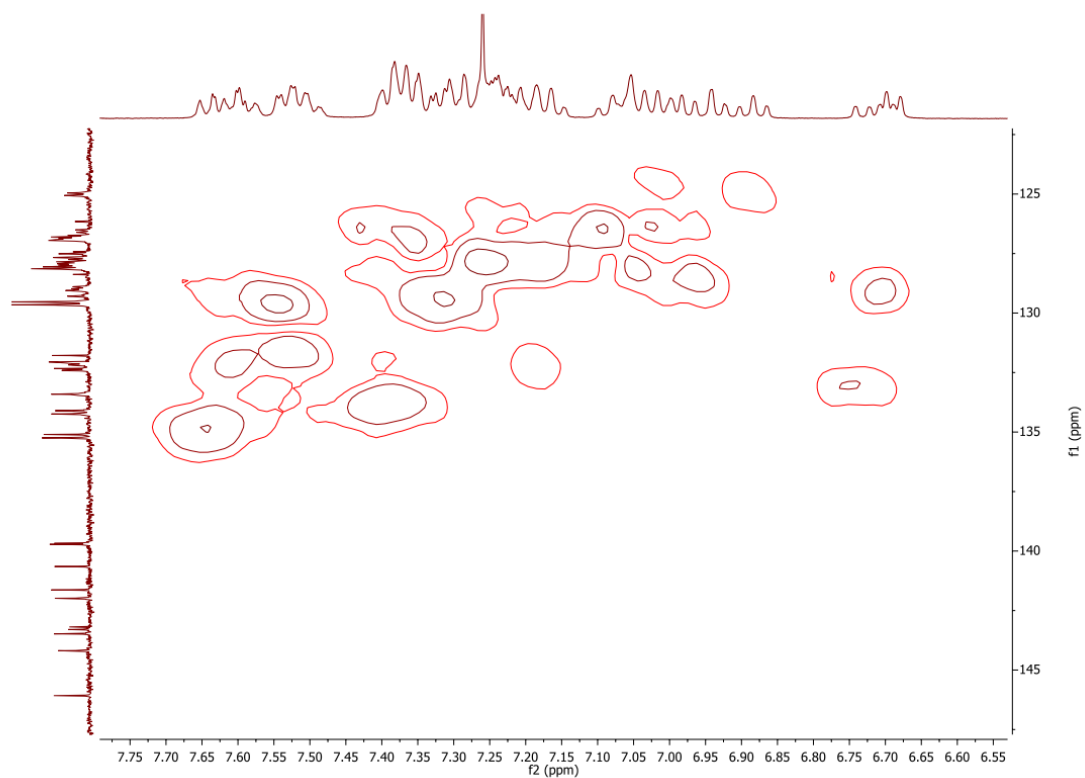

**[[ $\eta^5$ -Cp<sup>C</sup>HBzPPh<sub>2</sub>]<sup>+</sup>Tl<sup>-</sup> (**5**):**

**Figure S32:** <sup>1</sup>H NMR spectrum of **5**.

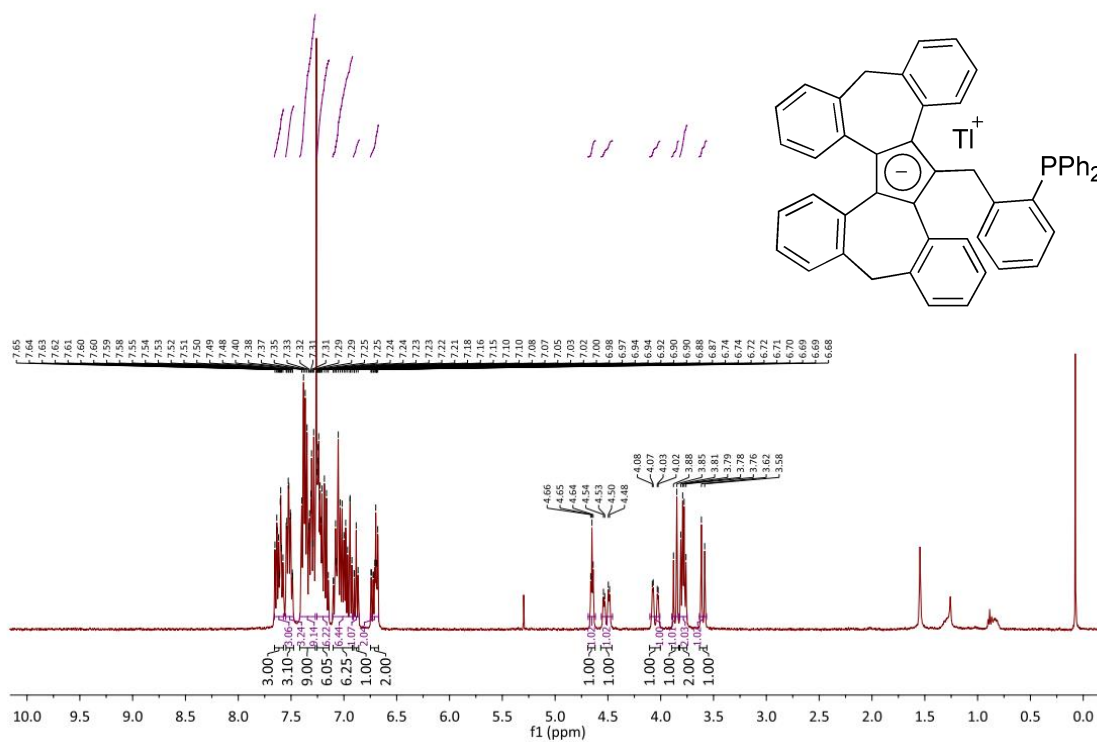

Figure S33:  $^1\text{H}$  NMR spectrum of **5** (expanded).

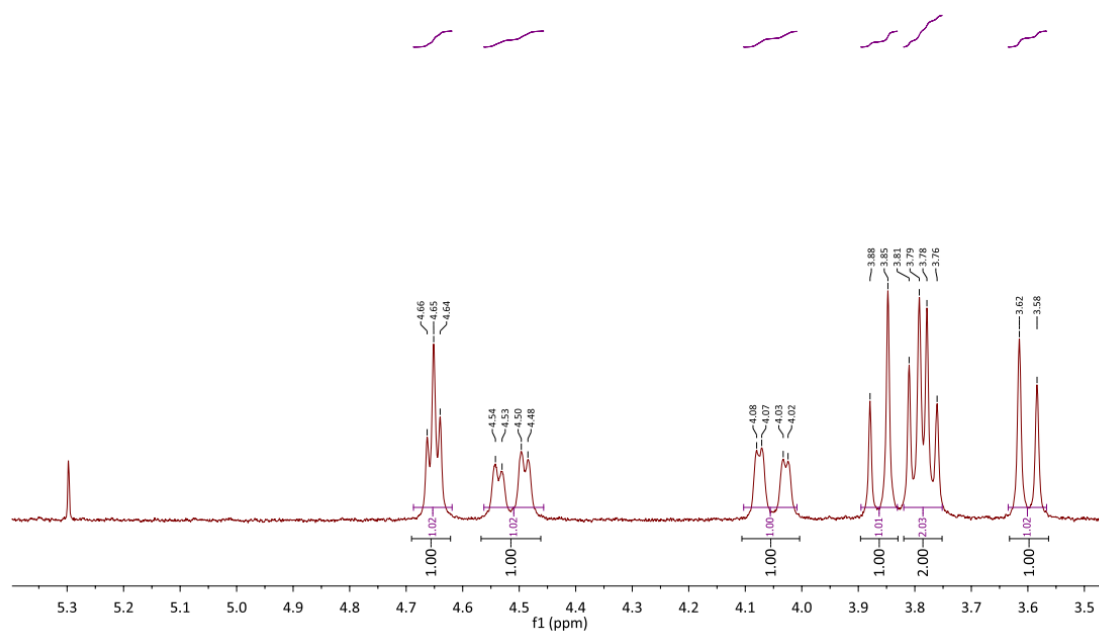

Figure S34:  $^1\text{H}$  NMR spectrum of **5** (expanded).

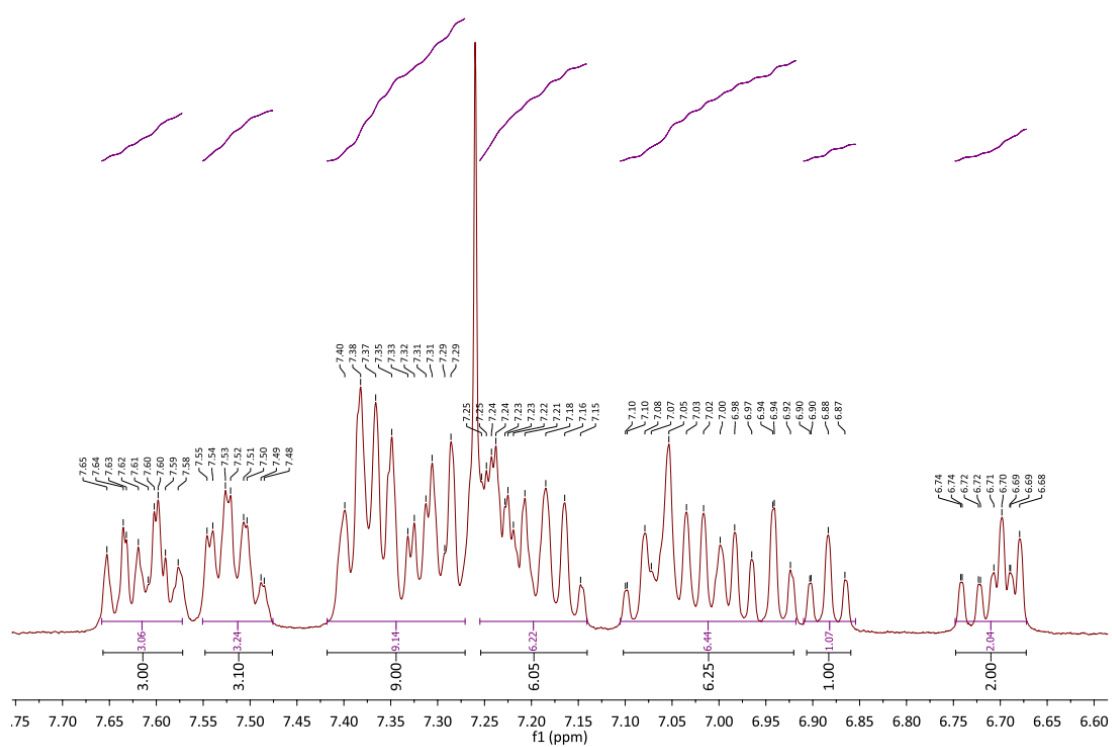

Figure S35:  $^{13}\text{C}\{^1\text{H}\}$  NMR spectrum of **5**.

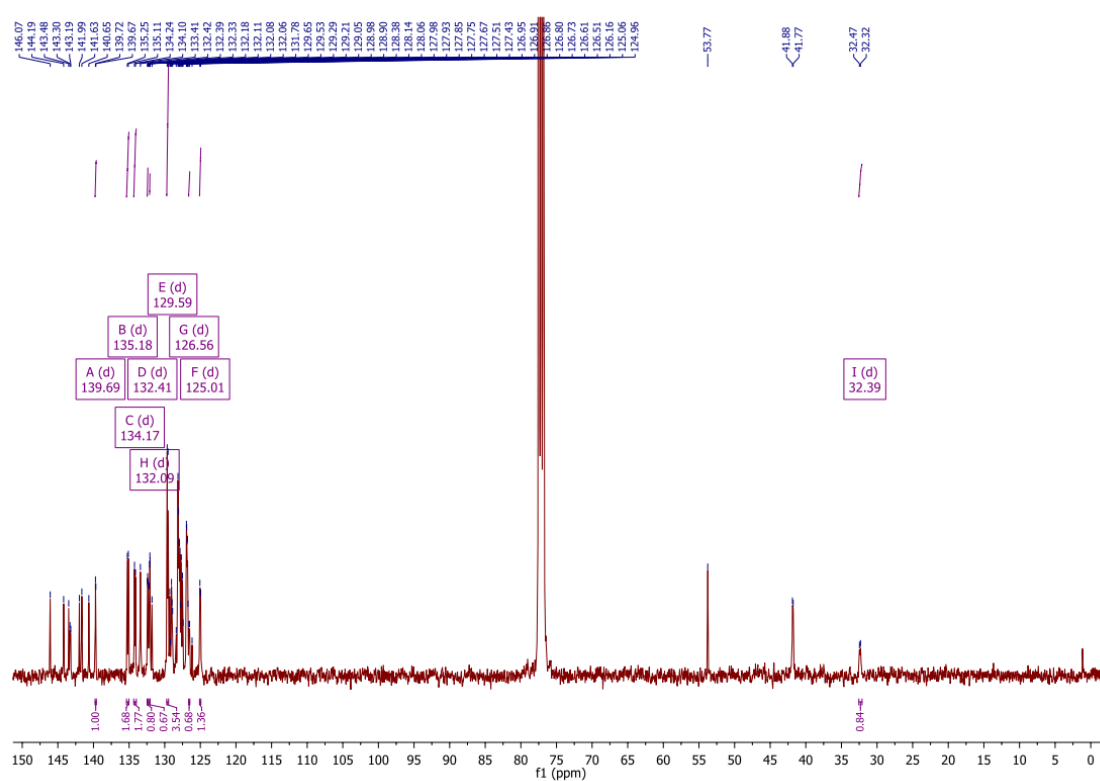

Figure S36:  $^{13}\text{C}\{^1\text{H}\}$  NMR spectrum of **5** (expanded).

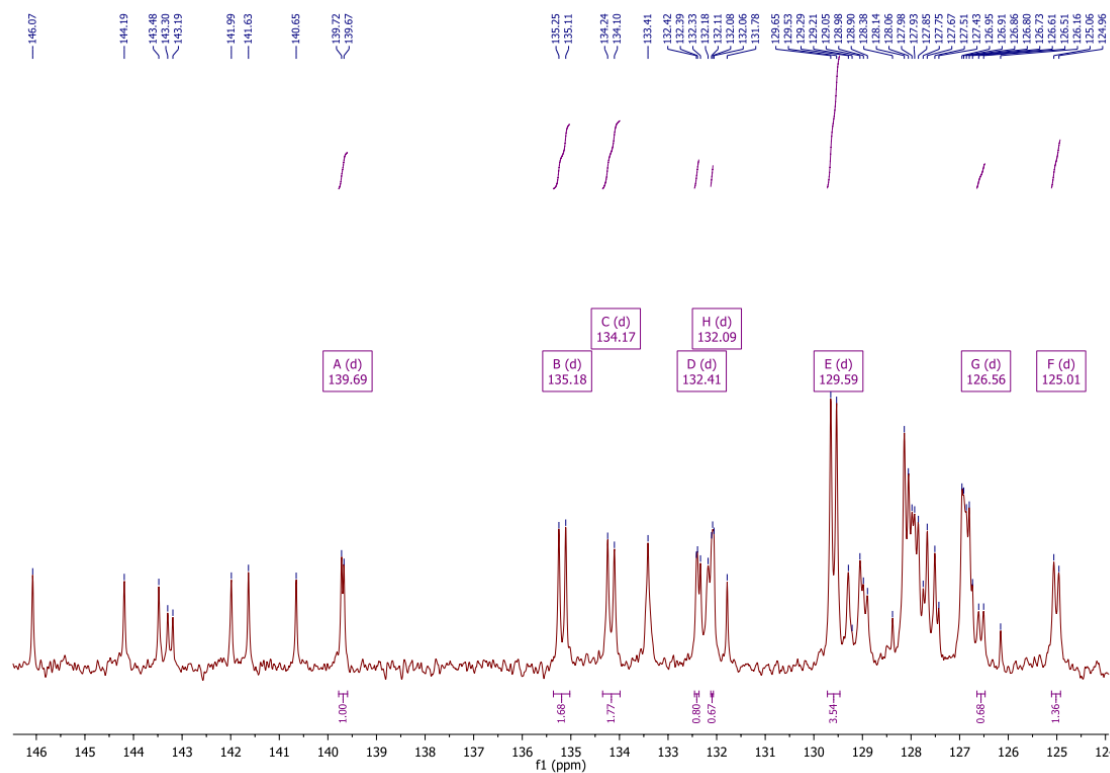

**Figure S37:**  $^{31}\text{P}\{^1\text{H}\}$  NMR spectrum of **5**.

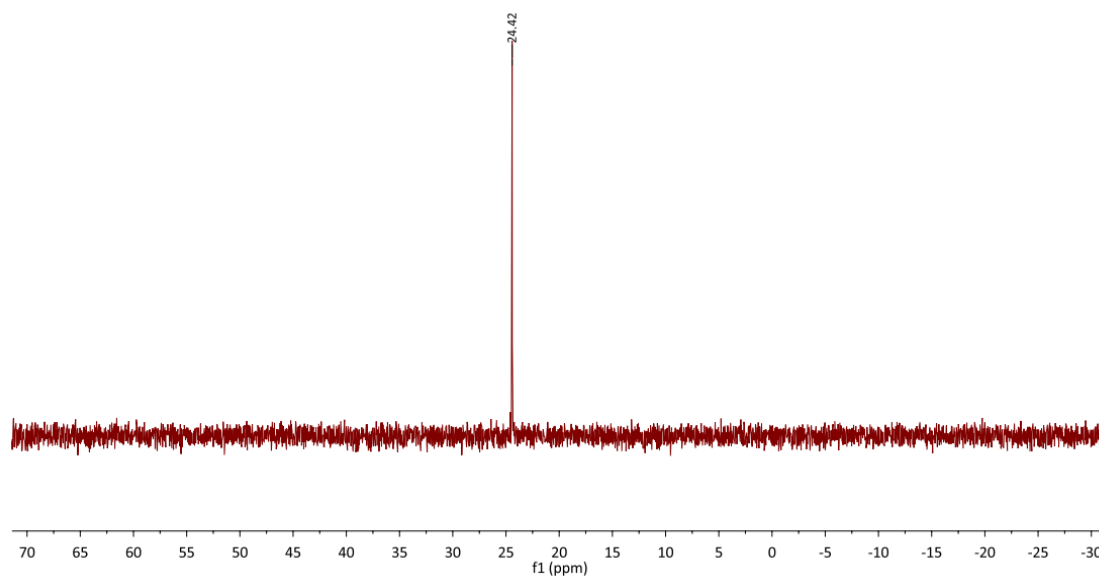

**Figure S38:** H,H-COSY NMR spectrum of **5**.

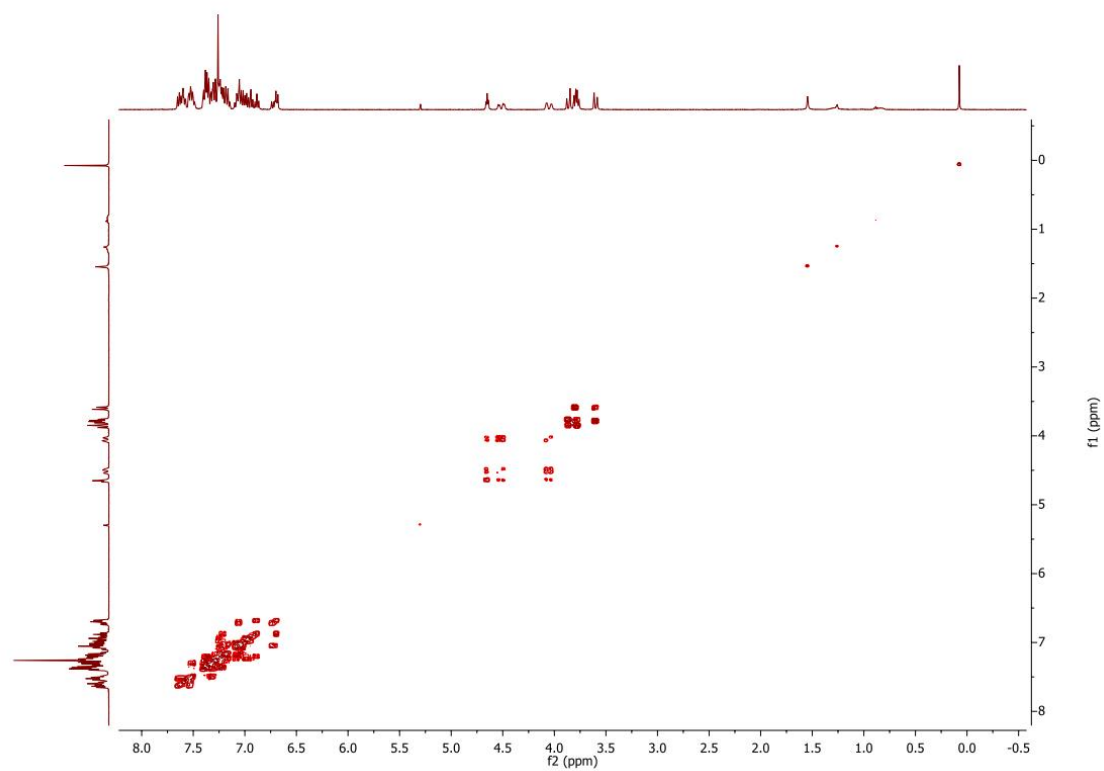

**Figure S39:** H,H-COSY NMR spectrum of **5** (expanded).

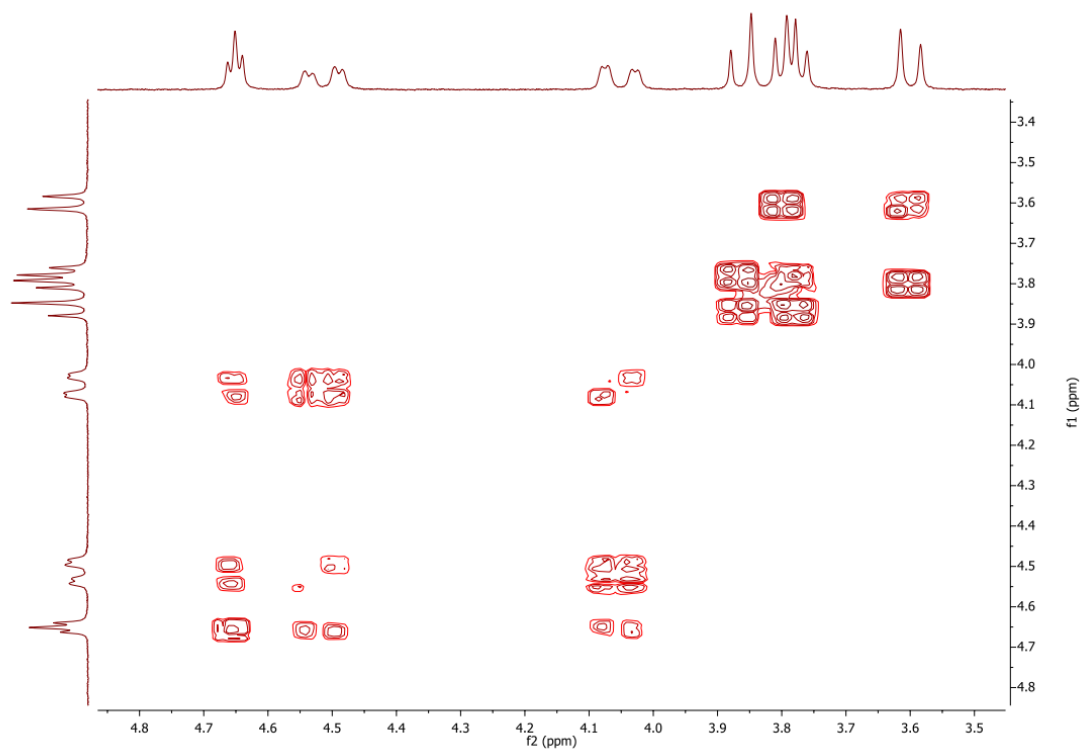

**Figure S40:** H,H-COSY NMR spectrum of **5** (expanded).

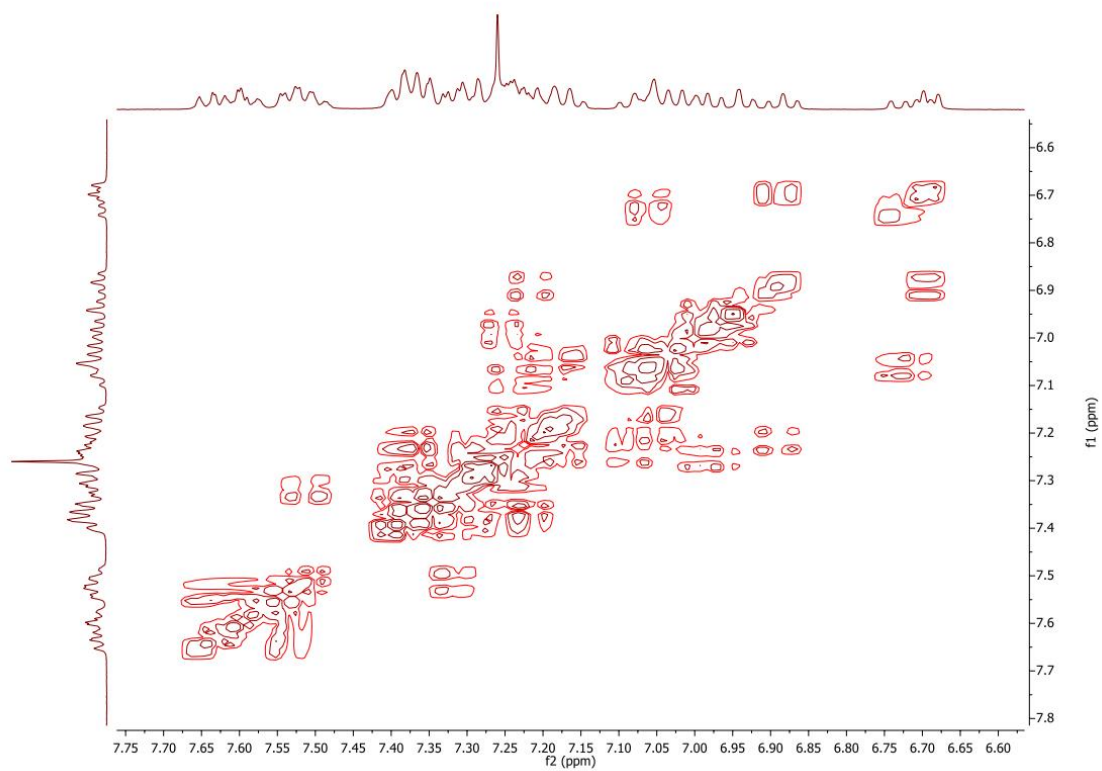

**Figure S41:** HMQC NMR spectrum of **5**.

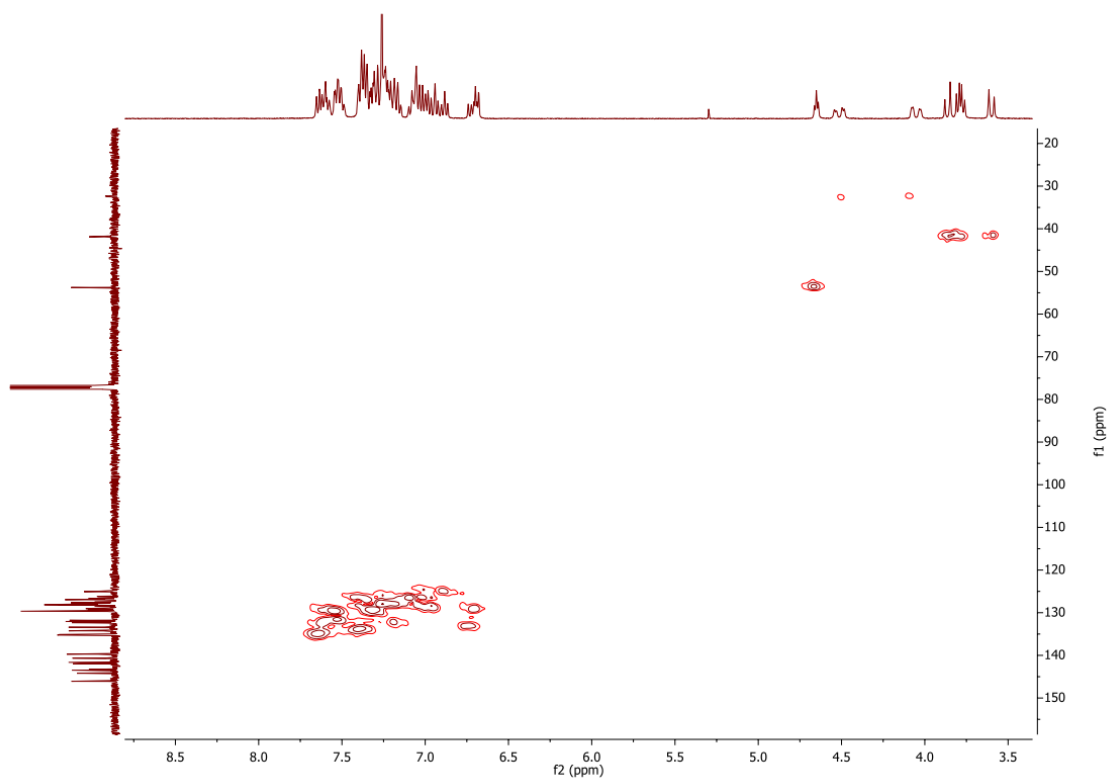

**Figure S42:** HMQC NMR spectrum of **5** (expanded).

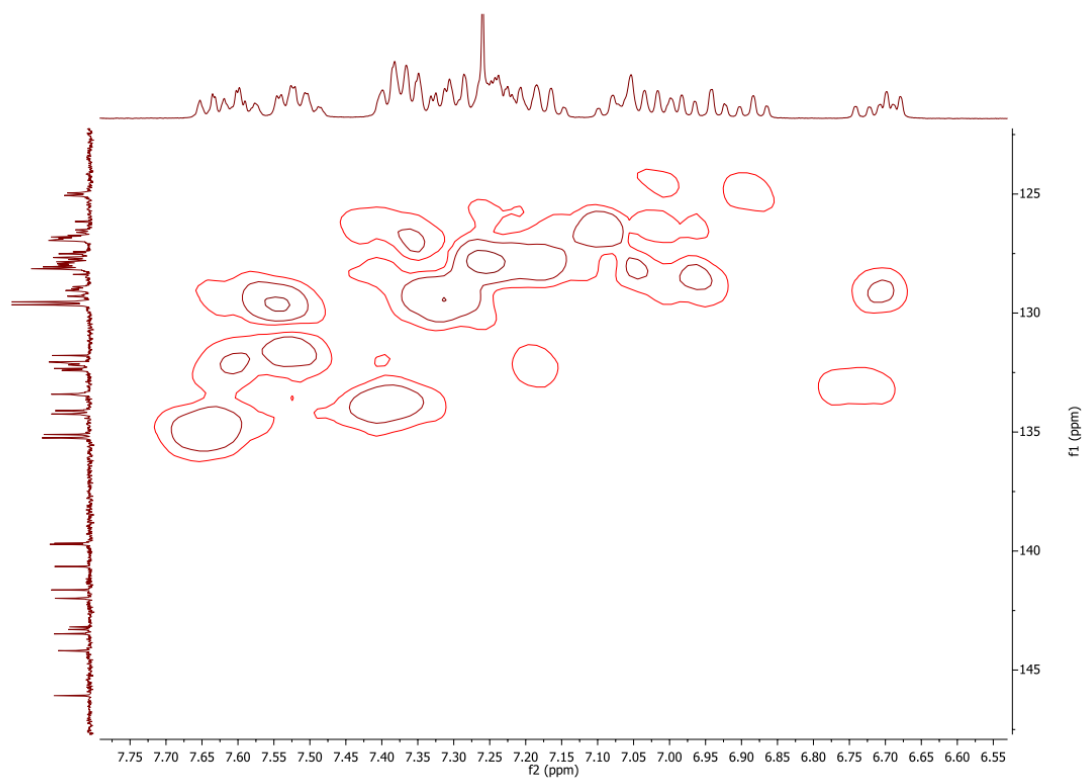

**$[(\eta^5\text{-Cp}^t\text{BzPPh}_2)\text{Ru}(\text{NCMe})_2]\text{PF}_6$  (6):**

**Figure S43:**  $^1\text{H}$  NMR spectrum of **6**.

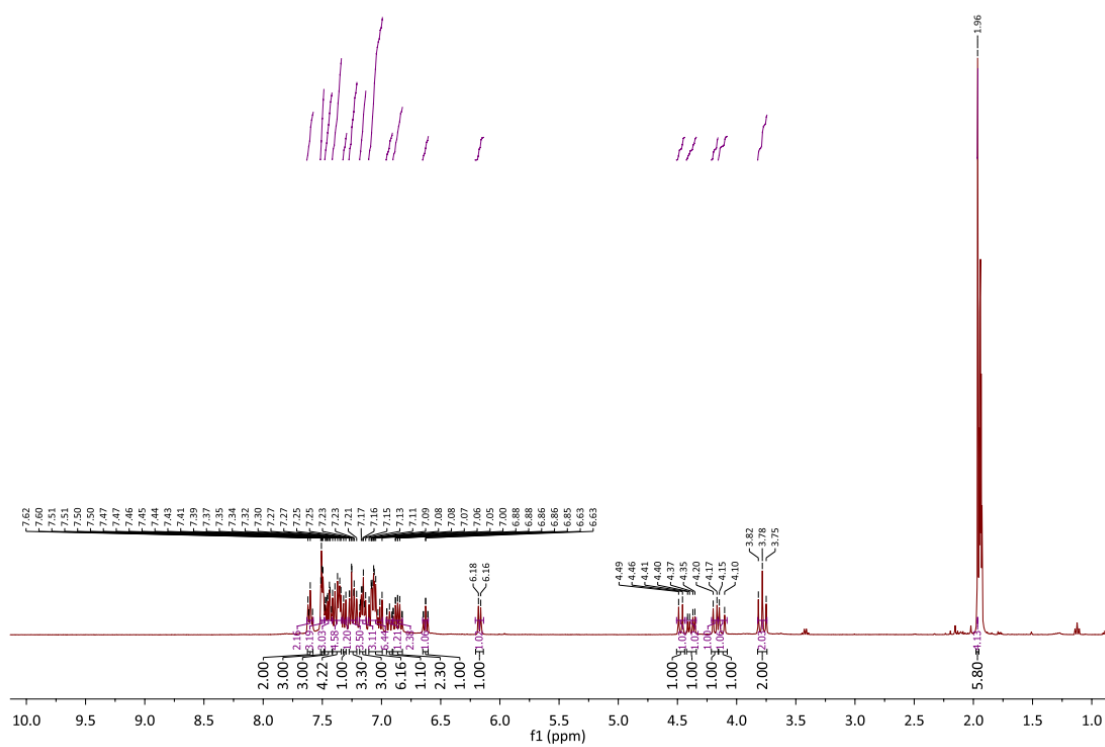

**Figure S44:**  $^1\text{H}$  NMR spectrum of **6** (expanded).

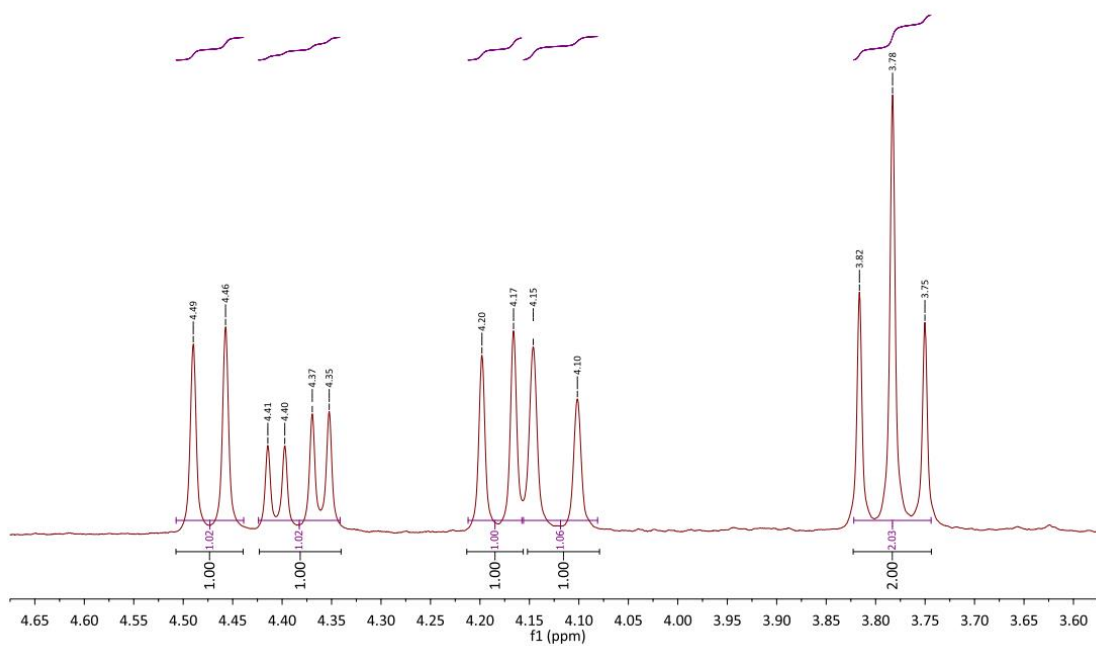

Figure S45:  $^1\text{H}$  NMR spectrum of **6** (expanded).

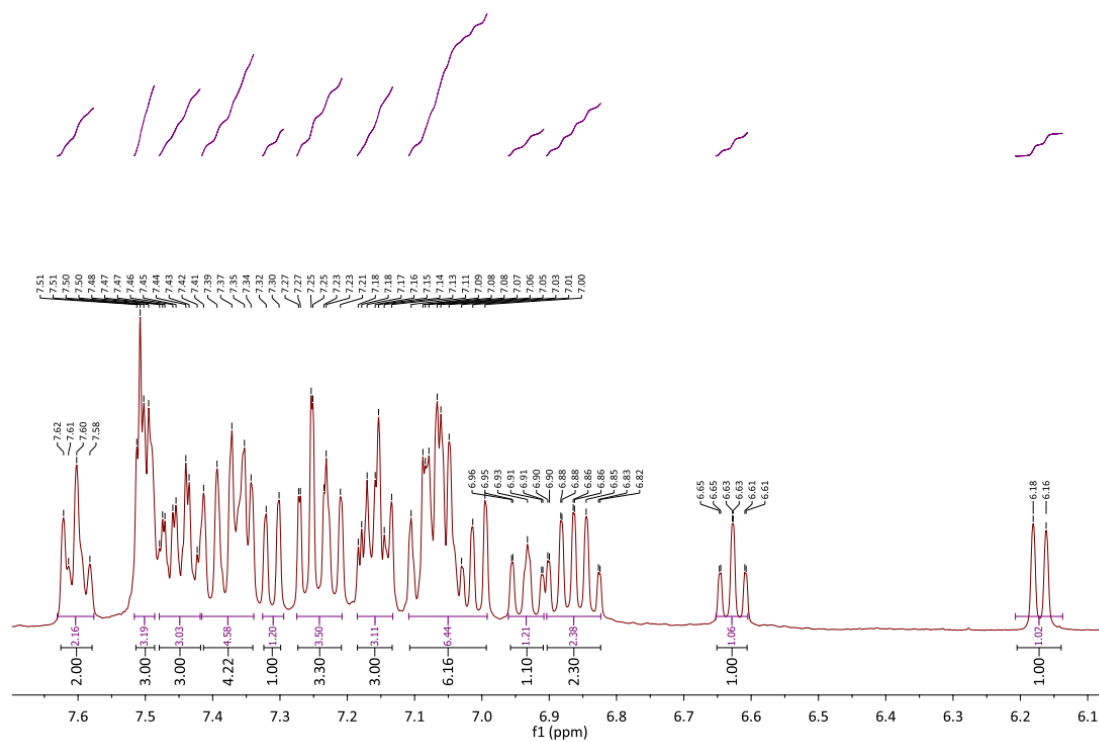

Figure S46:  $^{13}\text{C}\{^1\text{H}\}$  NMR spectrum of **6**.

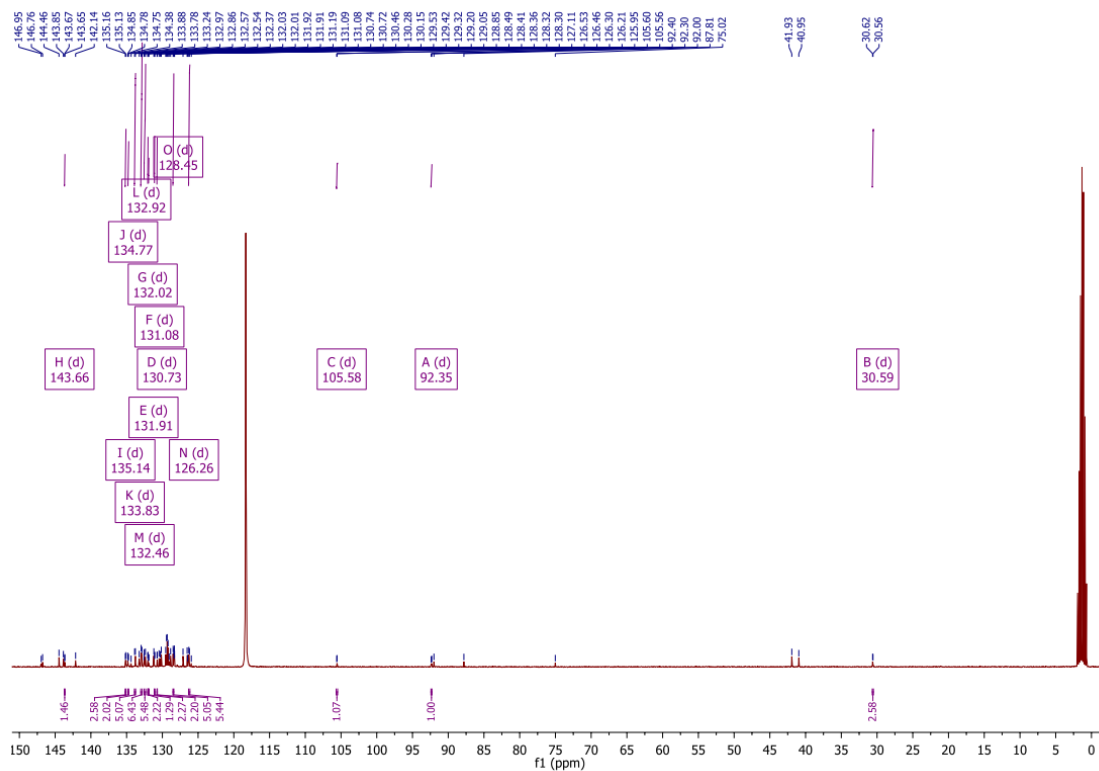



**Figure S47:**  $^{13}\text{C}\{^1\text{H}\}$  NMR spectrum of **6** (expanded).

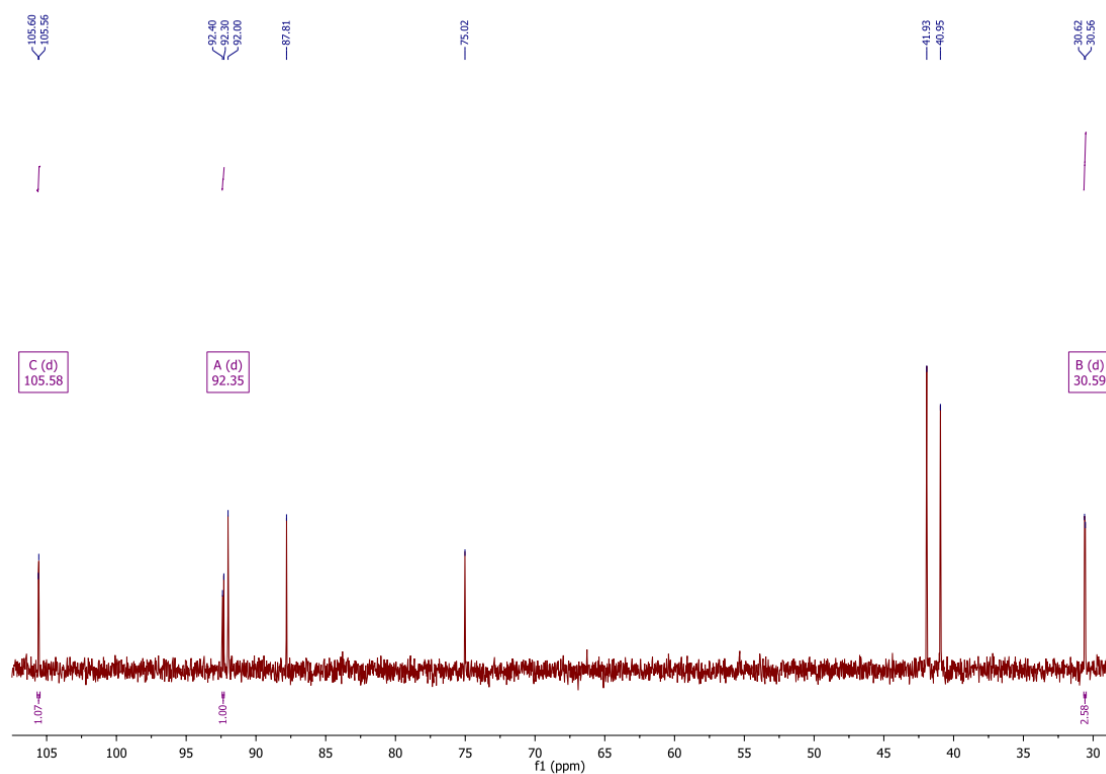

**Figure S48:**  $^{13}\text{C}\{^1\text{H}\}$  NMR spectrum of **6** (expanded).

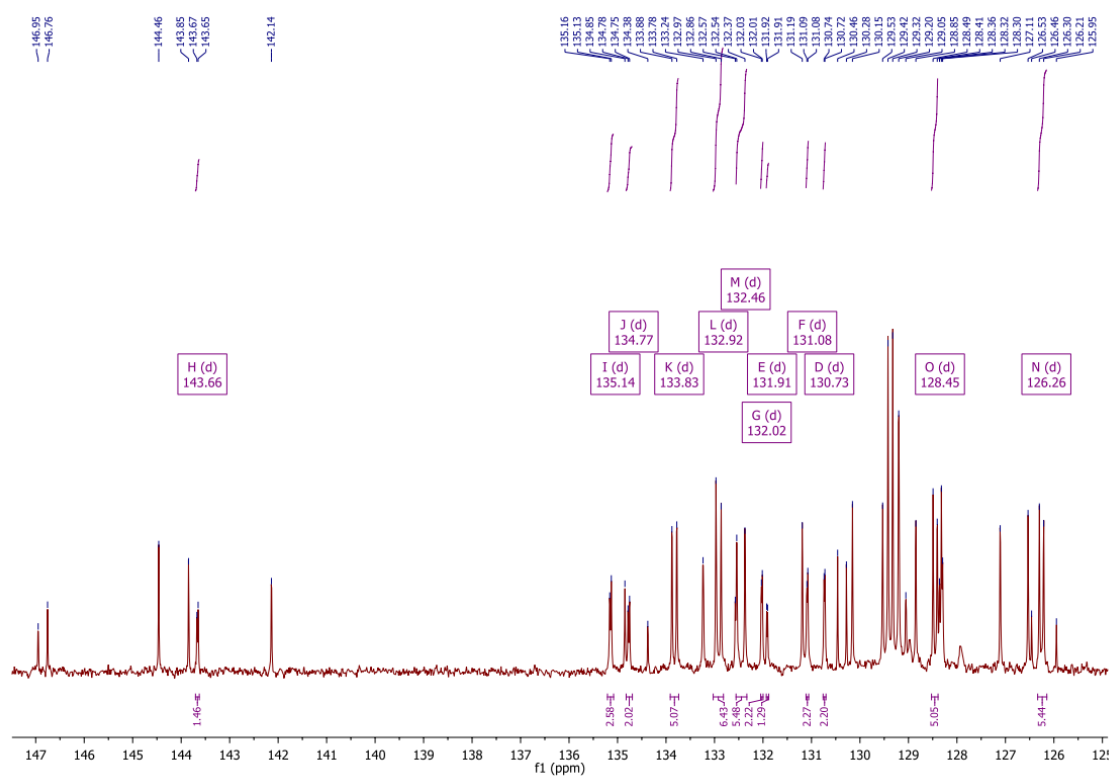

**Figure S49:**  $^{31}\text{P}\{^1\text{H}\}$  NMR spectrum of **6**.

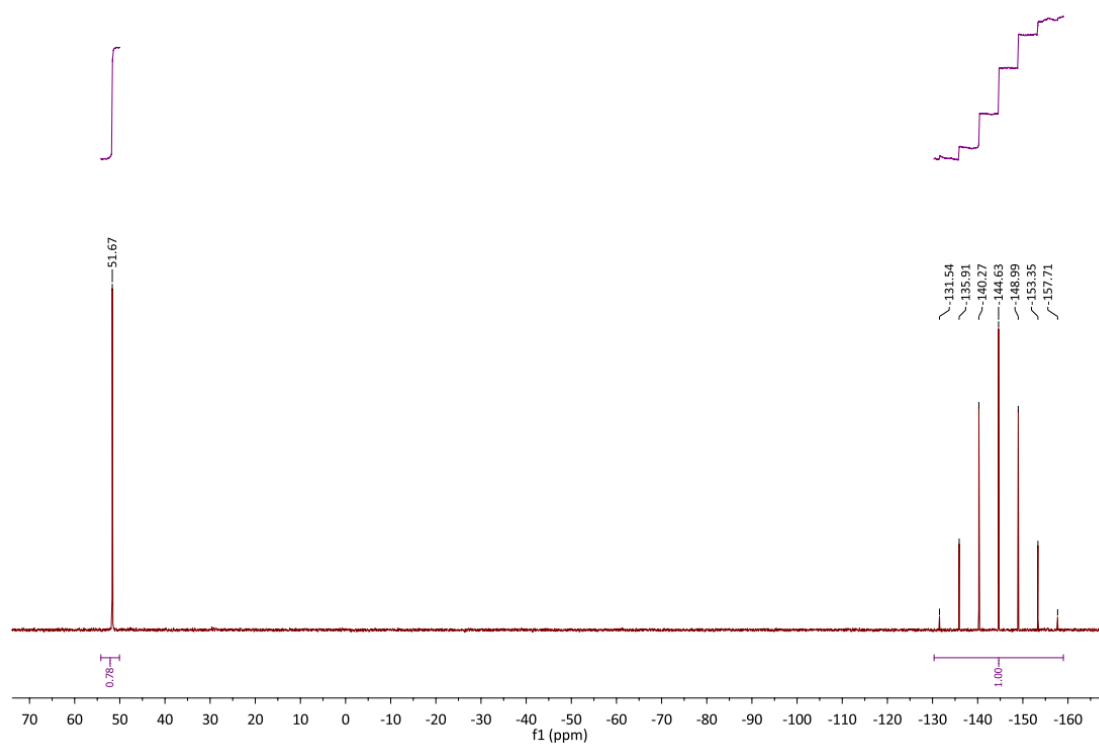

**Figure S50:**  $^{19}\text{F}\{^1\text{H}\}$  NMR spectrum of **6**.

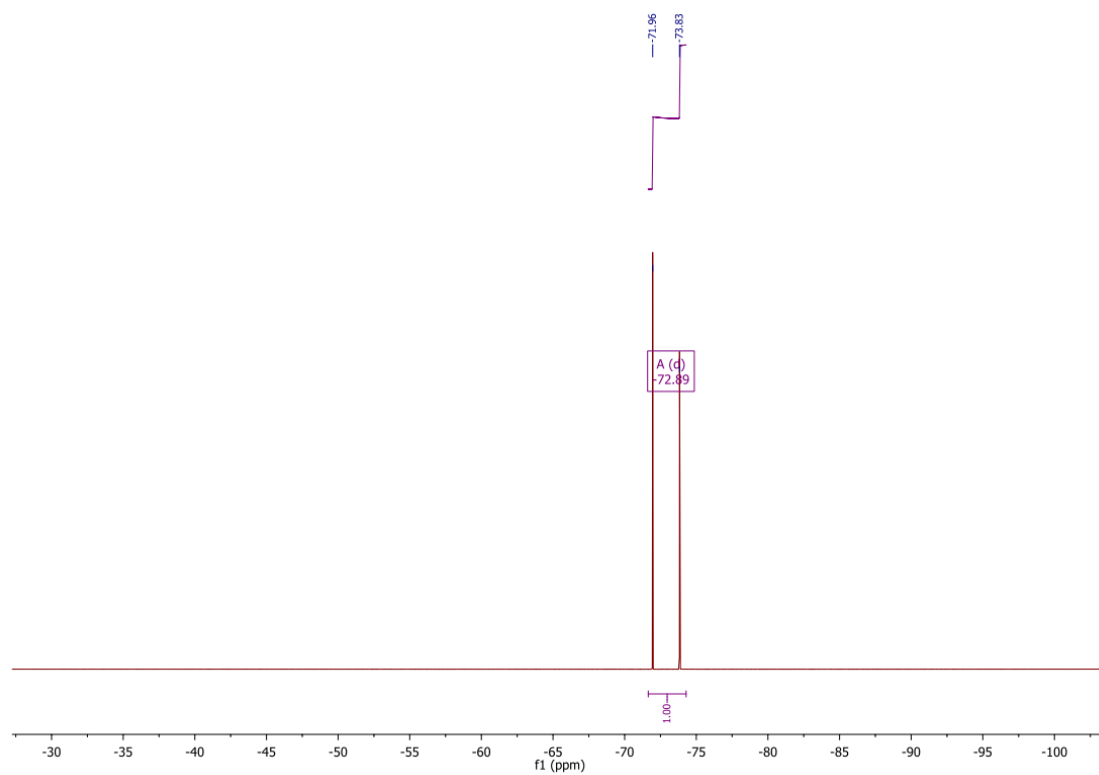

**Figure S51:** H,H-COSY NMR spectrum of **6**.

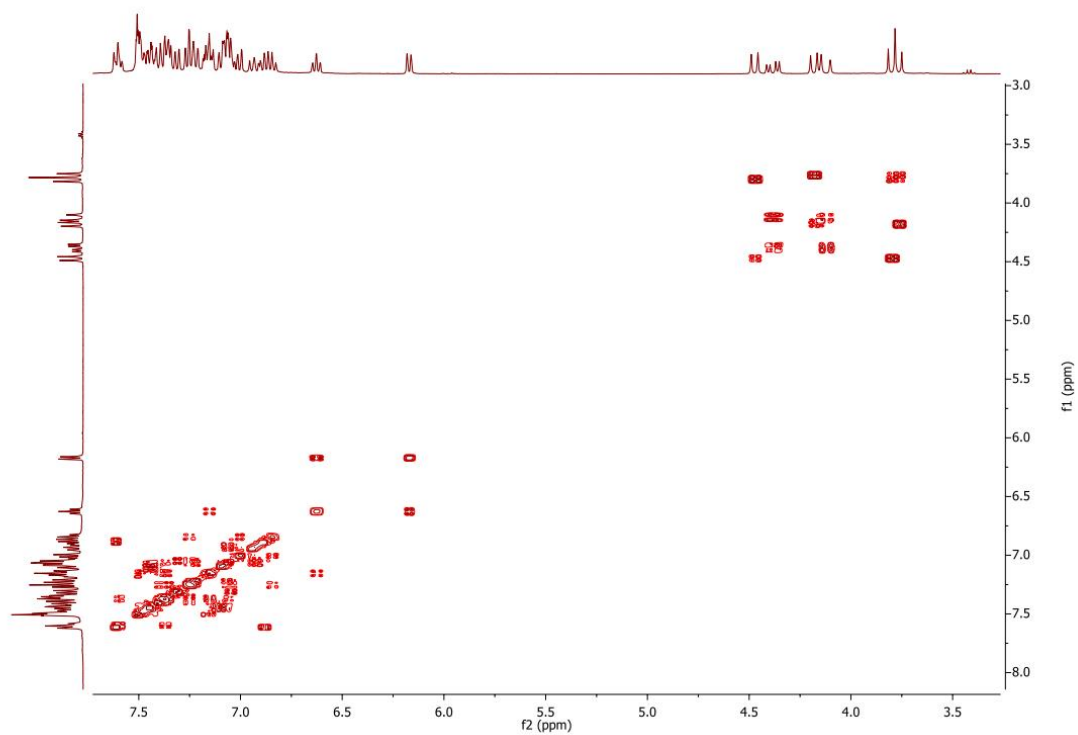

**Figure S52:** H,H-COSY NMR spectrum of **6** (expanded).

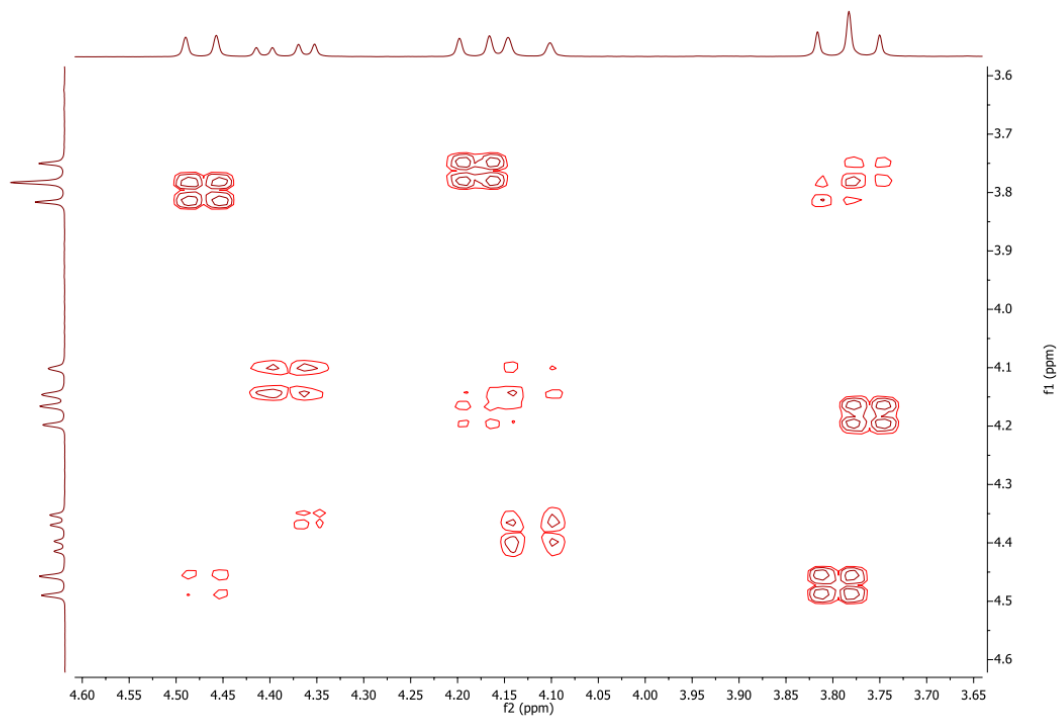

**Figure S53:** H,H-COSY NMR spectrum of **5** (expanded).

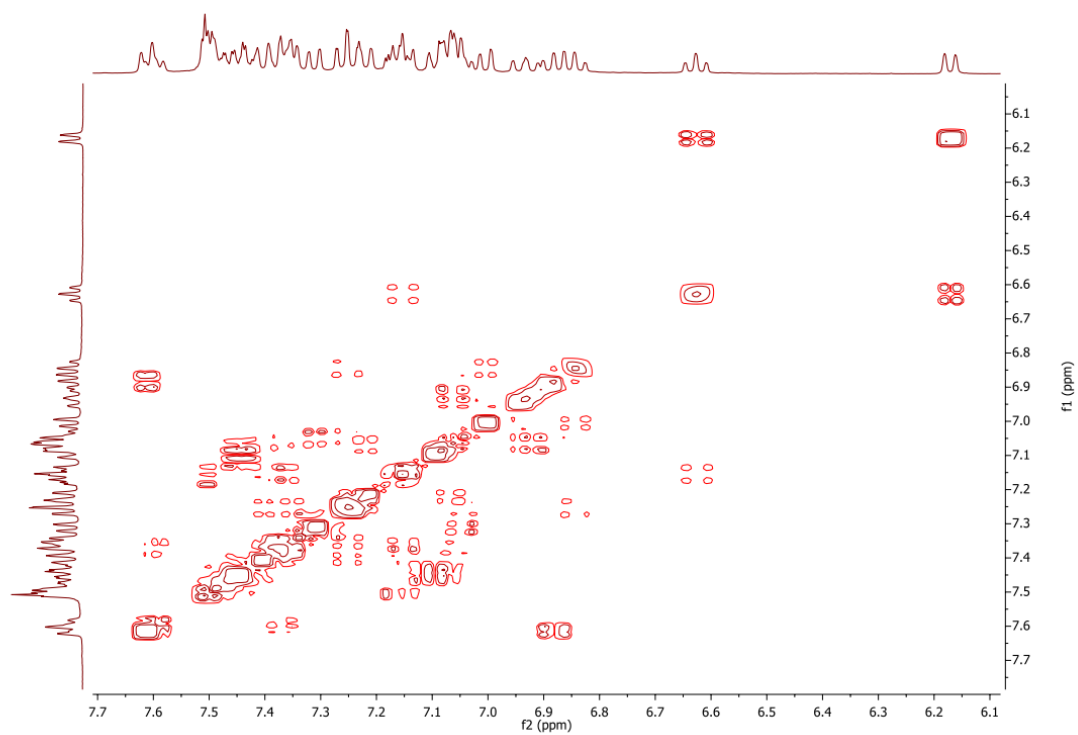

**Figure S54:** HMQC NMR spectrum of **6**.

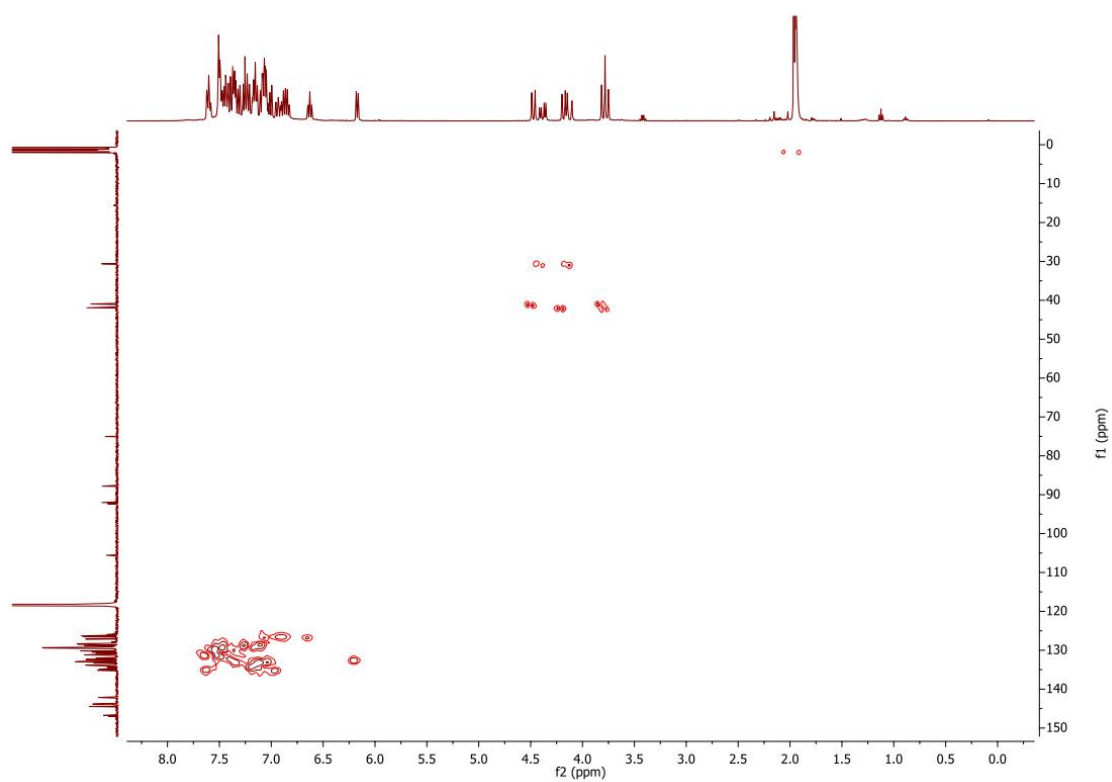

Figure S55: HMQC NMR spectrum of **6** (expanded).

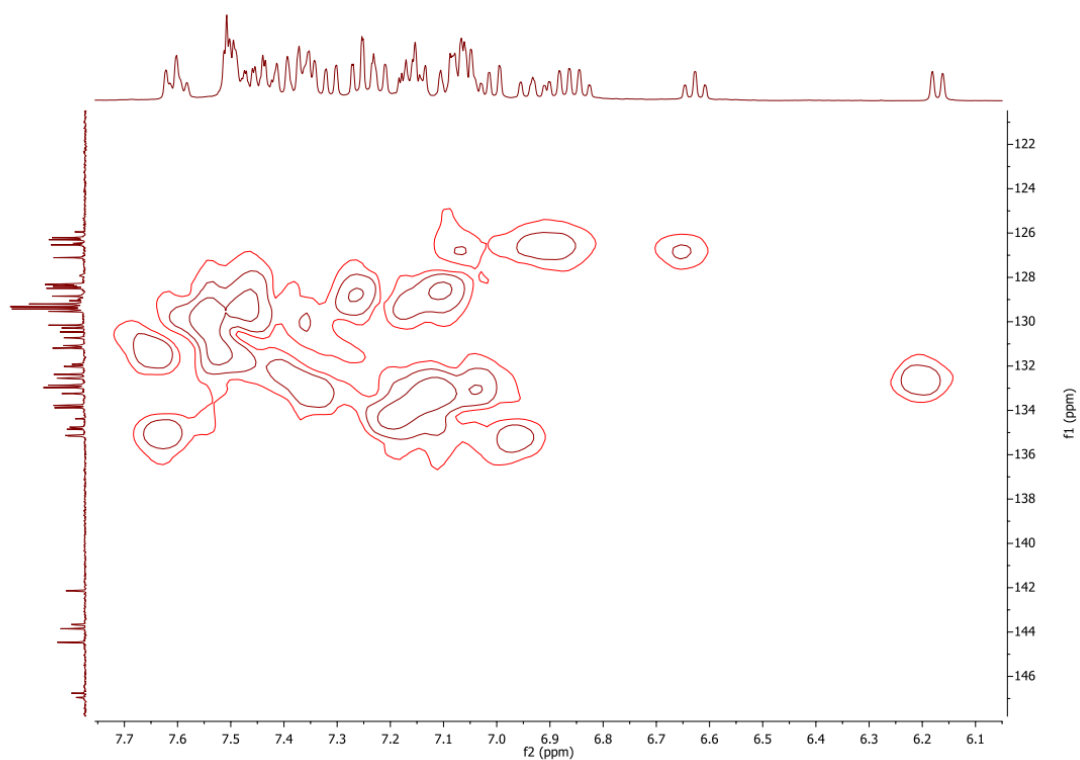

$[\text{Cp}^{\text{C}}(\text{BzPPh}_2(\text{AuCl})_2)]$  (**7**):

Figure S56:  $^1\text{H}$  NMR spectrum of **7**.

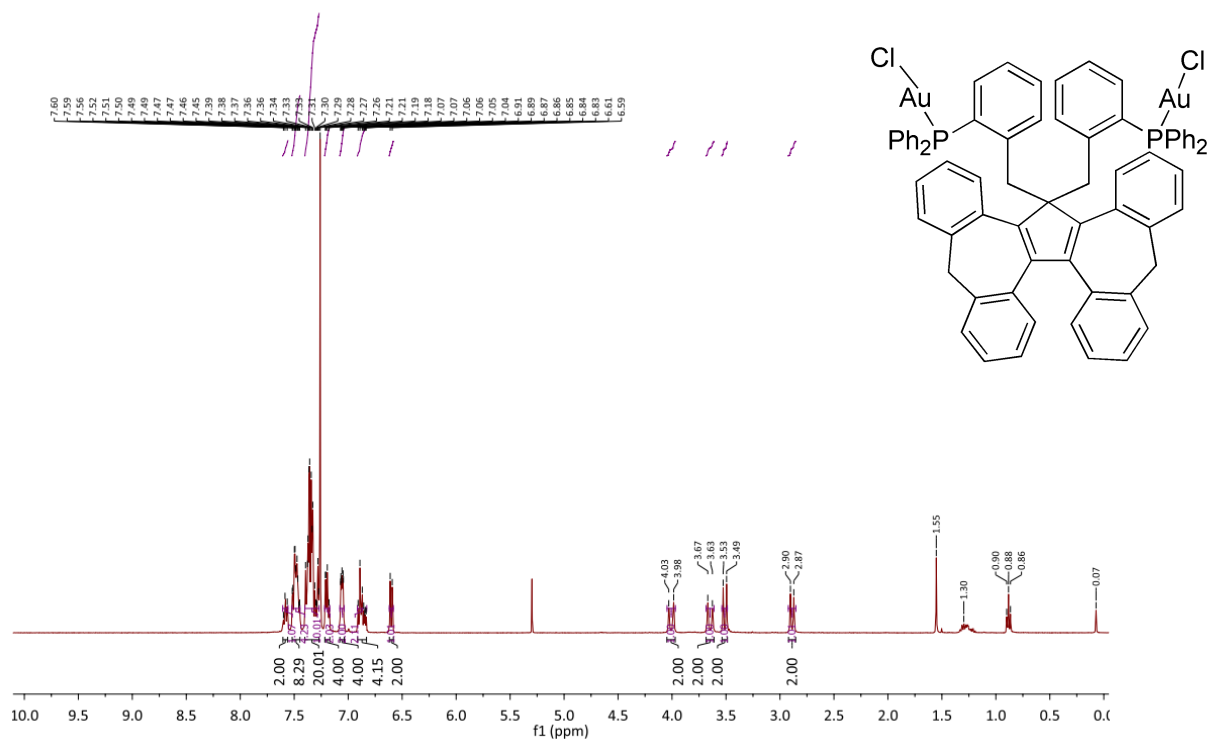

Figure S57:  $^1\text{H}$  NMR spectrum of **7** (expanded).

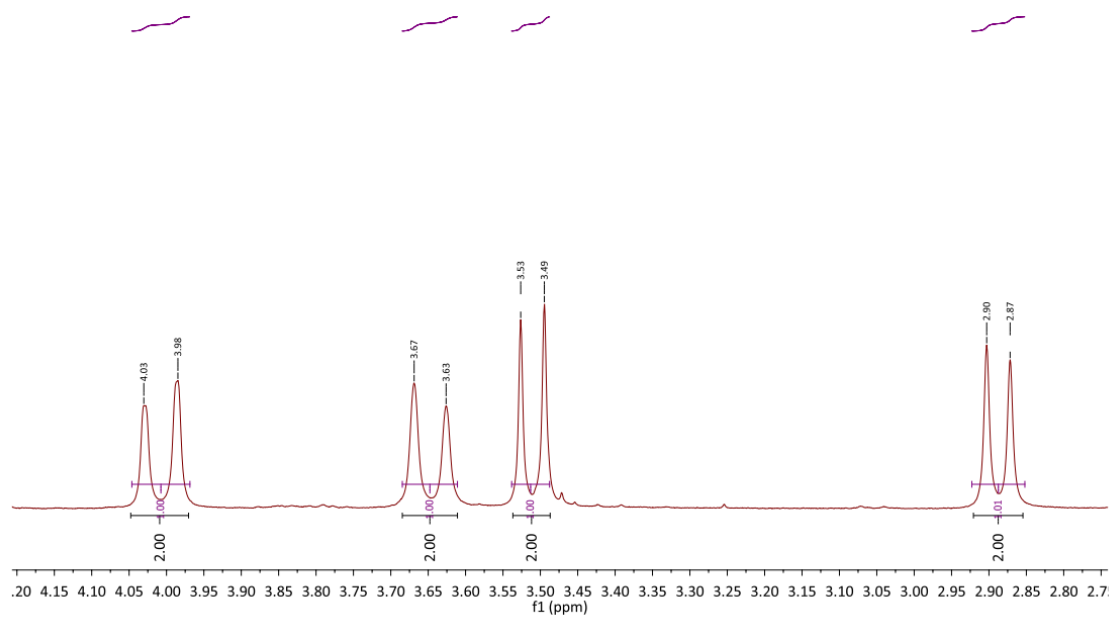

Figure S58:  $^1\text{H}$  NMR spectrum of **7** (expanded).

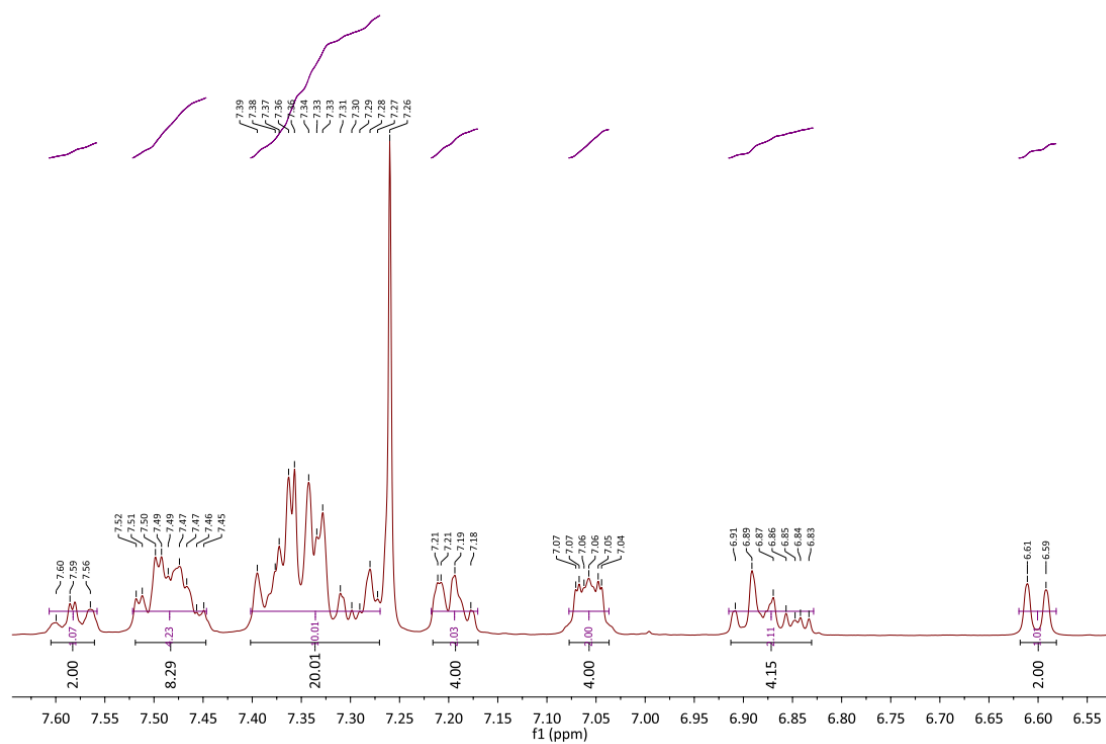

Figure S59:  $^{31}\text{P}\{^1\text{H}\}$  NMR spectrum of **7**.

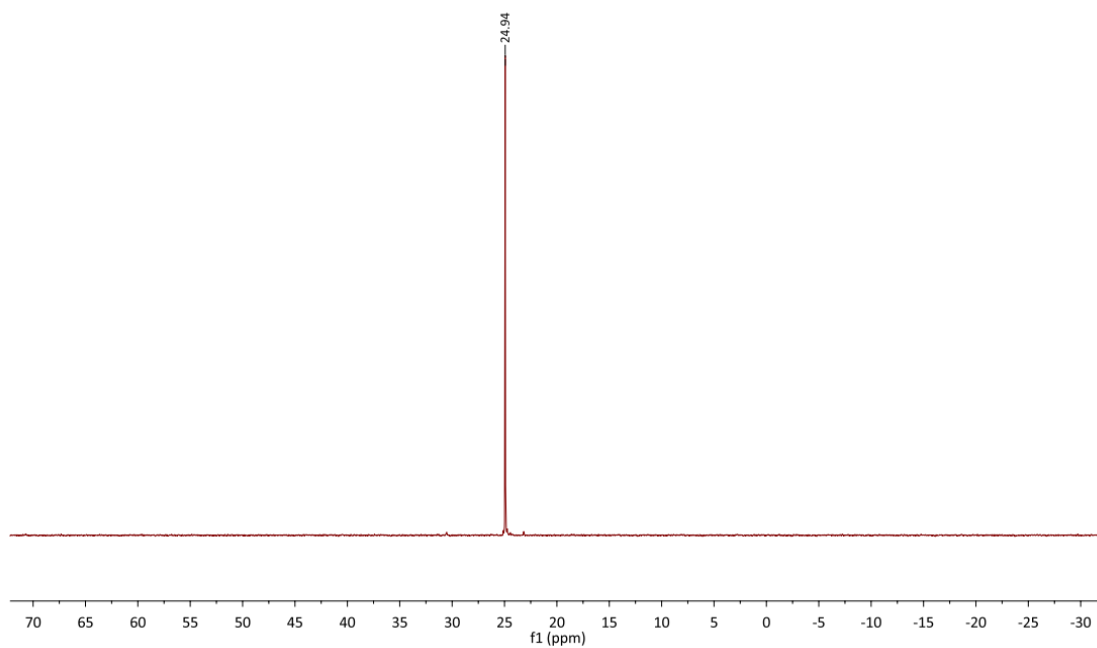

$[\text{Cp}^{\text{C}}(\text{BzPPh}_2)_2(\text{PdCl}(\mu^2\text{-Cl}))_2]$  (**8**):

Figure S60:  $^1\text{H}$  NMR spectrum of **8**.

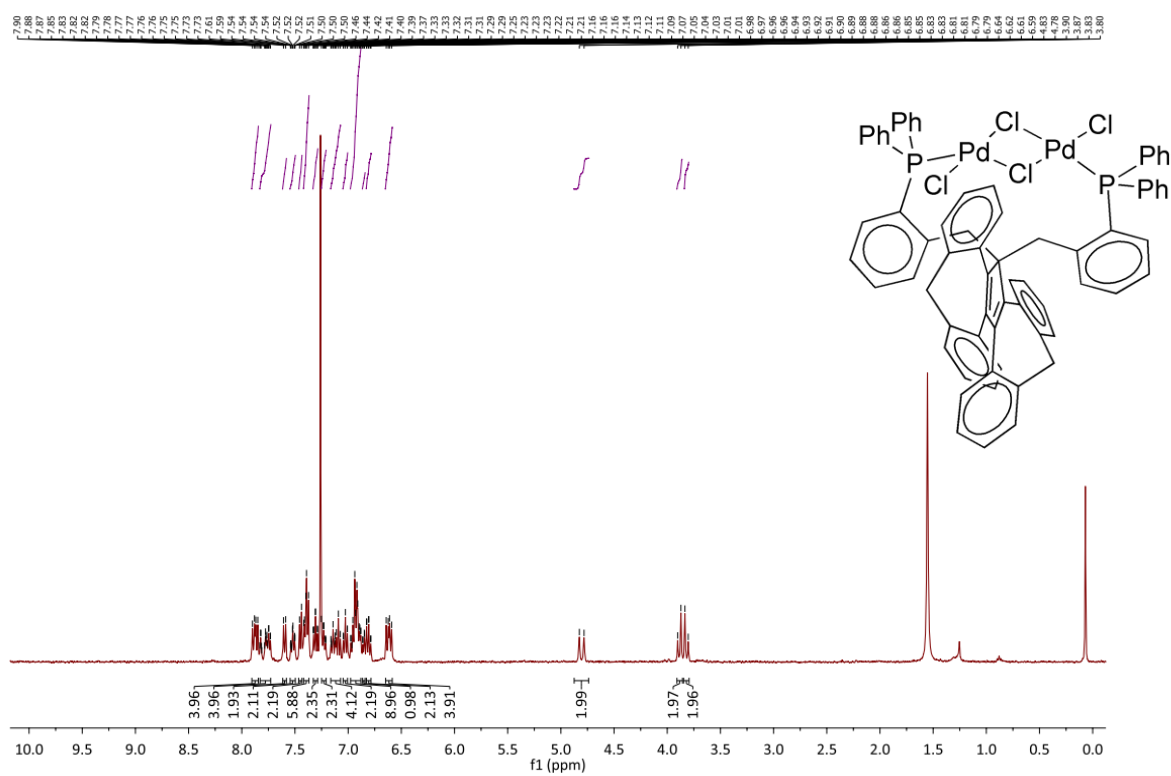

**Figure S61:**  $^1\text{H}$  NMR spectrum of **8** (expanded).

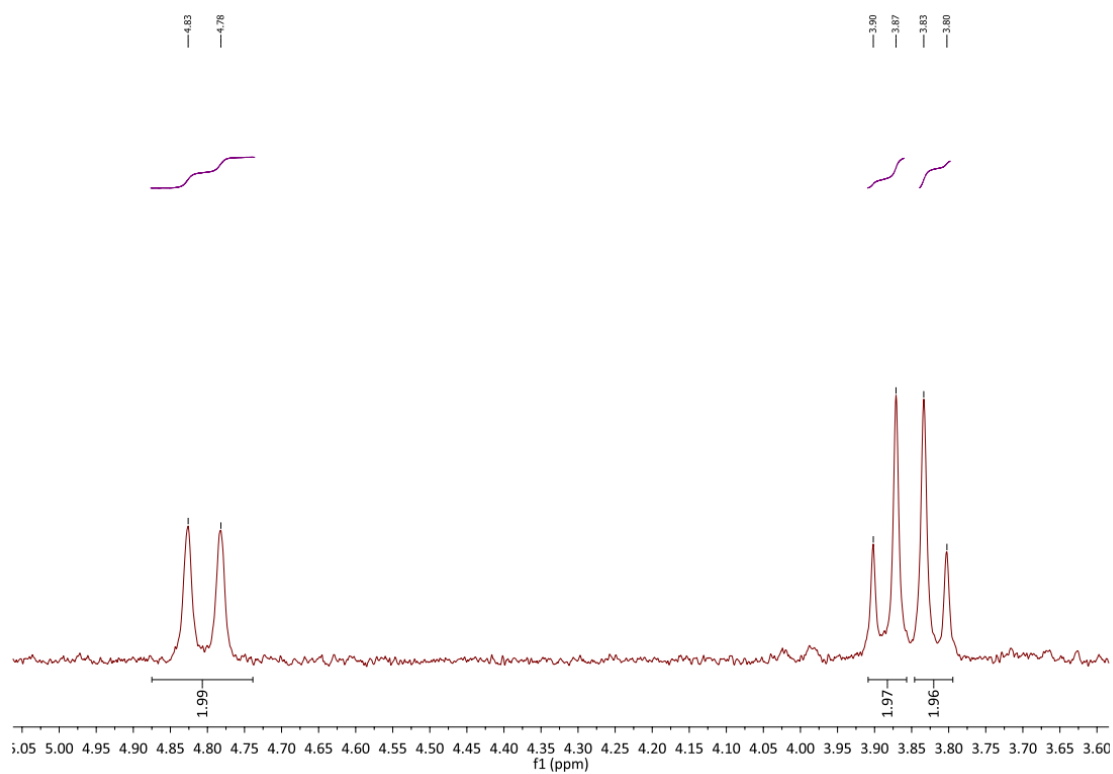

**Figure S62:**  $^1\text{H}$  NMR spectrum of **8** (expanded).

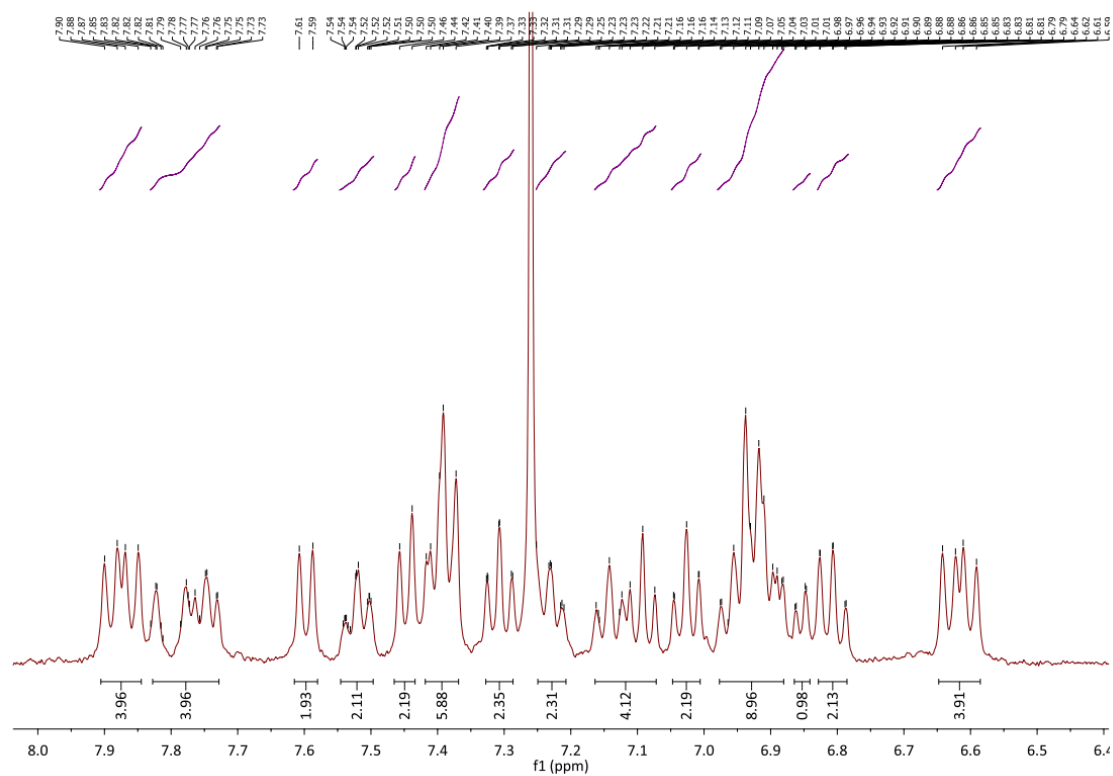



**Figure S63:**  $^{13}\text{C}\{^1\text{H}\}$  NMR spectrum of **8**.

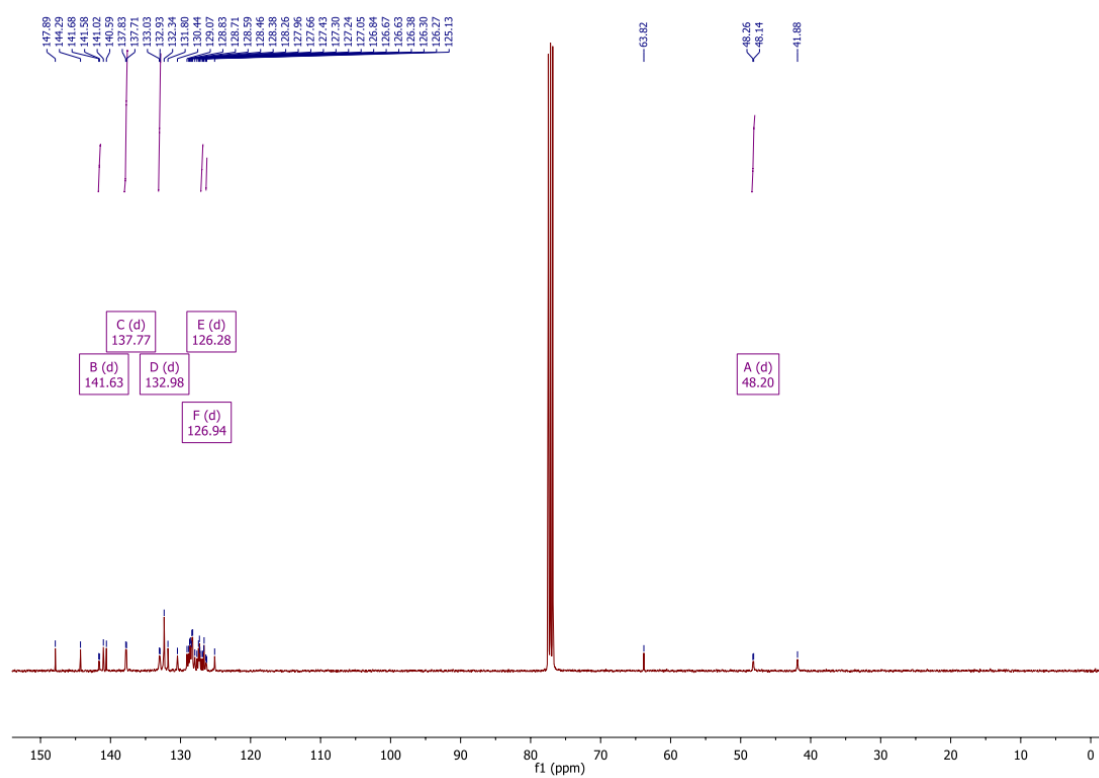

**Figure S64:**  $^{13}\text{C}\{^1\text{H}\}$  NMR spectrum of **8** (expanded).

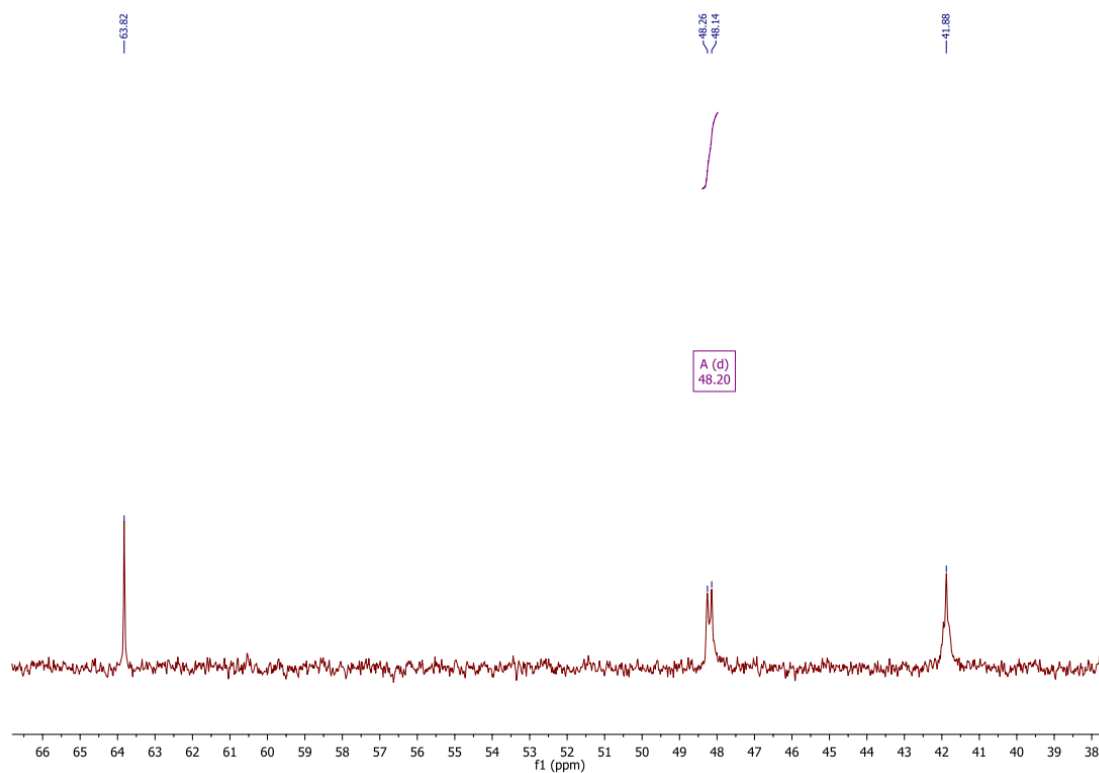

**Figure S65:**  $^{13}\text{C}\{^1\text{H}\}$  NMR spectrum of **8** (expanded).

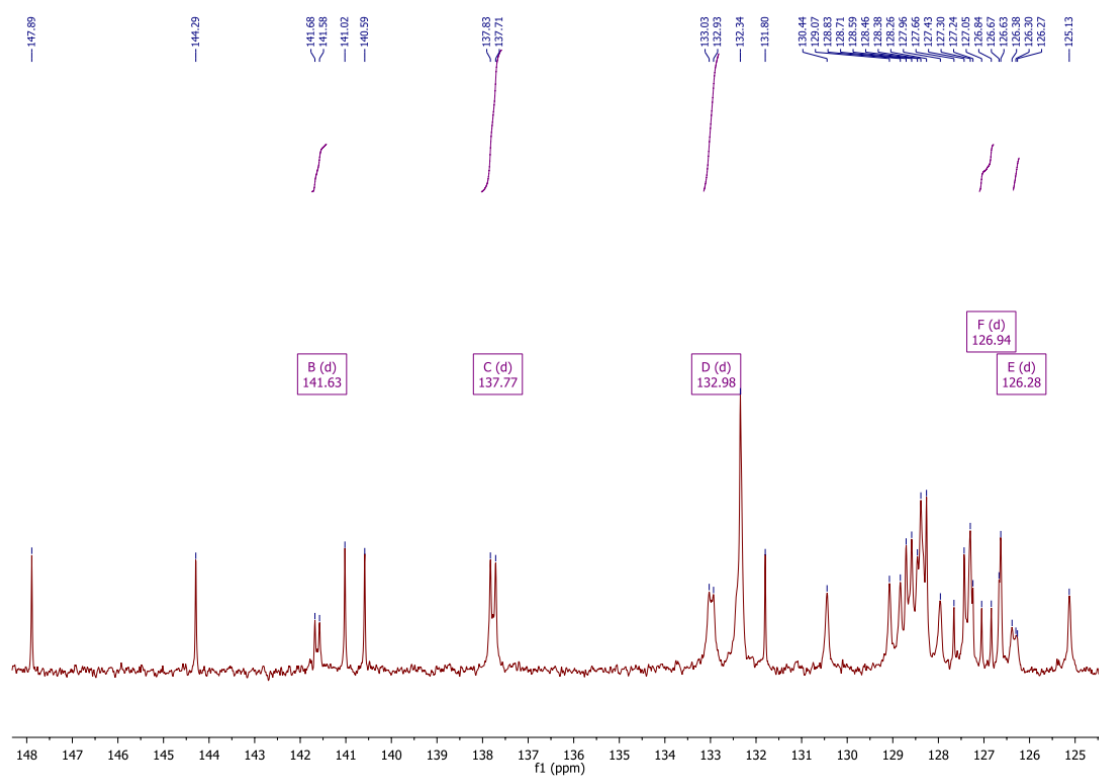

**Figure S66:**  $^{31}\text{P}\{^1\text{H}\}$  NMR spectrum of **8**.

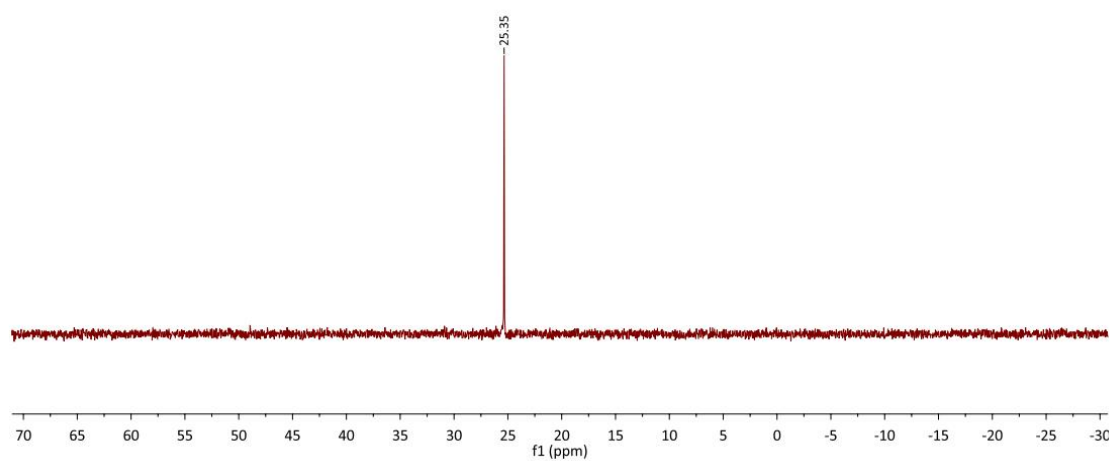

**Figure S67:** H,H-COSY NMR spectrum of **8**.

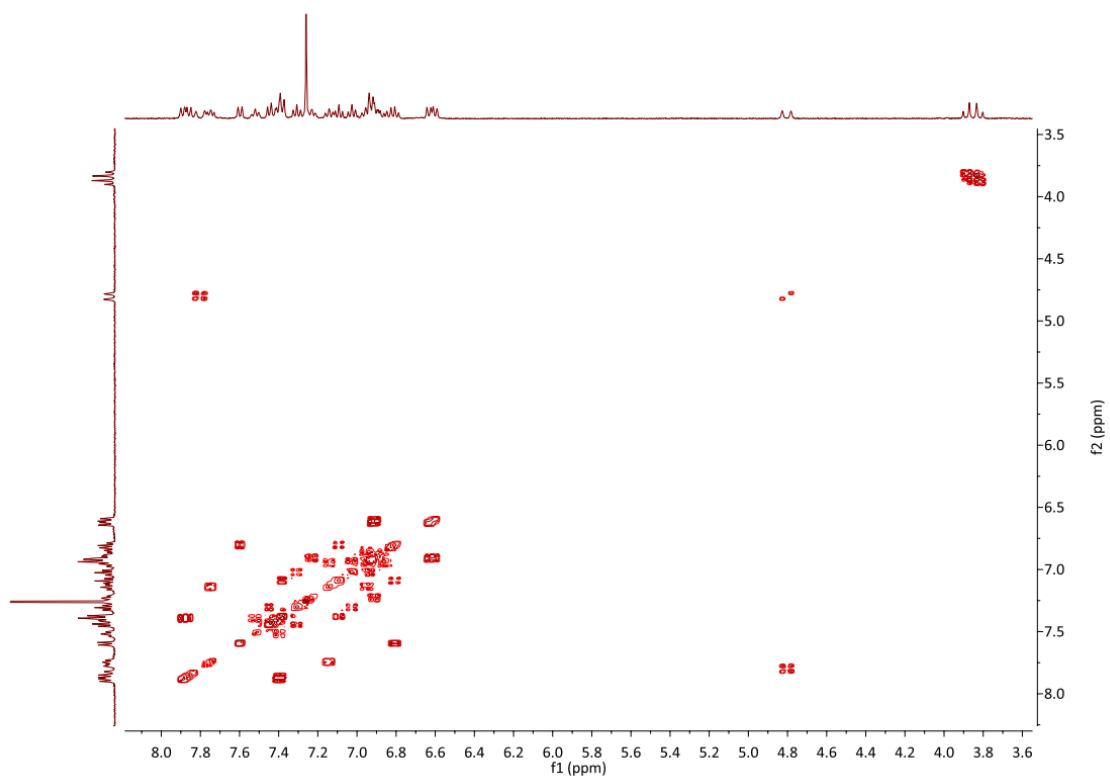

**Figure S68:** H,H-COSY NMR spectrum of **8** (expanded).

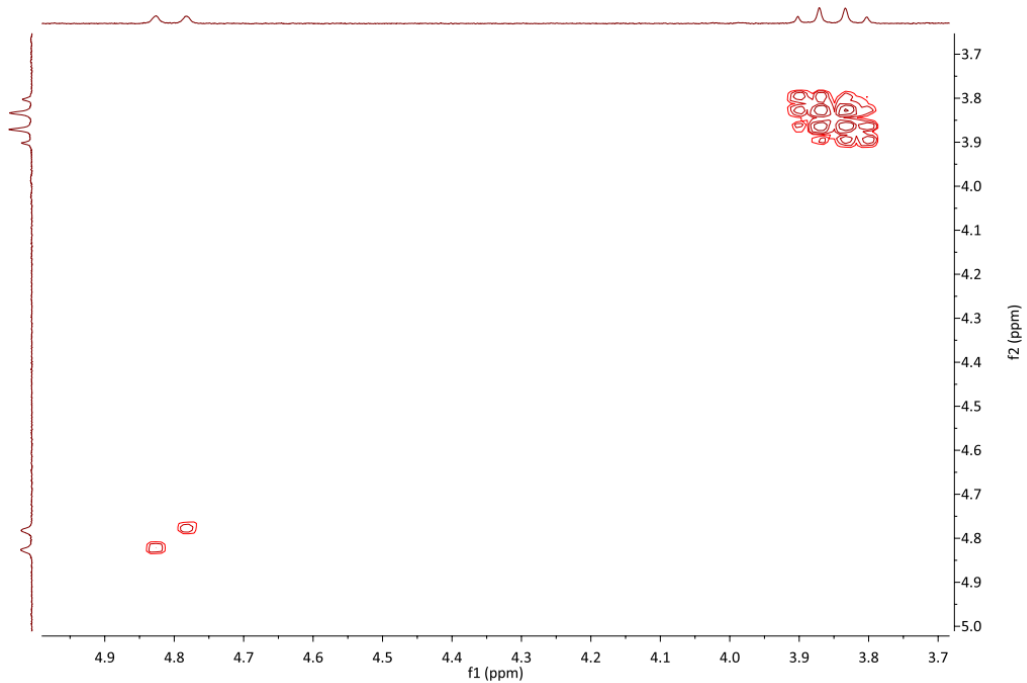

**Figure S69:** H,H-COSY NMR spectrum of **8** (expanded).

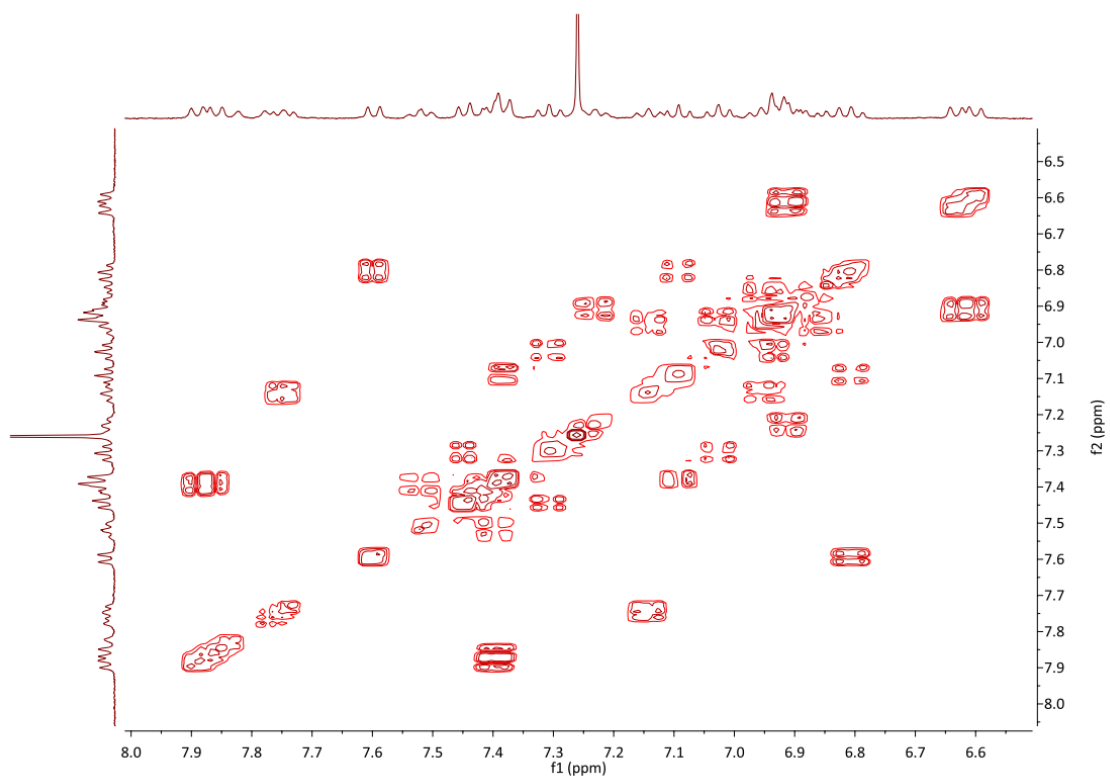

**Figure S70:** HMQC NMR spectrum of **8**.

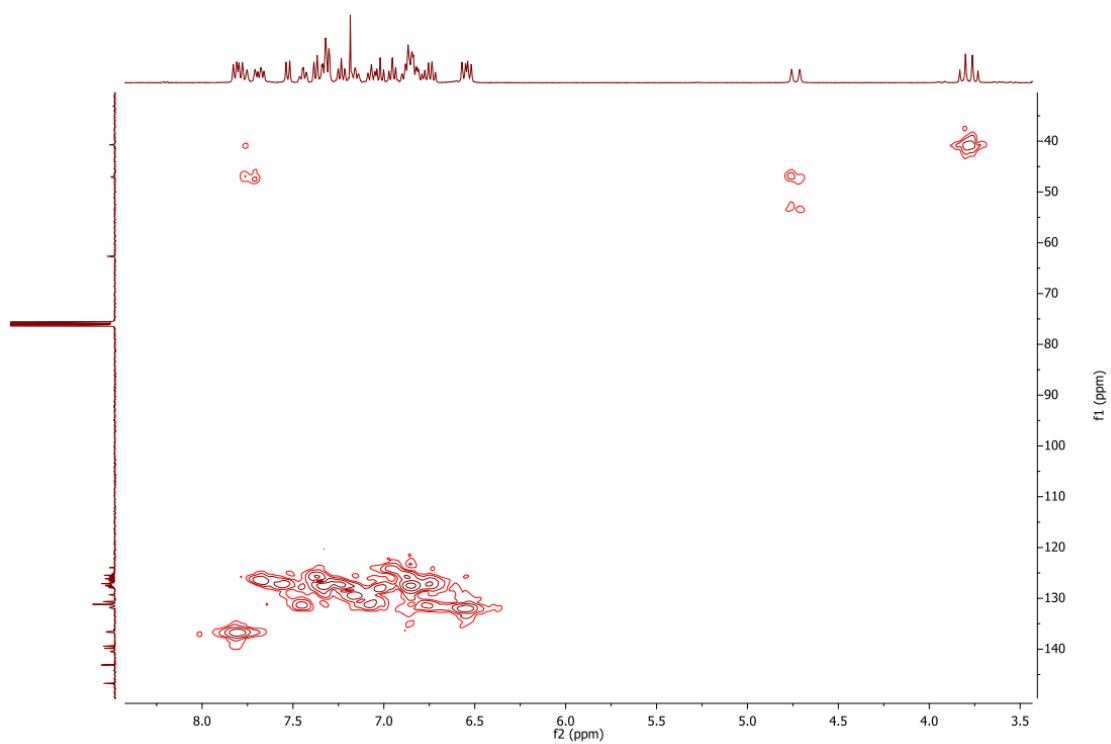

**Figure S71:** HMQC NMR spectrum of **8** (expanded).

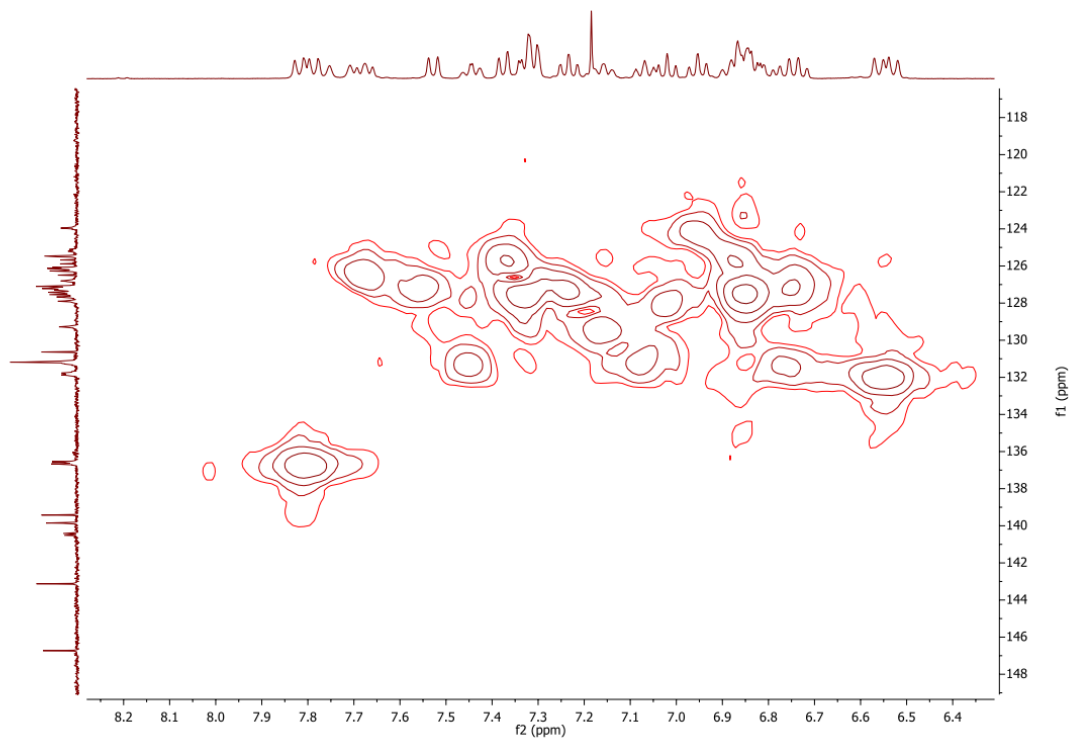

**[Cp<sup>c</sup>(BzPPh<sub>2</sub>)<sub>2</sub>](Rh(μ<sup>2</sup>-Cl(CO))<sub>2</sub>) (9):**

**Figure S72:**  $^1\text{H}$  NMR spectrum of **9**.

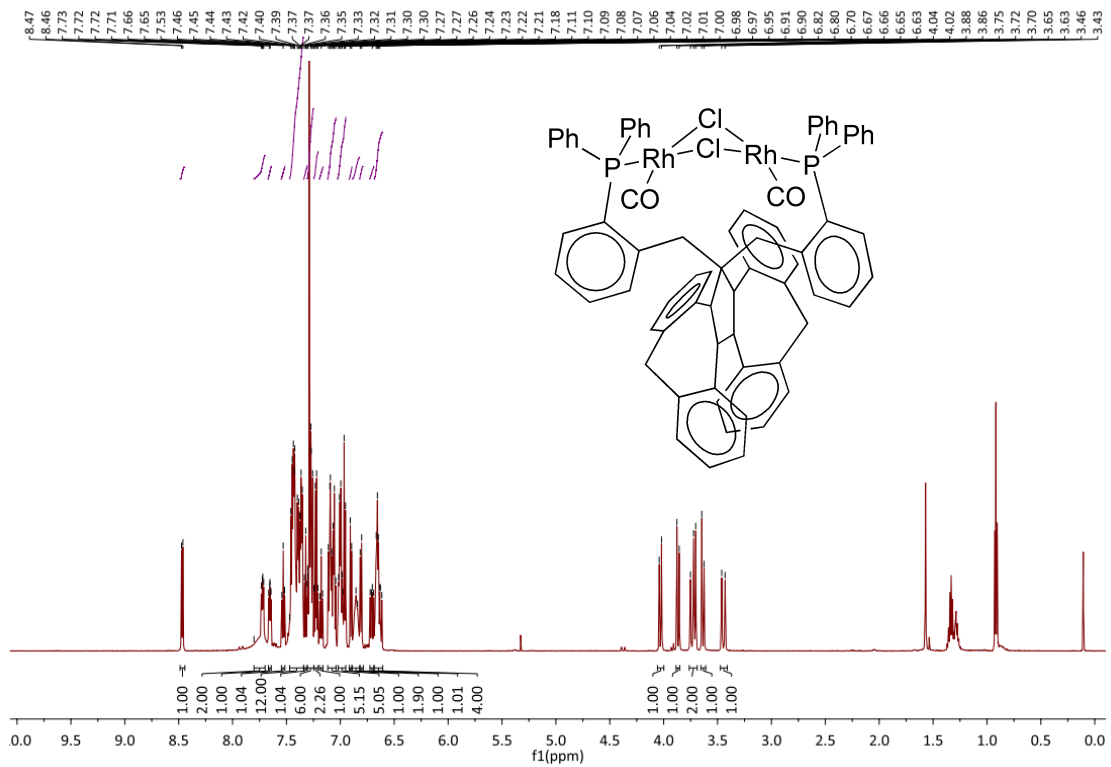

**Figure S73:**  $^1\text{H}$  NMR spectrum of **9** (expanded).

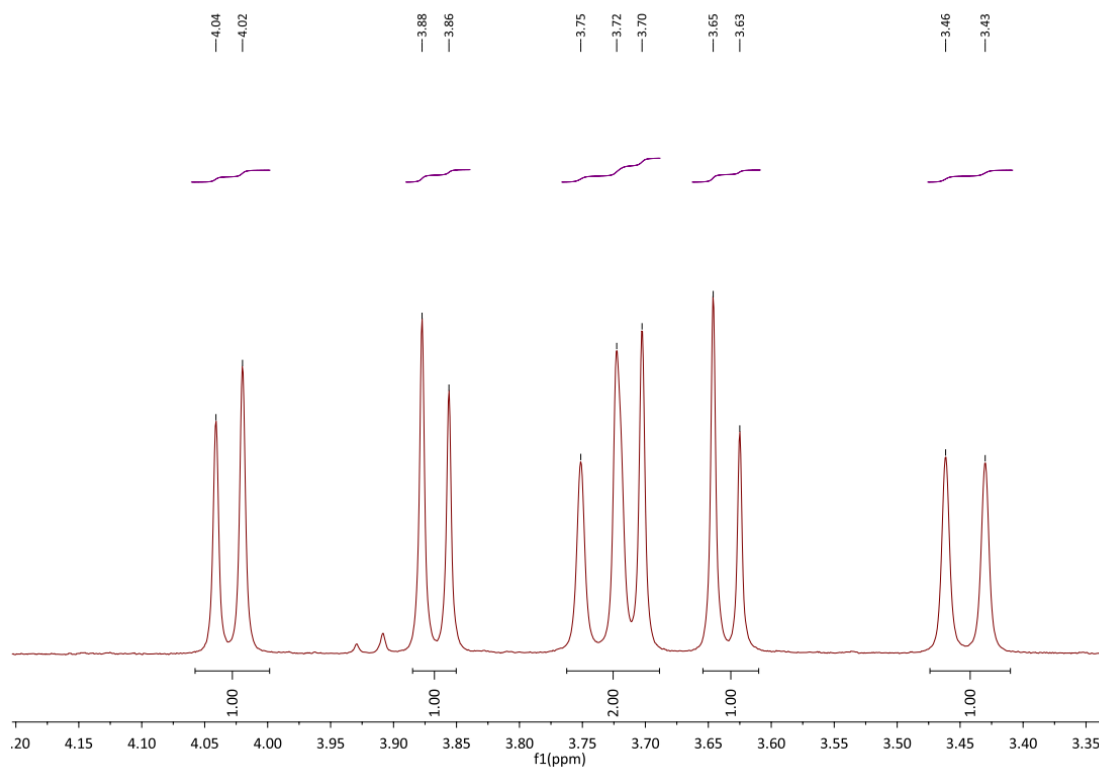

**Figure S74:**  $^1\text{H}$  NMR spectrum of **9** (expanded).

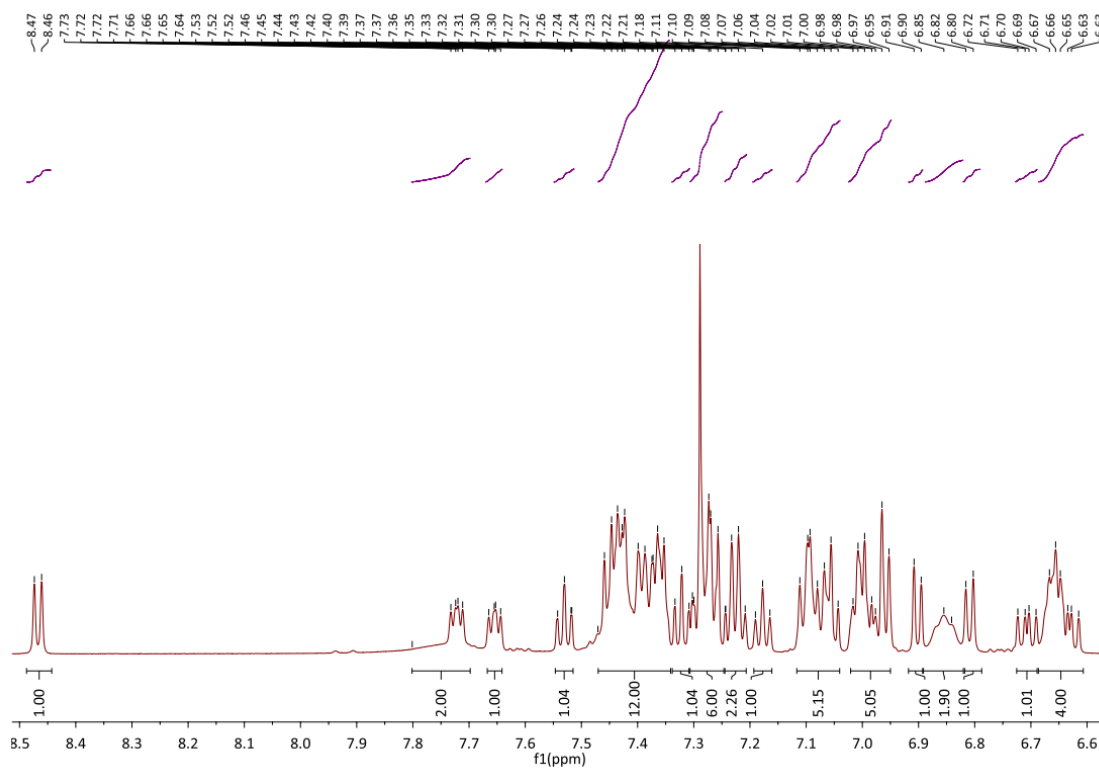

Figure S75:  $^{13}\text{C}\{^1\text{H}\}$  NMR spectrum of **9**.

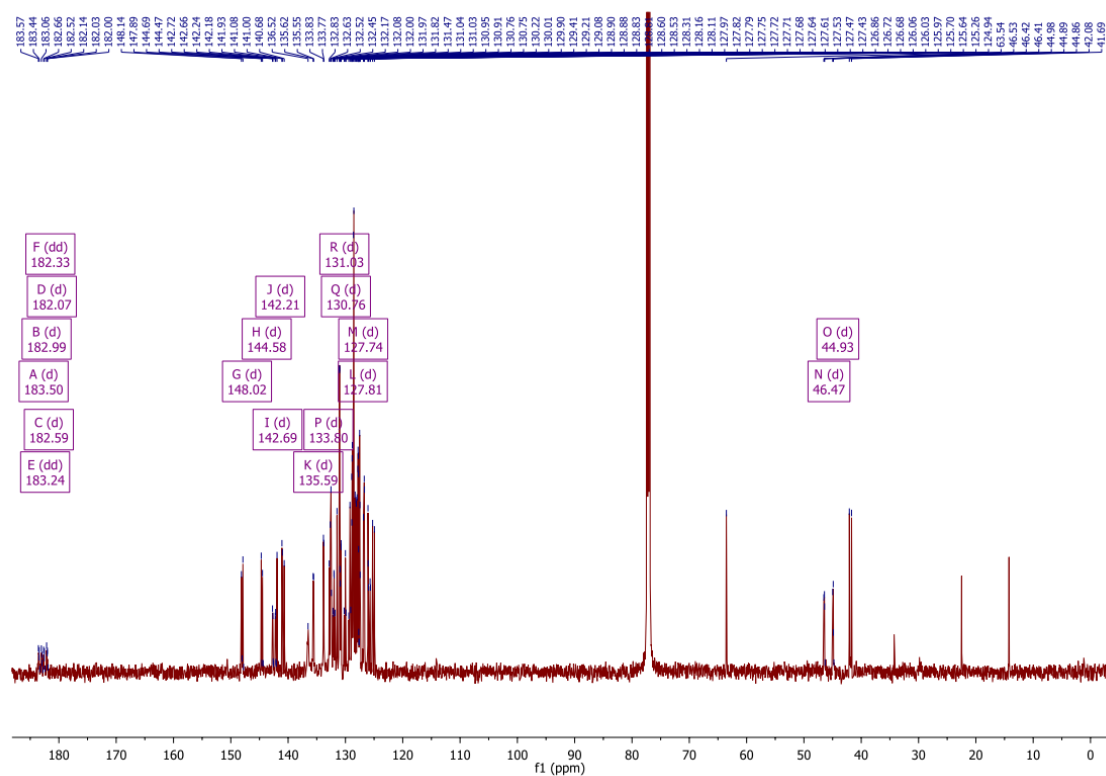

Figure S76:  $^{13}\text{C}\{^1\text{H}\}$  NMR spectrum of **9** (expanded).

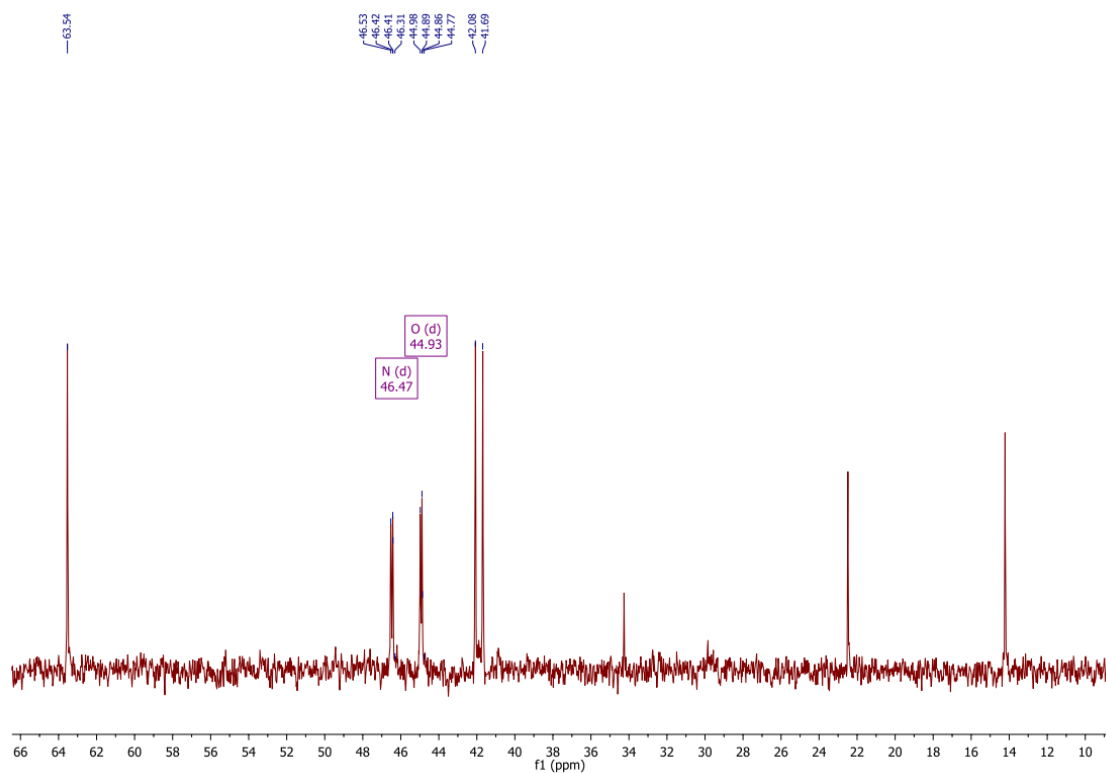

**Figure S77:**  $^{13}\text{C}\{^1\text{H}\}$  NMR spectrum of **9** (expanded).

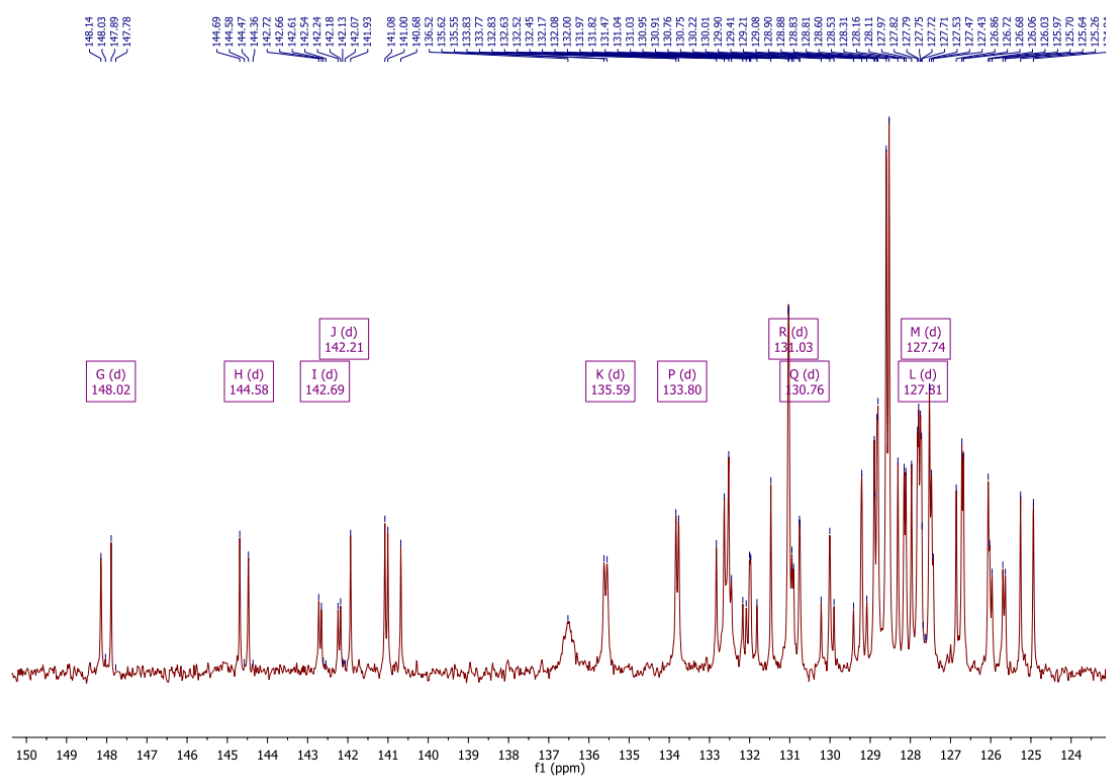

**Figure S78:**  $^{13}\text{C}\{^1\text{H}\}$  NMR spectrum of **9** (expanded).

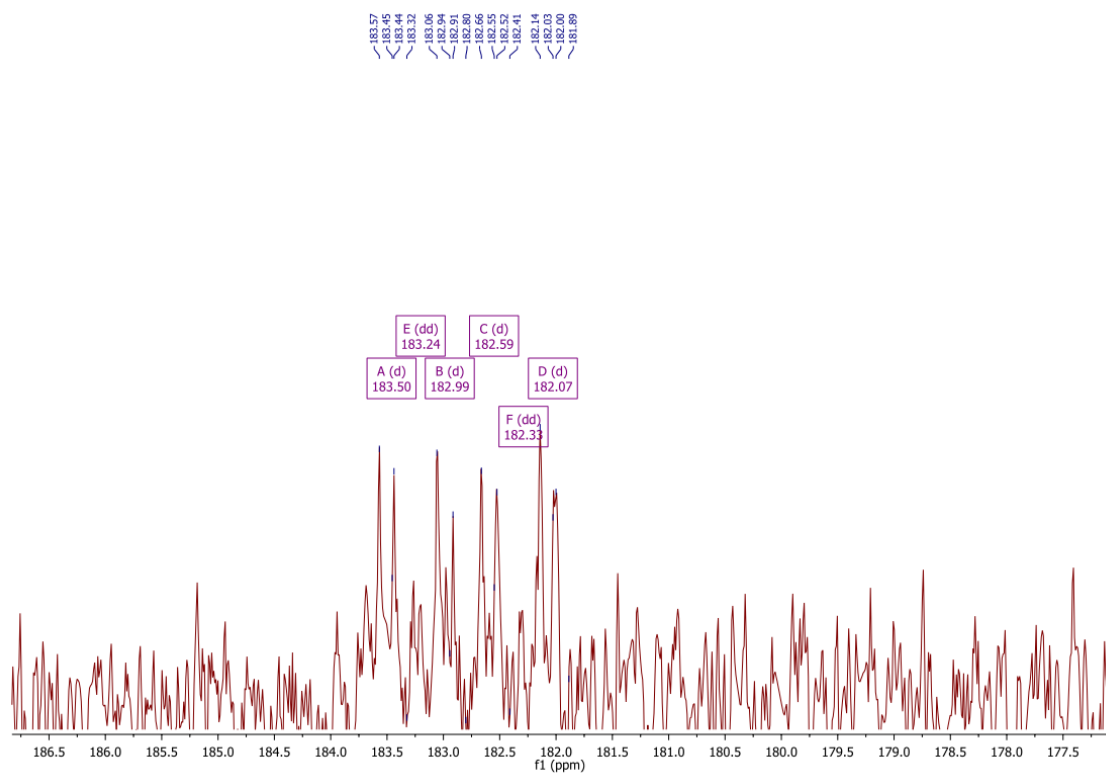



**Figure S79:**  $^{31}\text{P}\{^1\text{H}\}$  NMR spectrum of **9**.

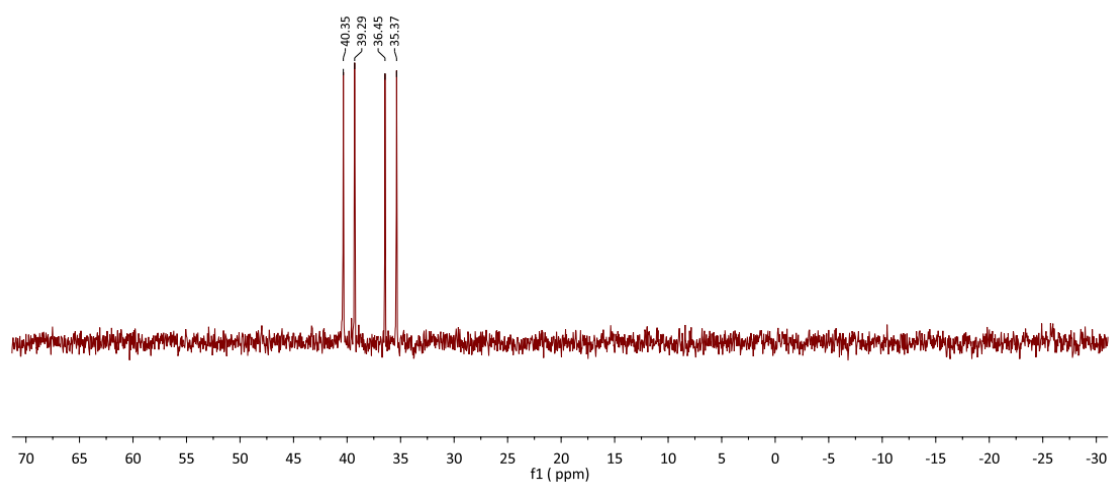

**Figure S80:** H,H-COSY NMR spectrum of **9**.

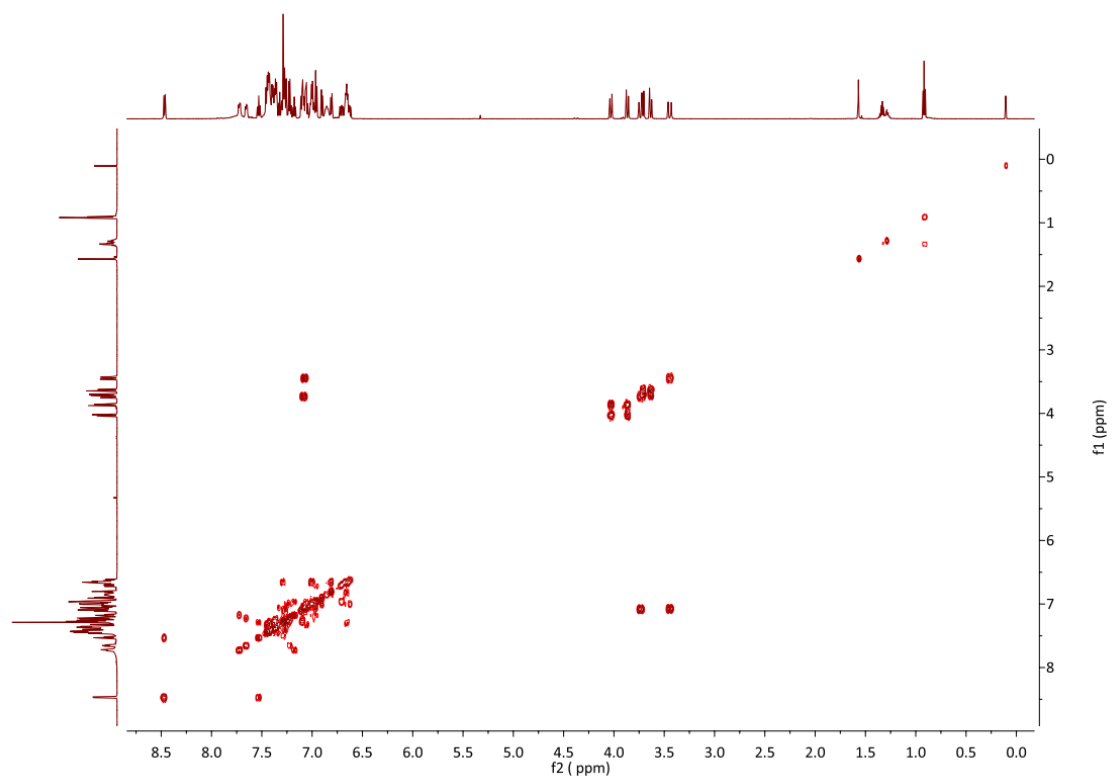

**Figure S81:** H,H-COSY NMR spectrum of **9** (expanded).

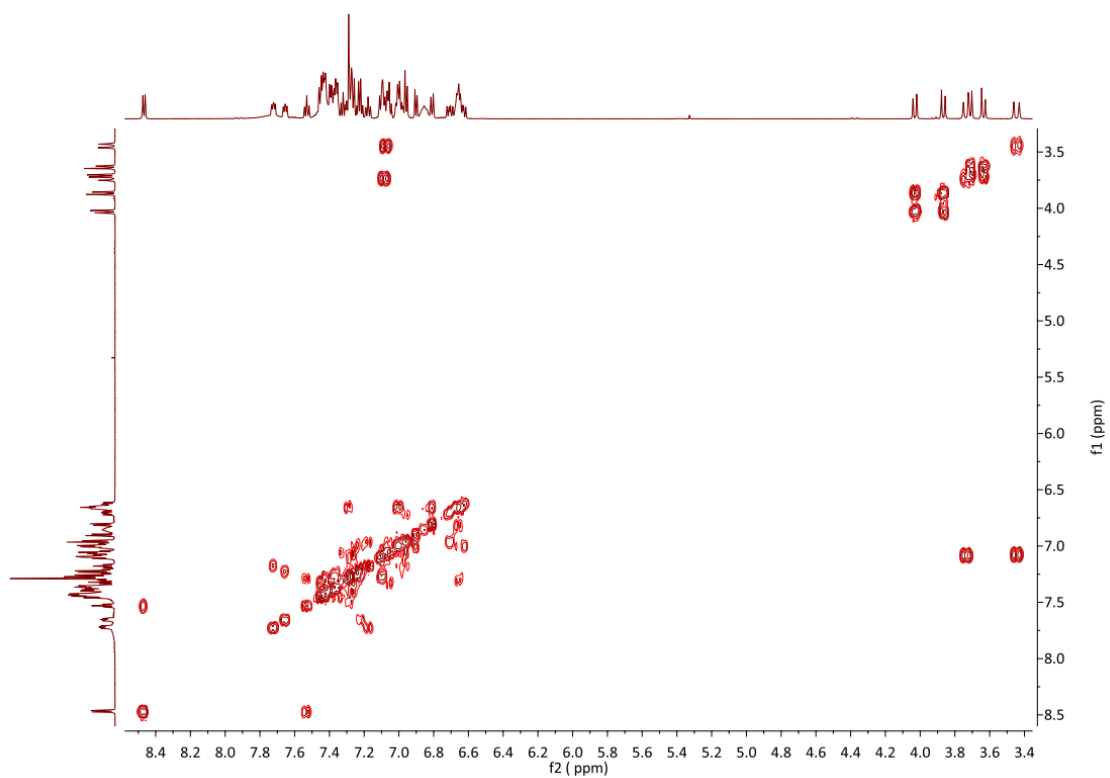

**Figure S82:** H,H-COSY NMR spectrum of **9** (expanded).

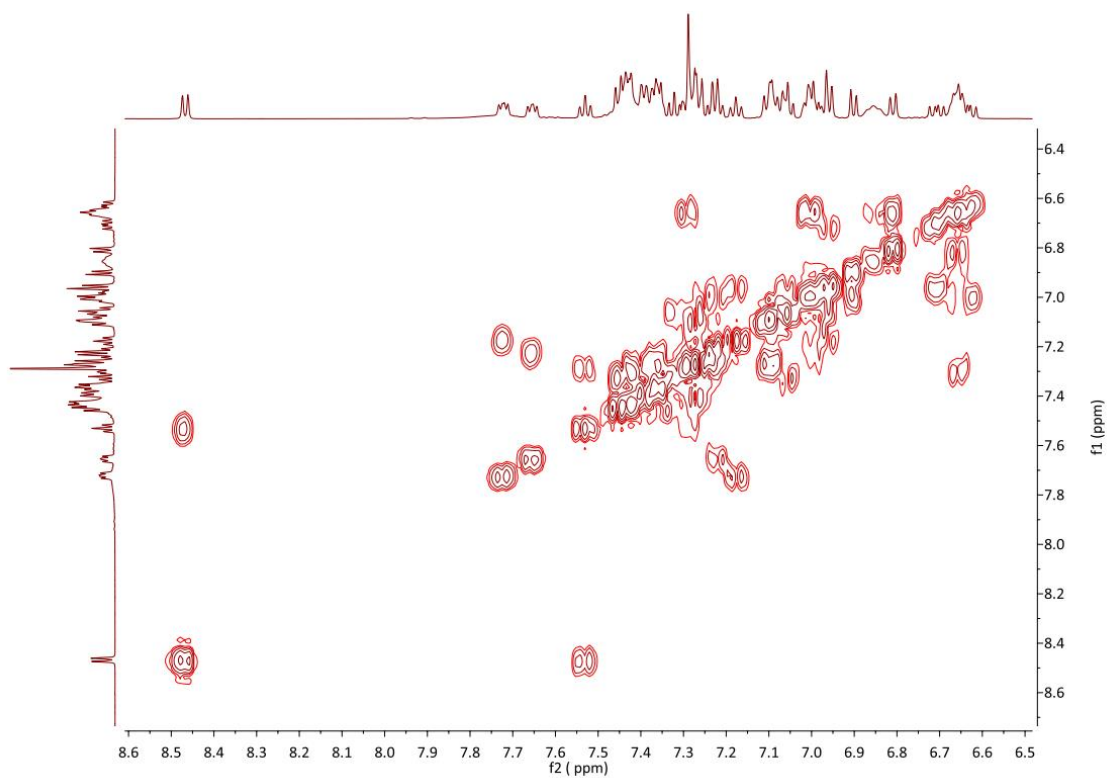

**Figure S83:** HMQC NMR spectrum of **9**.

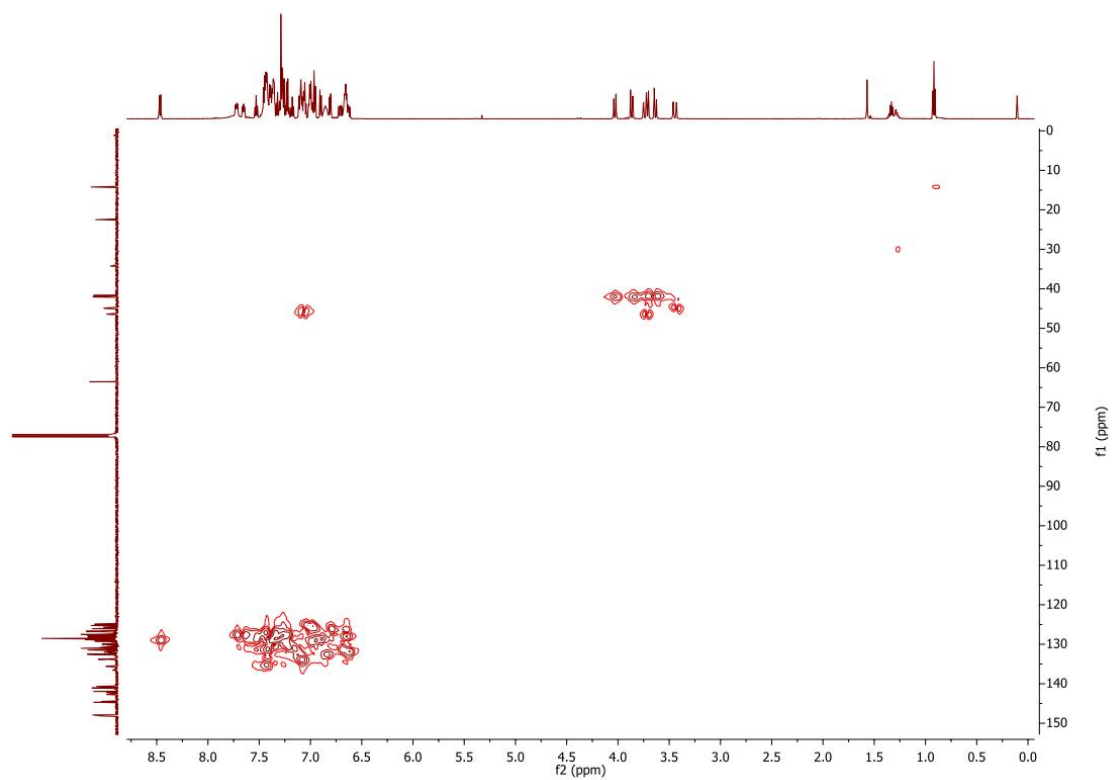

**Figure S84:** HMQC NMR spectrum of **9** (expanded).

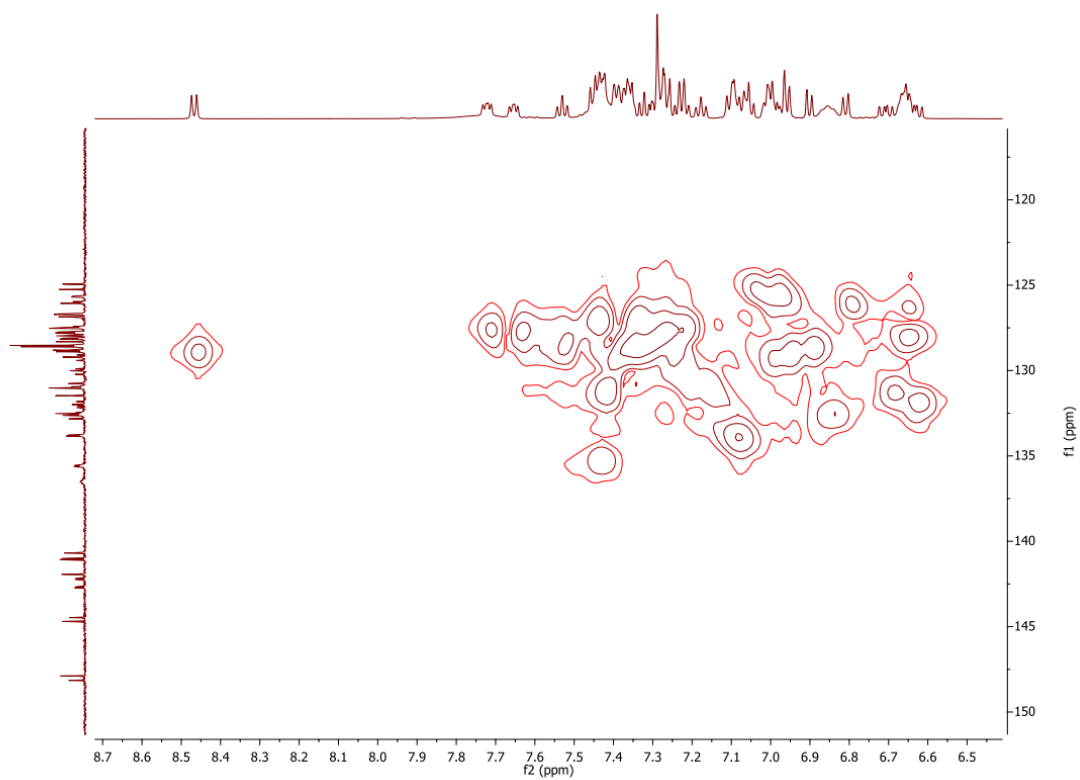

**[Cp<sup>C</sup>(BzPPh<sub>2</sub>)<sub>2</sub>(RhCl(CO))] **(10):****

**Figure S85:** <sup>1</sup>H NMR spectrum of **10**.

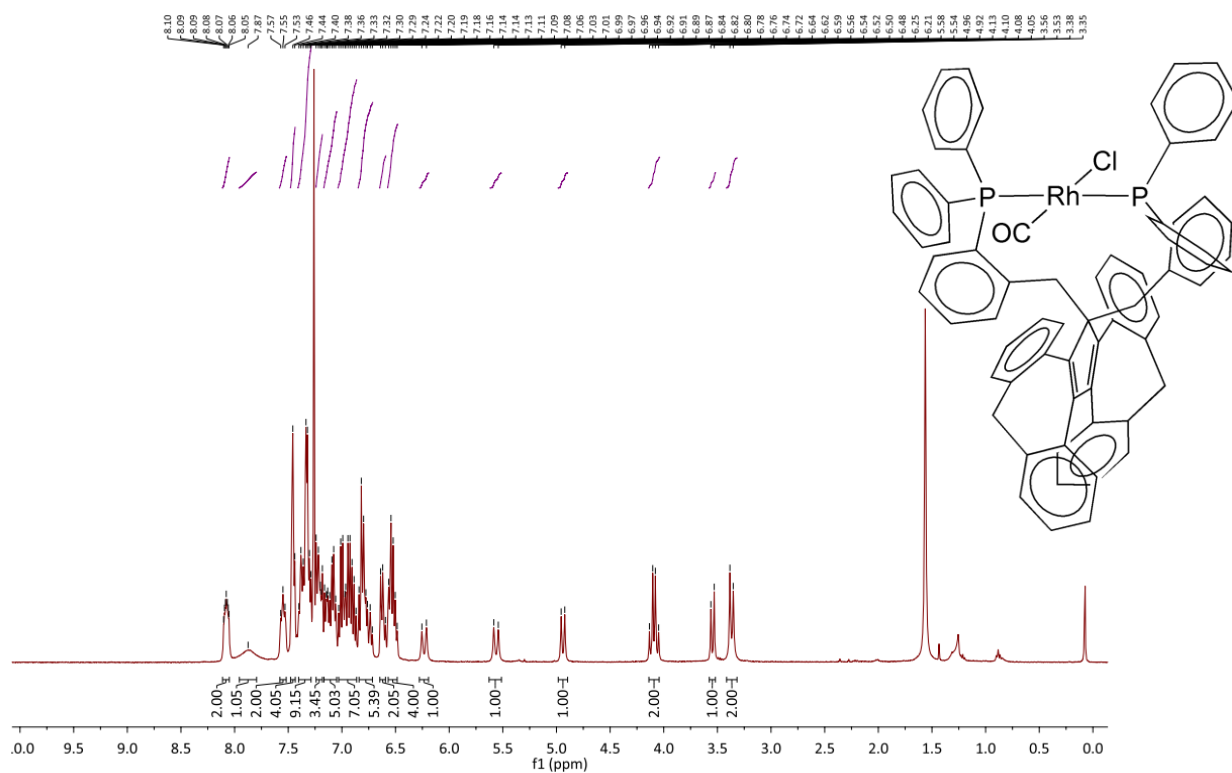

**Figure S86:** <sup>1</sup>H NMR spectrum of **10** (expanded).

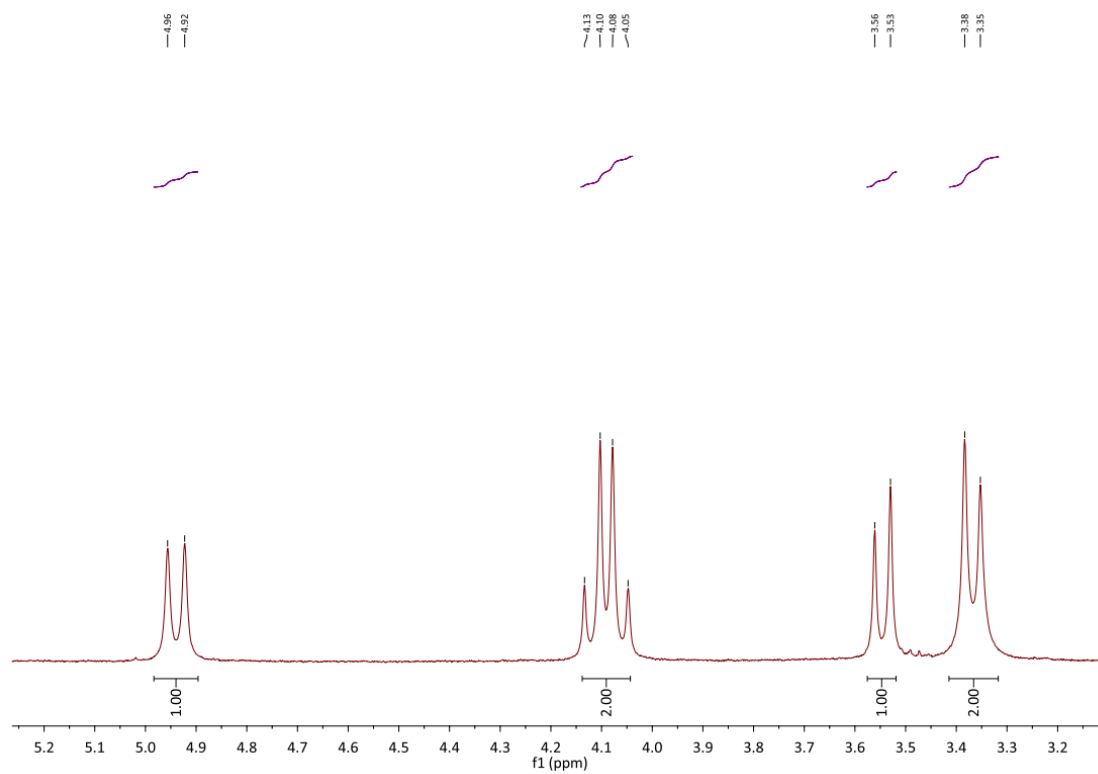

Figure S87:  $^1\text{H}$  NMR spectrum of **10** (expanded).

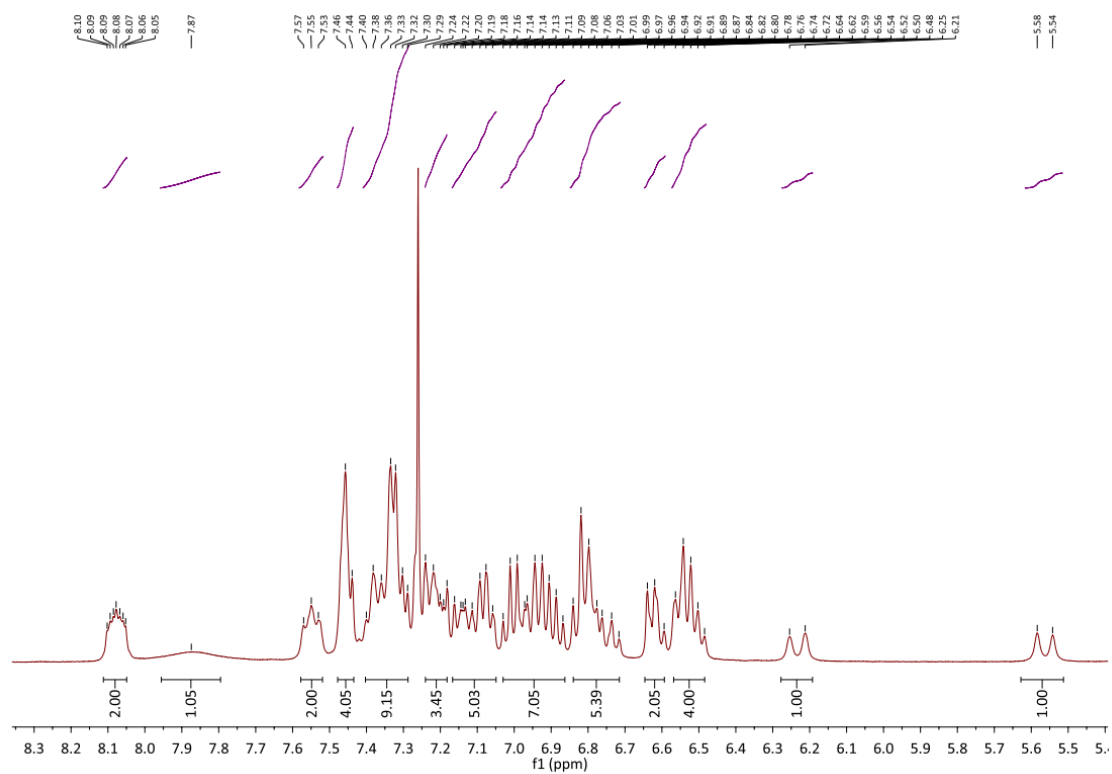

Figure S88:  $^{13}\text{C}\{^1\text{H}\}$  NMR spectrum of **10**.

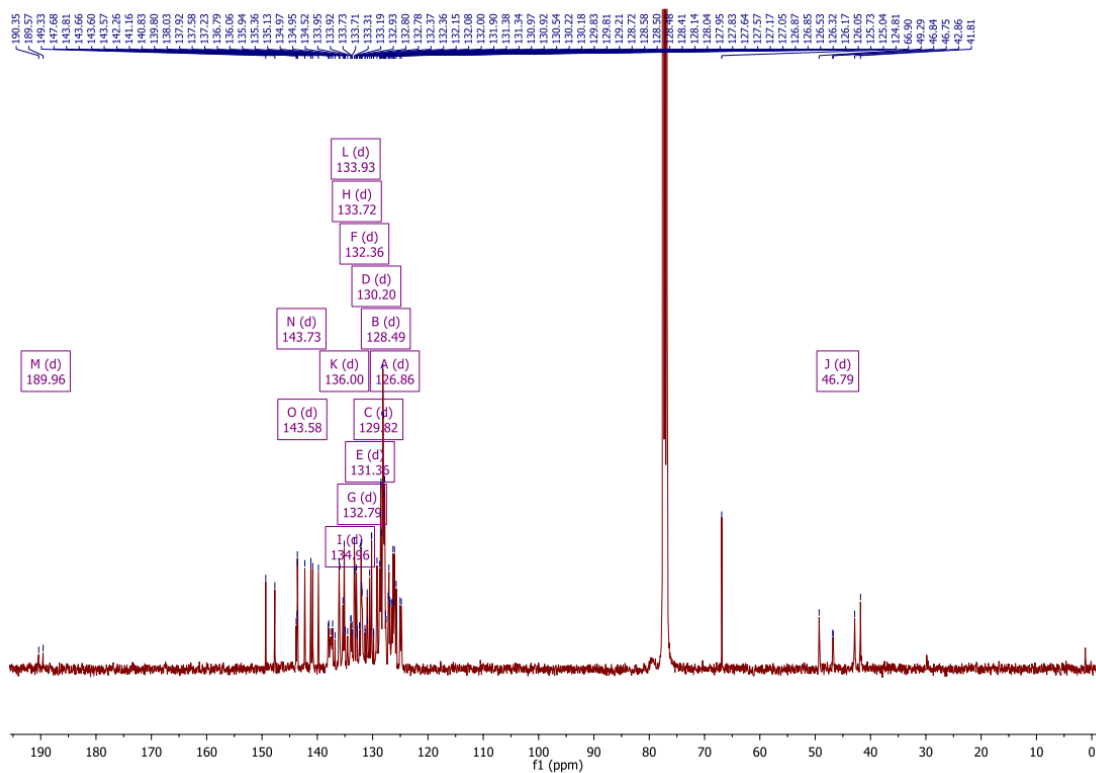

**Figure S89:**  $^{13}\text{C}\{^1\text{H}\}$  NMR spectrum of **10** (expanded).

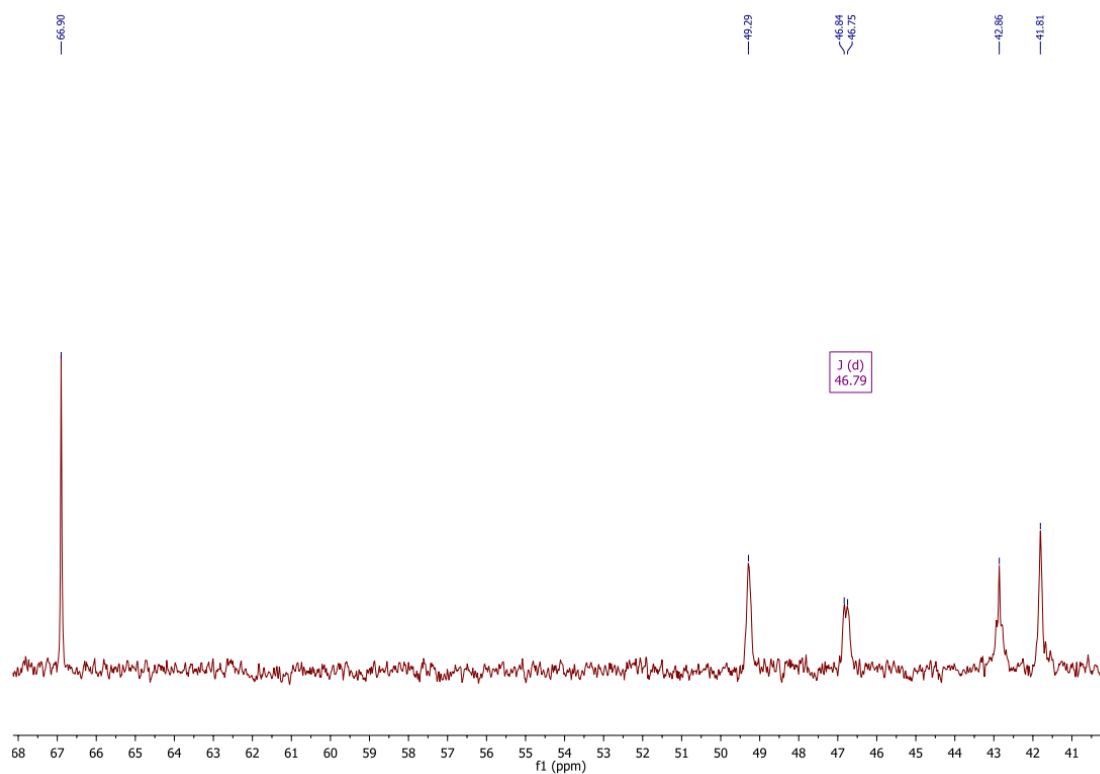

**Figure S90:**  $^{13}\text{C}\{^1\text{H}\}$  NMR spectrum of **10** (expanded).

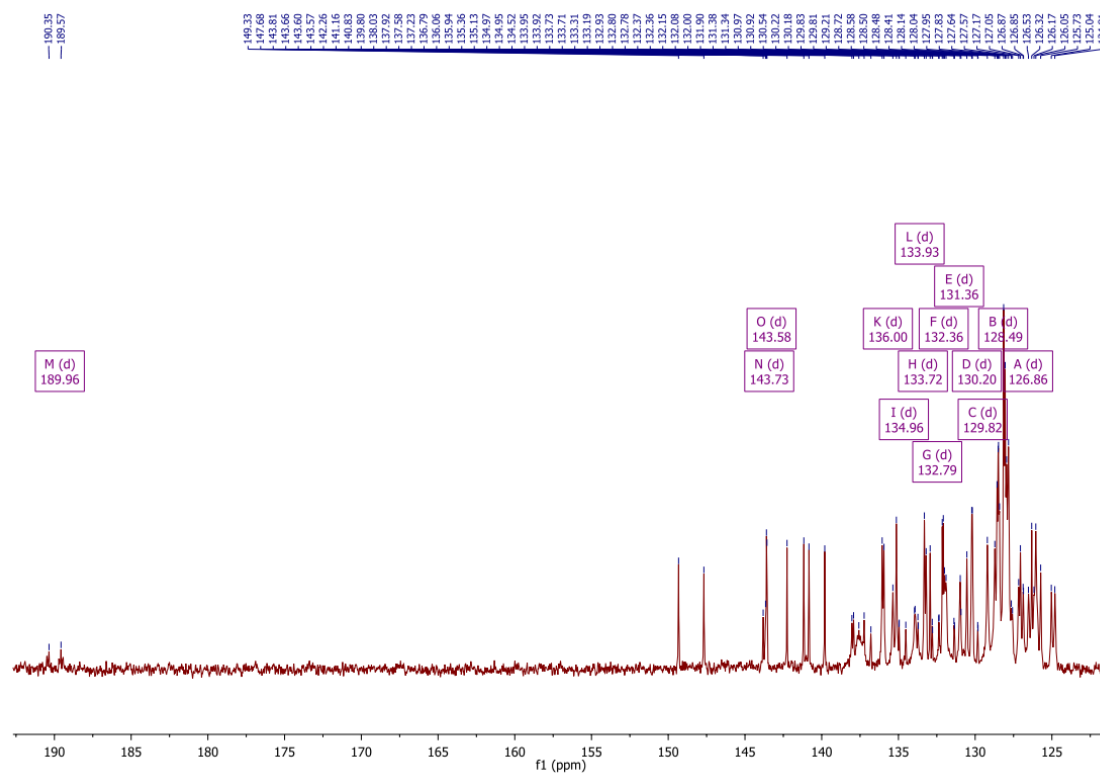

**Figure S91:**  $^{31}\text{P}\{^1\text{H}\}$  NMR spectrum of **10**.

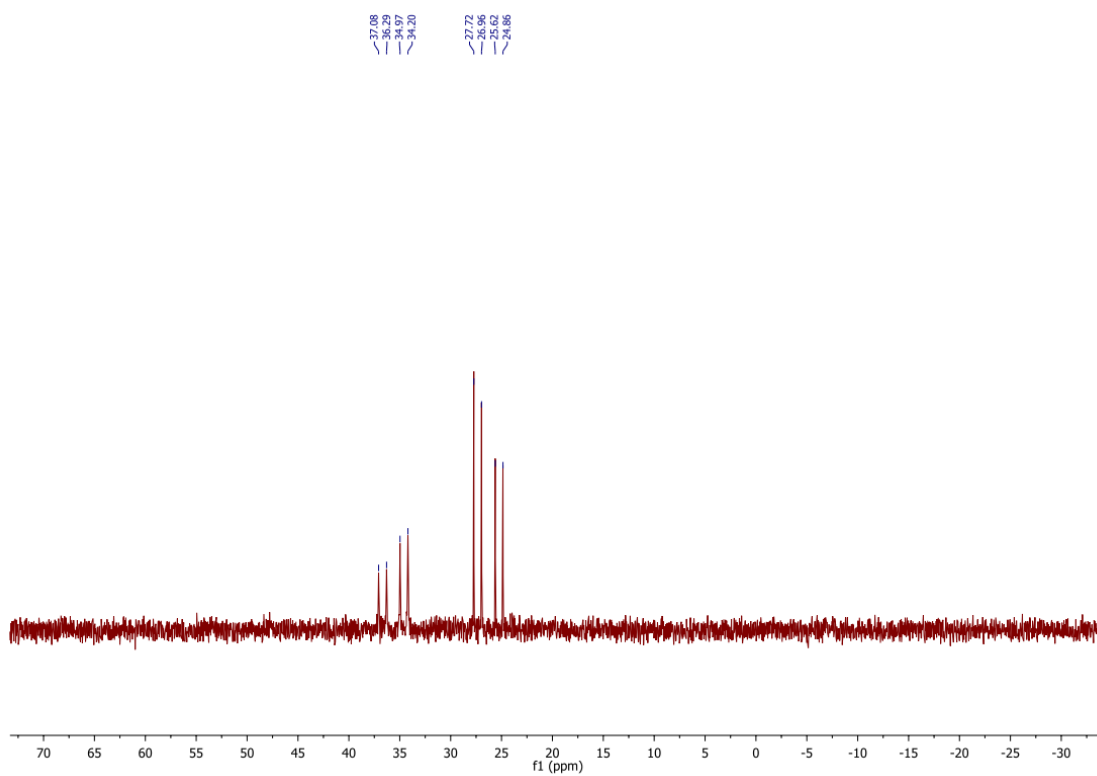

**Figure S92:**  $^1\text{H}$ , $^1\text{H}$ -COSY NMR spectrum of **10**.

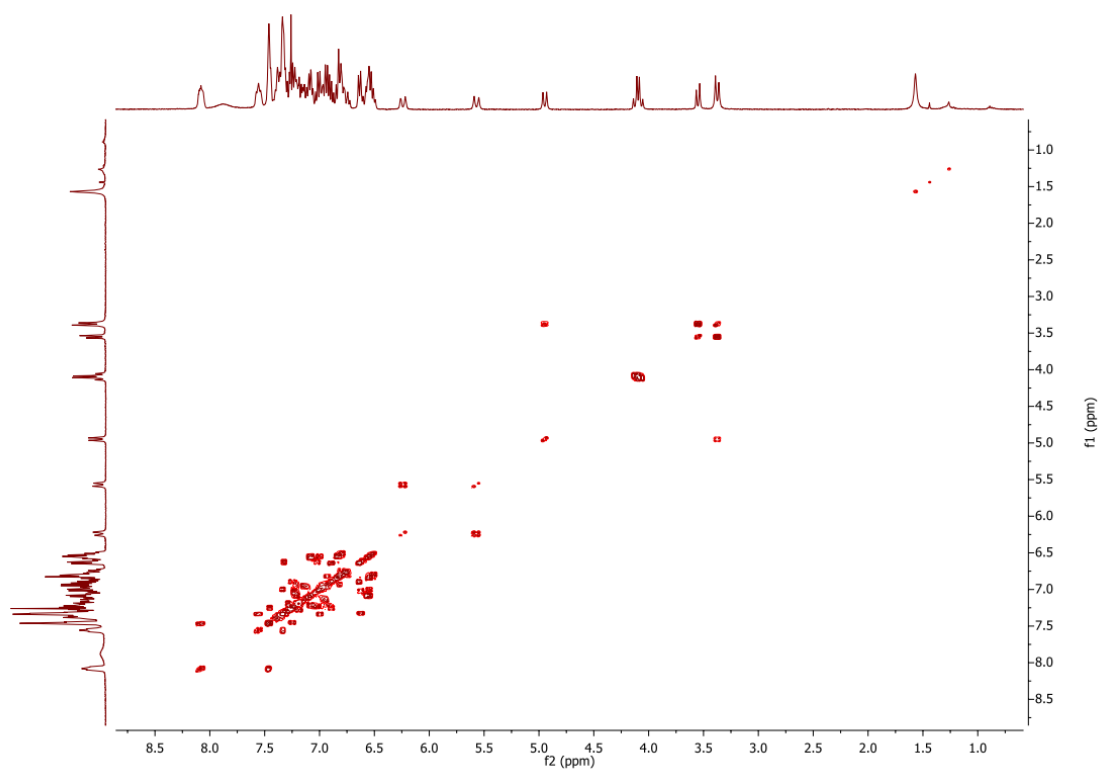

**Figure S93:** H,H-COSY NMR spectrum of **10** (expanded).

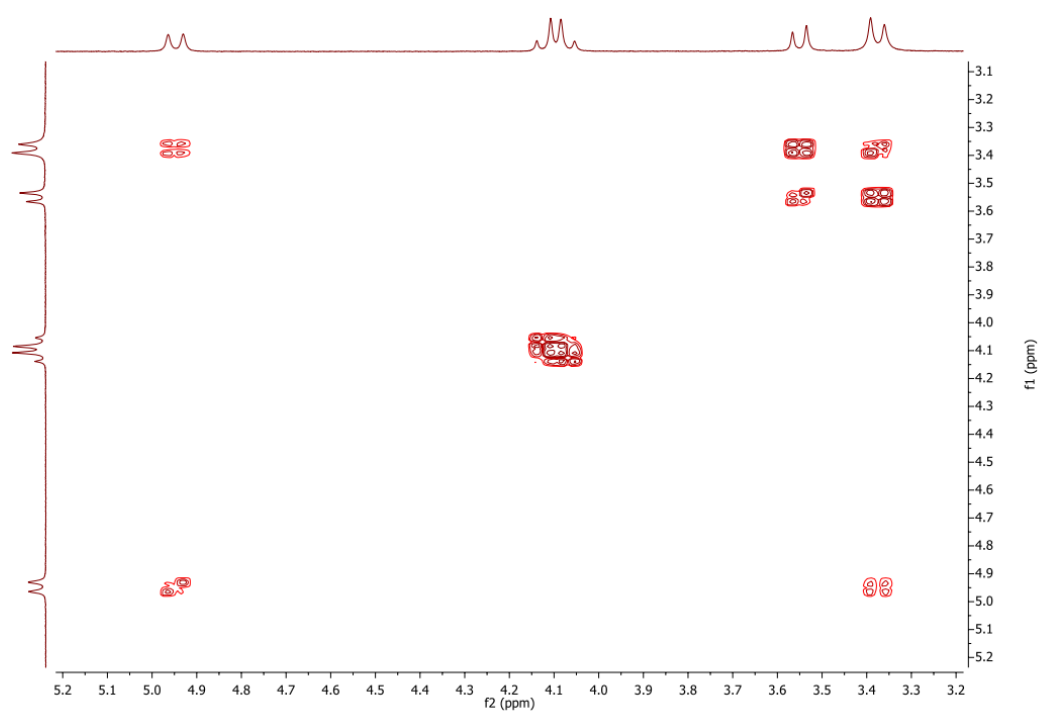

**Figure S94:** H,H-COSY NMR spectrum of **10** (expanded).

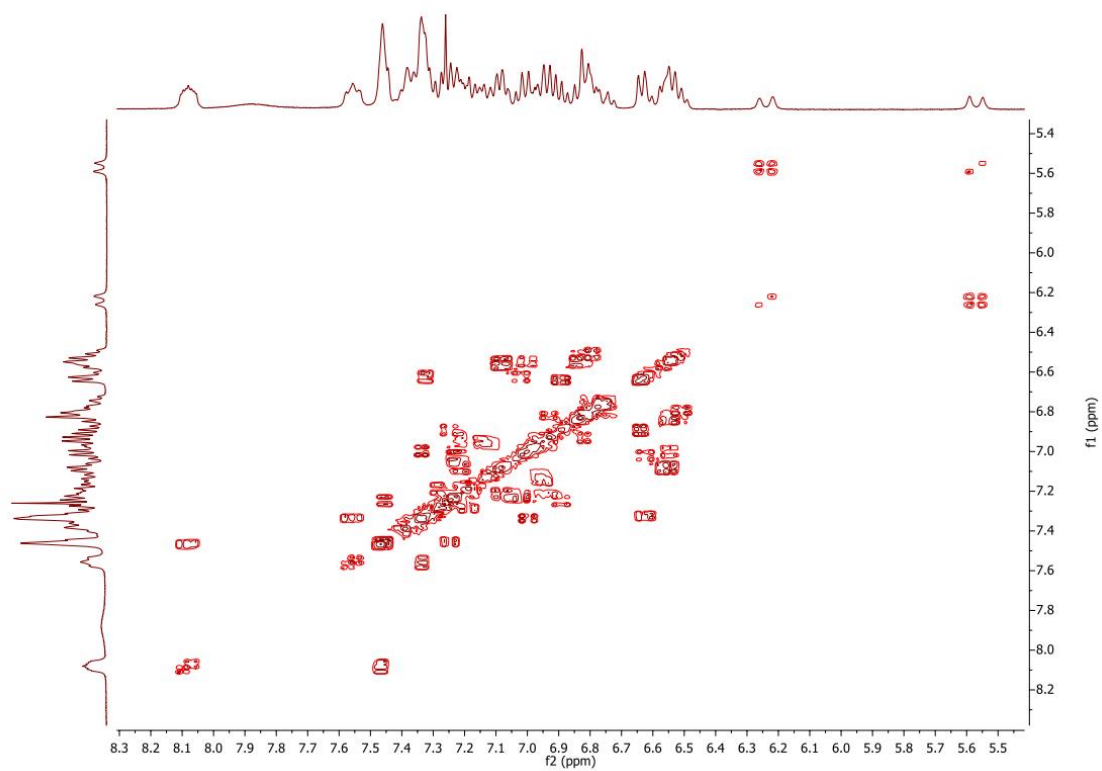

Supplement: s1 [file s1]
